# Supplementary material for: Palladium(0)-catalyzed synthesis of cyclic glucosides
Source: Royal Society of Chemistry journal article supplement (doi:10.1039/c4ob01975j), 2014-10-30

# Palladium(0)-Catalyzed Synthesis of Cyclic Glucosides

Xin Huang,<sup>a</sup> Chunling Fu,<sup>a</sup> and Shengming Ma<sup>a,\*</sup>

<sup>a</sup> Laboratory of Molecular Recognition and Synthesis, Department of Chemistry, Zhejiang University,  
Hangzhou 310027, Zhejiang, P. R. China

Fax: (+86)21-6260-9305; E-mail: [masm@sioc.ac.cn](mailto:masm@sioc.ac.cn)

## Supporting Information

|                                                                              |     |
|------------------------------------------------------------------------------|-----|
| Full experimental details and analytical data                                | S2  |
| References                                                                   | S27 |
| <sup>1</sup> H NMR and <sup>13</sup> C NMR spectra of the compounds prepared | S28 |

### **General Experimental Methods:**

$^1\text{H}$  and  $^{13}\text{C}$  nuclear magnetic resonance spectra were recorded on an instrument operated at 300 MHz for  $^1\text{H}$  NMR and 75 MHz for  $^{13}\text{C}$  NMR. Deuteriochloroform ( $\text{CDCl}_3$ ) and dimethyl sulfoxide- $d_6$  ( $d_6$ -DMSO) were used as solvent in NMR experiments. Chemical shifts ( $\delta$ ) are given in parts per million (ppm). Infrared spectra were recorded from the films of pure samples on sodium chloride plates for liquid or in the form of KBr discs for the solid samples. Mass and HRMS spectra were carried out in ESI mode. Thin layer chromatography was performed on pre-coated glass-back plates and visualized with UV light at 254 nm. Flash column chromatography was performed on silica gel. DMF used was stirred with  $\text{CaH}_2$  for 12 hours at 80 °C and distilled in vacuo before use.  $\text{K}_2\text{CO}_3$  was bought from Sinopharm Chemical Reagent Co., Ltd.  $\text{Pd}_2(\text{dba})_3\cdot\text{CHCl}_3$  was bought from Alfa Aesar and TFP was bought from Aldrich.

## 1. Pd(0)-Catalyzed Coupling-Cyclization of **1** with Different Organic iodides **2** under Standard Conditions.

(1) Preparation of **3a**. (hx-5-144)

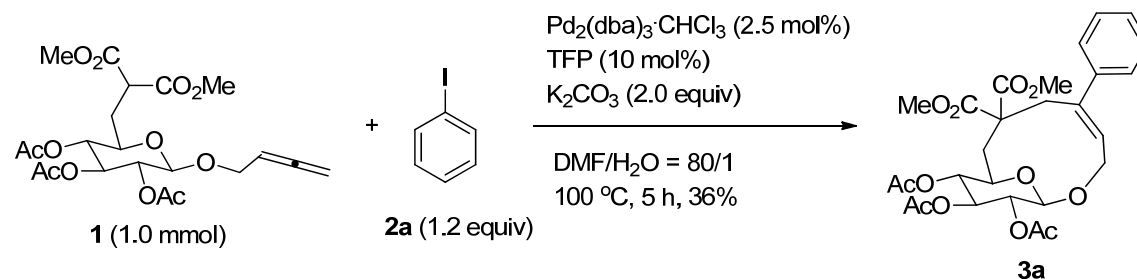

**Typical Procedure I:** To a flame-dried three-necked flask (100 mL) equipped with a reflux condenser containing K<sub>2</sub>CO<sub>3</sub> (278.1 mg, 2.0 mmol) were added Pd<sub>2</sub>(dba)<sub>3</sub>·CHCl<sub>3</sub> (25.5 mg, 0.025 mmol), TFP (23.5 mg, 0.1 mmol), **1** (477.6 mg, 1.0 mmol), **2a** (251.2 mg, 1.2 mmol), and DMF/H<sub>2</sub>O (V/V = 80/1, 40.0 mL) sequentially under nitrogen atmosphere. The reaction was complete after being stirred at 100 °C for 5 h as monitored by TLC (eluent: petroleum ether/ethyl acetate = 2.5/1). After evaporation of the solvent, the residue was diluted with 60 mL of EtOAc, washed with water and brine, and dried over anhydrous Na<sub>2</sub>SO<sub>4</sub>. After filtration and evaporation of the solvent, chromatography on silica gel (eluent: petroleum ether/ethyl acetate = 2.5/1) afforded **3a** (197.4 mg, 36%) as a solid: M.P. 185-186 °C (*n*-hexane/DCM); [α]<sub>D</sub><sup>20</sup> = + 111.4 (*c* = 0.475, CHCl<sub>3</sub>); <sup>1</sup>H NMR (300 MHz, CDCl<sub>3</sub>) δ 7.32-7.19 (m, 5 H, ArH), 5.99 (t, *J* = 8.1 Hz, 1 H, CH=), 5.22-5.08 (m, 2 H), 5.03-4.93 (m, 1 H), 4.86 (s, 1 H), 4.41-4.27 (m, 2 H), 3.88 (d, *J* = 13.8 Hz, 1 H), 3.83-3.67 (m, 1 H), 3.74 (s, 3 H, Me), 3.29 (d, *J* = 13.8 Hz, 1 H), 2.89 (s, 3 H, Me), 2.70 (dd, *J*<sub>1</sub> = 14.7 Hz, *J*<sub>2</sub> = 12.3 Hz, 1 H), 2.13-1.96 (m, 1 H), 2.08 (s, 3 H, Me), 2.06 (s, 3 H, Me), 2.04 (s, 3 H, Me); <sup>13</sup>C NMR (75 Hz, CDCl<sub>3</sub>) δ 170.8, 170.4, 169.7, 169.5, 169.3, 145.0,

141.4, 128.2, 127.8, 127.5, 127.0, 102.0, 73.7, 70.8, 69.7, 64.5, 55.6, 52.5, 51.7, 33.6, 32.9, 20.6, 20.5; IR (KBr)  $\nu$  ( $\text{cm}^{-1}$ ) 2957, 1754, 1730, 1439, 1370, 1243, 1221, 1117, 1080, 1067, 1041; MS (ESI,  $m/z$ ) 1119 ( $2M+\text{Na}^+$ ), 587 ( $M+\text{K}^+$ ), 571 ( $M+\text{Na}^+$ ), 566 ( $M+\text{NH}_4^+$ ), 549 ( $M+\text{H}^+$ ); Anal. Calcd. for  $\text{C}_{27}\text{H}_{32}\text{O}_{12}$  (%): C 59.12, H 5.88; Found: C 59.13, H 5.92.

The following compounds were prepared according to **Typical Procedure I**.

(2) Preparation of **3b**. (hx-8-140, hx-4-119)

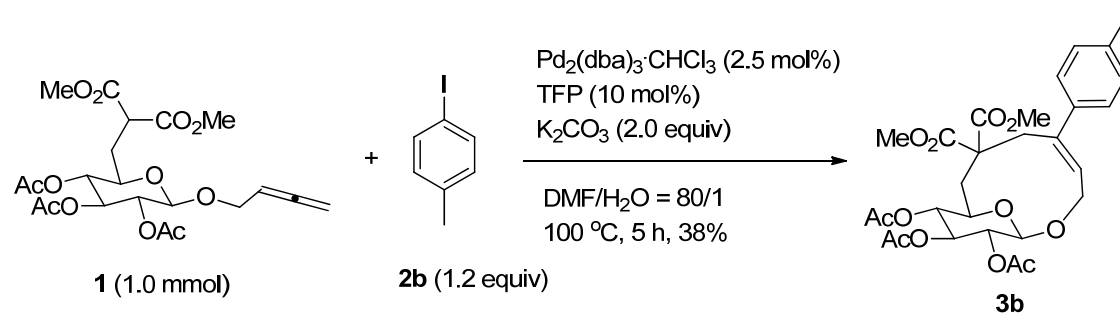

The reaction of  $\text{K}_2\text{CO}_3$  (276.4 mg, 2.0 mmol),  $\text{Pd}_2(\text{dba})_3\cdot\text{CHCl}_3$  (25.9 mg, 0.025 mmol), TFP (23.2 mg, 0.1 mmol), **1** (471.7 mg, 1.0 mmol), and **2b** (262.3 mg, 1.2 mmol) in DMF/ $\text{H}_2\text{O}$  ( $V/V = 80/1$ , 40.0 mL) at 100 °C for 5 h afforded **3b** (212.6 mg, 38%) as a solid after chromatography on silica gel (eluent: petroleum ether/ethyl acetate (2.5/1): M.P. 171-172 °C (*n*-hexane/DCM);  $[\alpha]_{\text{D}}^{20} = +105.5$  ( $c = 0.685$ ,  $\text{CHCl}_3$ );  $^1\text{H}$  NMR (300 MHz,  $\text{CDCl}_3$ )  $\delta$  7.14 (d,  $J = 8.1$  Hz, 2 H, ArH), 7.08 (d,  $J = 8.1$  Hz, 2 H, ArH), 5.96 (t,  $J = 7.8$  Hz, 1 H, CH=), 5.22-5.08 (m, 2 H), 5.05-4.92 (m, 1 H), 4.85 (s, 1 H), 4.40-4.24 (m, 2 H), 3.93-3.66 (m, 2 H), 3.74 (s, 3 H, Me), 3.27 (d,  $J = 13.8$  Hz, 1 H), 2.93 (s, 3 H, Me), 2.77-2.60 (m, 1 H), 2.31 (s, 3 H), 2.13-1.95 (m, 1 H), 2.08 (s, 3 H, Me), 2.05 (s, 3 H, Me), 2.04 (s, 3 H, Me);  $^{13}\text{C}$  NMR (75 Hz,  $\text{CDCl}_3$ )  $\delta$  170.7, 170.4, 169.7, 169.4, 169.2, 144.9, 138.5, 137.1, 128.4, 127.5, 126.9, 102.0,

73.8, 73.7, 70.8, 69.7, 64.6, 55.6, 52.4, 51.7, 33.6, 32.9, 20.8, 20.51, 20.47; IR (KBr)  $\nu$  ( $\text{cm}^{-1}$ ) 2964, 1754, 1731, 1437, 1369, 1239, 1220, 1114, 1079, 1067, 1042; MS (ESI,  $m/z$ ) 585 ( $M+\text{Na}^+$ ); Anal. Calcd. for  $\text{C}_{28}\text{H}_{34}\text{O}_{12}$  (%): C 59.78, H 6.09; Found: C 59.43, H 5.93.

(3) Preparation of **3c**. (hx-5-172)

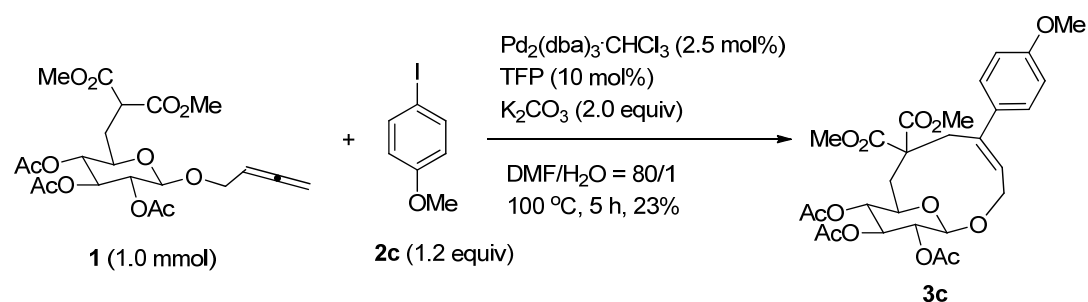

The reaction of  $\text{K}_2\text{CO}_3$  (277.4 mg, 2.0 mmol),  $\text{Pd}_2(\text{dba})_3 \cdot \text{CHCl}_3$  (25.7 mg, 0.025 mmol), TFP (23.5 mg, 0.1 mmol), **1** (474.4 mg, 1.0 mmol), and **2c** (280.9 mg, 1.2 mmol) in DMF/ $\text{H}_2\text{O}$  ( $V/V = 80/1$ , 40.0 mL) at 100 °C for 5 h afforded **3c** (133.0 mg, 23%) as a solid after chromatography on silica gel (eluent: petroleum ether/ethyl acetate (2.5/1): M.P. 101-102 °C (*n*-hexane/EtOAc);  $[\alpha]_{\text{D}}^{20} = +117.9$  ( $c = 0.895$ ,  $\text{CHCl}_3$ );  $^1\text{H}$  NMR (300 MHz,  $\text{CDCl}_3$ )  $\delta$  7.18 (d,  $J = 8.7$  Hz, 2 H, ArH), 6.82 (d,  $J = 8.4$  Hz, 2 H, ArH), 5.93 (t,  $J = 8.0$  Hz, 1 H, CH=), 5.22-5.07 (m, 2 H), 5.04-4.94 (m, 1 H), 4.86 (s, 1 H), 4.40-4.24 (m, 2 H), 3.93-3.67 (m, 2 H), 3.78 (s, 3 H, Me), 3.75 (s, 3 H, Me), 3.25 (d,  $J = 13.8$  Hz, 1 H), 2.99 (s, 3 H, Me), 2.68 (dd,  $J_1 = 14.6$  Hz,  $J_2 = 12.5$  Hz, 1 H), 2.14-1.95 (m, 1 H), 2.09 (s, 3 H, Me), 2.06 (s, 3 H, Me), 2.04 (s, 3 H, Me);  $^{13}\text{C}$  NMR (75 Hz,  $\text{CDCl}_3$ )  $\delta$  170.8, 170.5, 169.8, 169.5, 169.4, 159.0, 144.5, 133.8, 128.1, 127.1, 113.1, 102.0, 73.9, 73.7, 70.7, 69.7, 64.7, 55.5, 55.0, 52.5, 51.9, 33.5, 32.9, 20.6, 20.5; IR (KBr)  $\nu$  ( $\text{cm}^{-1}$ ) 2954, 1755, 1739, 1607, 1152, 1438, 1371, 1247,

1221, 1181, 1036; MS (ESI, m/z) 617 (M+K<sup>+</sup>), 601 (M+Na<sup>+</sup>), 596 (M+NH<sub>4</sub><sup>+</sup>), 579 (M+H<sup>+</sup>); Anal. Calcd. for C<sub>28</sub>H<sub>34</sub>O<sub>13</sub> (%): C 58.13, H 5.92; Found: C 57.99, H 5.94.

(4) Preparation of **3d**. (hx-6-10)

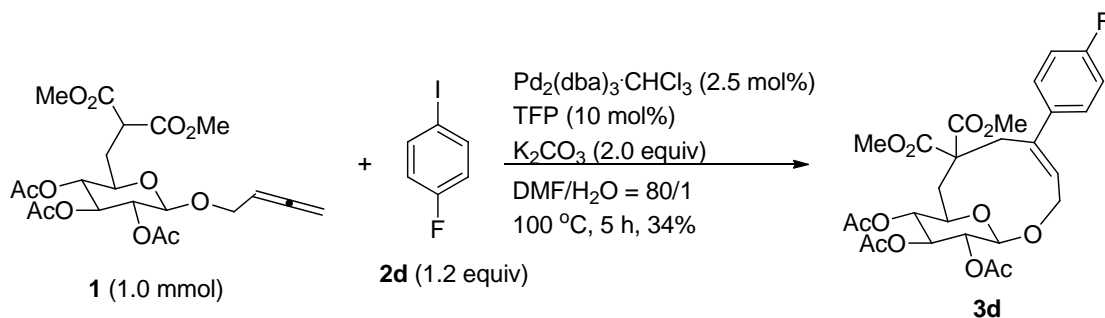

The reaction of K<sub>2</sub>CO<sub>3</sub> (277.2 mg, 2.0 mmol), Pd<sub>2</sub>(dba)<sub>3</sub>·CHCl<sub>3</sub> (26.0 mg, 0.025 mmol), TFP (23.4 mg, 0.1 mmol), **1** (471.1 mg, 1.0 mmol), and **2d** (266.8 mg, 1.2 mmol) in DMF/H<sub>2</sub>O (V/V = 80/1, 40.0 mL) at 100 °C for 5 h afforded **3d** (193.8 mg, 34%) as a solid after chromatography on silica gel (eluent: petroleum ether/ethyl acetate (2.5/1): M.P. 185-186 °C (*i*-PrOH); [α]<sub>D</sub><sup>20</sup> = + 88.9 (*c* = 1.025, CHCl<sub>3</sub>); <sup>1</sup>H NMR (300 MHz, CDCl<sub>3</sub>) δ 7.28-7.16 (m, 2 H, ArH), 6.98 (t, *J* = 8.4 Hz, 2 H, ArH), 5.96 (t, *J* = 8.0 Hz, 1 H, CH=), 5.22-5.08 (m, 2 H), 4.98 (d, *J* = 5.1 Hz, 1 H), 4.86 (s, 1 H), 4.42-4.24 (m, 2 H), 3.88 (d, *J* = 14.1 Hz, 1 H), 3.83-3.65 (m, 1 H), 3.75 (s, 3 H, Me), 3.24 (d, *J* = 13.8 Hz, 1 H), 2.99 (s, 3 H, Me), 2.67 (dd, *J*<sub>1</sub> = 14.7 Hz, *J*<sub>2</sub> = 12.3 Hz, 1 H), 2.17-1.95 (m, 1 H), 2.09 (s, 3 H, Me), 2.06 (s, 3 H, Me), 2.04 (s, 3 H, Me); <sup>13</sup>C NMR (75 Hz, CDCl<sub>3</sub>) δ 170.7, 170.4, 169.8, 169.5, 169.4, 162.2 (d, *J* = 245.5 Hz), 144.0, 137.5 (d, *J* = 2.8 Hz), 128.8 (d, *J* = 8.3 Hz), 128.5, 114.7 (d, *J* = 21.4 Hz), 102.1, 73.85, 73.77, 70.8, 69.7, 64.5, 55.6, 52.6, 51.8, 33.6, 33.1, 20.6, 20.5; <sup>19</sup>F NMR (282 MHz, CDCl<sub>3</sub>) δ -114.8 (s, 1 F); IR (KBr) ν (cm<sup>-1</sup>) 2956, 1755, 1728, 1599, 1508, 1438, 1370, 1239, 1220, 1080, 1067, 1042; MS (ESI, m/z) 584 (M+NH<sub>4</sub><sup>+</sup>); Anal.

Calcd. for C<sub>27</sub>H<sub>31</sub>FO<sub>12</sub> (%): C 57.24, H 5.52; Found: C 56.88, H 5.55.

(5) Preparation of **3e**. (hx-5-198, hx-4-118)

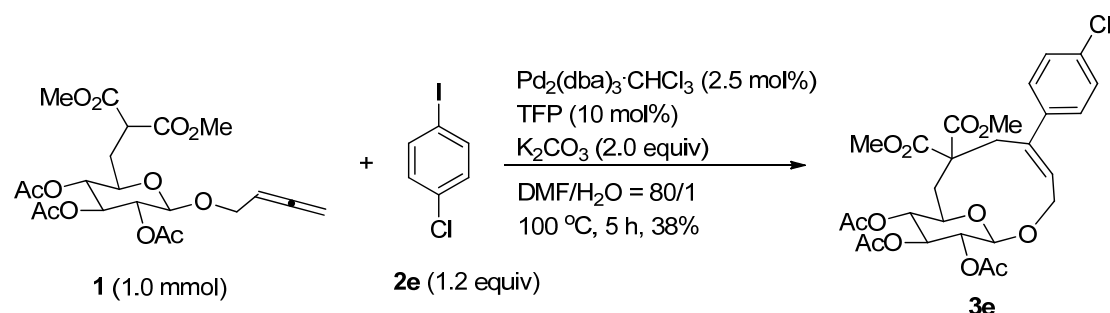

The reaction of K<sub>2</sub>CO<sub>3</sub> (278.1 mg, 2.0 mmol), Pd<sub>2</sub>(dba)<sub>3</sub>·CHCl<sub>3</sub> (25.7 mg, 0.025 mmol), TFP (23.8 mg, 0.1 mmol), **1** (473.2 mg, 1.0 mmol), and **2e** (287.3 mg, 1.2 mmol) in DMF/H<sub>2</sub>O (V/V = 80/1, 40.0 mL) at 100 °C for 5 h afforded **3e** (222.6 mg, 38%) as a solid after chromatography on silica gel (eluent: petroleum ether/ethyl acetate (2.5/1): M.P. 181-182 °C (*n*-hexane/DCM); [α]<sub>D</sub><sup>20</sup> = + 107.5 (*c* = 1.055, CHCl<sub>3</sub>); <sup>1</sup>H NMR (300 MHz, CDCl<sub>3</sub>) δ 7.26 (d, *J* = 8.1 Hz, 2 H, ArH), 7.18 (d, *J* = 8.4 Hz, 2 H, ArH), 5.98 (t, *J* = 7.8 Hz, 1 H, CH=), 5.23-5.05 (m, 2 H), 4.98 (d, *J* = 5.4 Hz, 1 H), 4.86 (s, 1 H), 4.45-4.22 (m, 2 H), 3.88 (d, *J* = 14.1 Hz, 1 H), 3.82-3.65 (m, 1 H), 3.75 (s, 3 H, Me), 3.23 (d, *J* = 14.1 Hz, 1 H), 2.98 (s, 3 H, Me), 2.66 (dd, *J*<sub>1</sub> = 14.7 Hz, *J*<sub>2</sub> = 12.3 Hz, 1 H), 2.14-1.94 (m, 1 H), 2.08 (s, 3 H, Me), 2.06 (s, 3 H, Me), 2.04 (s, 3 H, Me); <sup>13</sup>C NMR (75 Hz, CDCl<sub>3</sub>) δ 170.7, 170.4, 169.8, 169.5, 169.4, 144.0, 140.0, 133.4, 128.9, 128.5, 128.0, 102.2, 73.8, 70.9, 69.8, 64.5, 55.7, 52.6, 51.9, 33.7, 33.0, 20.62, 20.59; IR (KBr) ν (cm<sup>-1</sup>) 2961, 1728, 1490, 1467, 1436, 1368, 1241, 1219, 1111, 1080, 1067, 1044, 1015; MS (ESI, *m/z*) 607 (M (<sup>37</sup>Cl)+Na<sup>+</sup>), 605 (M (<sup>35</sup>Cl)+Na<sup>+</sup>), 585 (M (<sup>37</sup>Cl)+H<sup>+</sup>), 583 (M (<sup>35</sup>Cl)+H<sup>+</sup>); Anal. Calcd. for C<sub>27</sub>H<sub>31</sub>ClO<sub>12</sub> (%): C 55.63, H 5.36; Found: C 55.35, H 5.24.

(6) Preparation of **3f**. (hx-5-42 hx-7-88 (4.0 mmol))

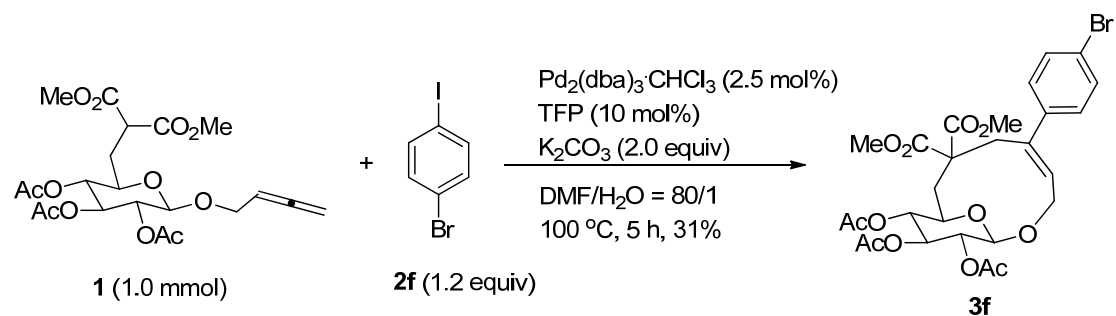

The reaction of  $\text{K}_2\text{CO}_3$  (276.4 mg, 2.0 mmol),  $\text{Pd}_2(\text{dba})_3\cdot\text{CHCl}_3$  (26.2 mg, 0.025 mmol), TFP (23.5 mg, 0.1 mmol), **1** (472.3 mg, 1.0 mmol), and **2f** (340.1 mg, 1.2 mmol) in  $\text{DMF}/\text{H}_2\text{O}$  ( $V/V = 80/1$ , 40.0 mL) at  $100\text{ }^\circ\text{C}$  for 5 h afforded **3f** (193.5 mg, 31%) as a solid after chromatography on silica gel (eluent: petroleum ether/ethyl acetate (3/1) to petroleum ether/ethyl acetate (2/1)):  $^1\text{H}$  NMR (300 MHz,  $\text{CDCl}_3$ )  $\delta$  7.37 (d,  $J = 8.4$  Hz, 2 H, ArH), 7.08 (d,  $J = 8.4$  Hz, 2 H, ArH), 5.93 (t,  $J = 7.8$  Hz, 1 H, CH=), 5.19-5.03 (m, 2 H), 4.92 (d,  $J = 5.7$  Hz, 1 H), 4.81 (s, 1 H), 4.37-4.18 (m, 2 H), 3.82 (d,  $J = 14.1$  Hz, 1 H), 3.78-3.63 (m, 1 H), 3.70 (s, 3 H, Me), 3.18 (d,  $J = 13.8$  Hz, 1 H), 2.93 (s, 3 H, Me), 2.67-2.53 (m, 1 H), 2.10-1.90 (m, 1 H), 2.04 (s, 3 H, Me), 2.01 (s, 3 H, Me), 2.00 (s, 3 H).

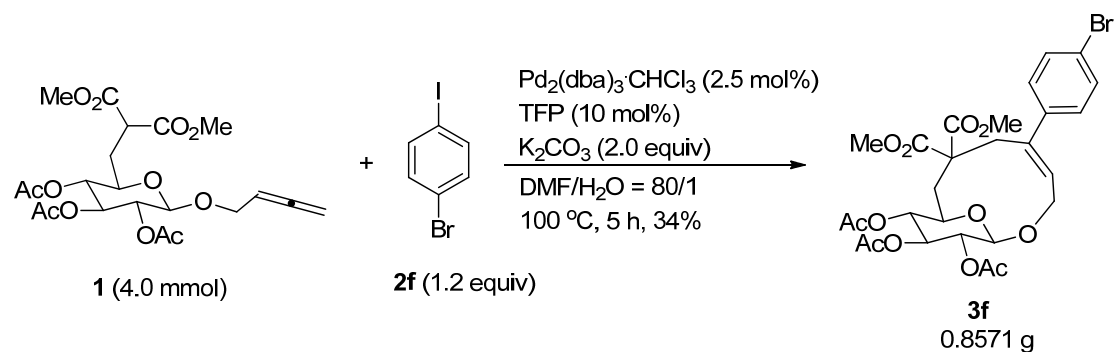

**A 4.0 mmol scale reaction:** The reaction of  $\text{K}_2\text{CO}_3$  (1174.2 mg, 8.0 mmol),  $\text{Pd}_2(\text{dba})_3\cdot\text{CHCl}_3$  (103.6 mg, 0.1 mmol), TFP (92.8 mg, 0.4 mmol), **1** (1889.0 mg, 4.0 mmol), and **2f** (1358.2 mg, 1.2 mmol) in  $\text{DMF}/\text{H}_2\text{O}$  ( $V/V = 80/1$ , 160.0 mL) at  $100\text{ }^\circ\text{C}$



for 5 h afforded **3f** (857.1 mg, 34%) as a solid after chromatography on silica gel (eluent: petroleum ether/ethyl acetate (2.5/1)): M.P. 172-174 °C (*n*-hexane/EtOAc);  $[\alpha]_D^{20} = +105.2$  ( $c = 1.080$ ,  $\text{CHCl}_3$ );  $^1\text{H NMR}$  (300 MHz,  $\text{CDCl}_3$ )  $\delta$  7.42 (d,  $J = 8.4$  Hz, 2 H, ArH), 7.13 (d,  $J = 8.4$  Hz, 2 H, ArH), 5.98 (t,  $J = 8.1$  Hz, 1 H, CH=), 5.23-5.05 (m, 2 H), 4.97 (d,  $J = 5.7$  Hz, 1 H), 4.86 (s, 1 H), 4.42-4.23 (m, 2 H), 3.87 (d,  $J = 13.8$  Hz, 1 H), 3.82-3.65 (m, 1 H), 3.75 (s, 3 H, Me), 3.23 (d,  $J = 14.1$  Hz, 1 H), 2.97 (s, 3 H, Me), 2.72-2.56 (m, 1 H), 2.14-1.94 (m, 1 H), 2.09 (s, 3 H, Me), 2.06 (s, 3 H, Me), 2.04 (s, 3 H, Me);  $^{13}\text{C NMR}$  (75 Hz,  $\text{CDCl}_3$ )  $\delta$  170.7, 170.5, 169.9, 169.6, 169.5, 144.1, 140.5, 131.0, 129.0, 128.9, 121.6, 102.3, 73.9, 70.9, 69.8, 64.5, 55.8, 52.7, 52.0, 33.7, 33.0, 20.71, 20.66; IR (KBr)  $\nu$  ( $\text{cm}^{-1}$ ) 2953, 1755, 1728, 1486, 1467, 1436, 1369, 1242, 1217, 1111, 1079, 1066, 1042, 1011; MS (ESI,  $m/z$ ) 667 (M ( $^{81}\text{Br}$ )+ $\text{K}^+$ ), 665 (M ( $^{79}\text{Br}$ )+ $\text{K}^+$ ), 646 (M ( $^{81}\text{Br}$ )+ $\text{NH}_4^+$ ), 644 (M ( $^{79}\text{Br}$ )+ $\text{NH}_4^+$ ), 629 (M ( $^{81}\text{Br}$ )+ $\text{H}^+$ ), 627 (M ( $^{79}\text{Br}$ )+ $\text{H}^+$ ); Anal. Calcd. for  $\text{C}_{27}\text{H}_{31}\text{BrO}_{12}$  (%): C 51.69, H 4.98; Found: C 52.09, H 5.03.

(7) Preparation of **3g**. (hx-6-7, hx-4-134)

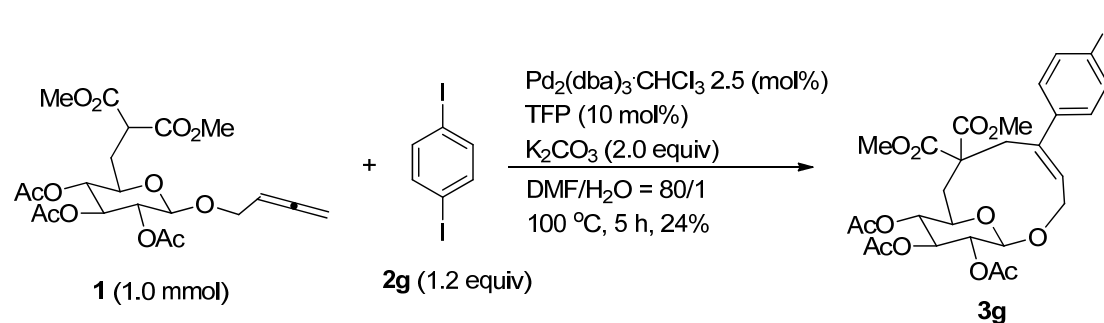

The reaction of  $\text{K}_2\text{CO}_3$  (276.8 mg, 2.0 mmol),  $\text{Pd}_2(\text{dba})_3 \cdot \text{CHCl}_3$  (25.9 mg, 0.025 mmol), TFP (23.2 mg, 0.1 mmol), **1** (473.5 mg, 1.0 mmol), and **2g** (396.3 mg, 1.2 mmol) in DMF/ $\text{H}_2\text{O}$  ( $V/V = 80/1$ , 40.0 mL) at 100 °C for 5 h afforded **3g** (164.2 mg,

24%) as a solid after chromatography on silica gel (eluent: petroleum ether/ethyl acetate (2.5/1)): M.P. 115-116 °C (*n*-hexane/EtOAc);  $[\alpha]_D^{20} = + 92.4$  ( $c = 0.94$ , CHCl<sub>3</sub>); <sup>1</sup>H NMR (300 MHz, CDCl<sub>3</sub>) δ 7.55 (d,  $J = 8.4$  Hz, 2 H, ArH), 6.93 (d,  $J = 8.1$  Hz, 2 H, ArH), 5.91 (t,  $J = 8.0$  Hz, 1 H, CH=), 5.17-4.99 (m, 2 H), 4.90 (d,  $J = 5.7$  Hz, 1 H), 4.79 (s, 1 H), 4.35-4.16 (m, 2 H), 3.79 (d,  $J = 14.1$  Hz, 1 H), 3.74-3.60 (m, 1 H), 3.68 (s, 3 H, Me), 3.15 (d,  $J = 14.1$  Hz, 1 H), 2.89 (s, 3 H, Me), 2.58 (dd,  $J_1 = 14.9$  Hz,  $J_2 = 12.5$  Hz, 1 H), 2.10-1.90 (m, 1 H), 2.01 (s, 3 H, Me), 2.00 (s, 3 H, Me), 1.97 (s, 3 H, Me); <sup>13</sup>C NMR (75 Hz, CDCl<sub>3</sub>) δ 170.6, 170.4, 169.8, 169.5, 169.4, 144.0, 141.0, 136.9, 129.0, 128.8, 102.1, 93.0, 73.7, 70.8, 69.6, 64.4, 55.6, 52.7, 51.9, 33.6, 32.8, 20.65, 20.60; IR (neat, cm<sup>-1</sup>) 2953, 1747, 1485, 1435, 1371, 1251, 1221, 1132, 1109, 1038, 1006; MS (ESI, *m/z*) 697 (M+Na<sup>+</sup>), 692 (M+NH<sub>4</sub><sup>+</sup>), 675 (M+H<sup>+</sup>); Anal. Calcd. for C<sub>27</sub>H<sub>31</sub>O<sub>12</sub> (%): C 48.08, H 4.63; Found: C 47.81, H 4.59.

(8) Preparation of **3h**. (hx-5-163, hx-4-106)

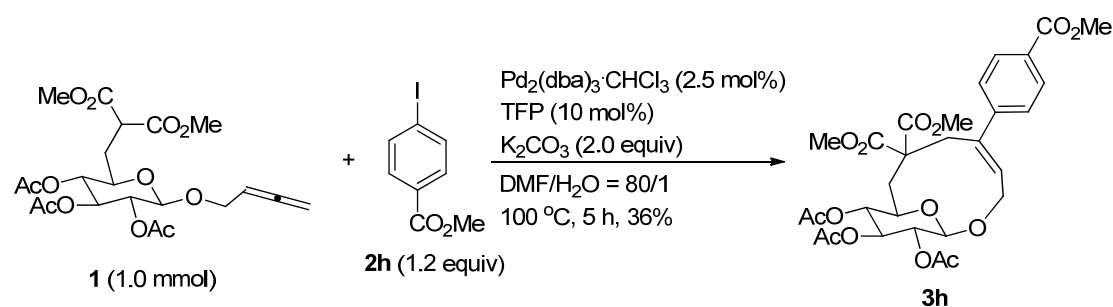

The reaction of K<sub>2</sub>CO<sub>3</sub> (277.8 mg, 2.0 mmol), Pd<sub>2</sub>(dba)<sub>3</sub>·CHCl<sub>3</sub> (25.6 mg, 0.025 mmol), TFP (23.1 mg, 0.1 mmol), **1** (474.3 mg, 1.0 mmol), and **2h** (314.6 mg, 1.2 mmol) in DMF/H<sub>2</sub>O (*V/V* = 80/1, 40.0 mL) at 100 °C for 5 h afforded **3h** (219.9 mg, 36%) as a solid after chromatography on silica gel (eluent: petroleum ether/ethyl acetate (2.5/1)): M.P. 109-111 °C (*n*-hexane/EtOAc);  $[\alpha]_D^{20} = + 116.1$  ( $c = 0.89$ ,

CHCl<sub>3</sub>); <sup>1</sup>H NMR (300 MHz, CDCl<sub>3</sub>) δ 7.97 (d, *J* = 8.4 Hz, 2 H, ArH), 7.34 (d, *J* = 8.4 Hz, 2 H, ArH), 6.06 (t, *J* = 8.0 Hz, 1 H, CH=), 5.23-5.08 (m, 2 H), 4.99 (d, *J* = 5.7 Hz, 1 H), 4.89 (s, 1 H), 4.43-4.25 (m, 2 H), 4.00-3.68 (m, 2 H), 3.91 (s, 3 H, Me), 3.76 (s, 3 H, Me), 3.31 (d, *J* = 14.1 Hz, 1 H), 2.90 (s, 3 H, Me), 2.69 (dd, *J*<sub>1</sub> = 14.9 Hz, *J*<sub>2</sub> = 12.2 Hz, 1 H), 2.20-1.94 (m, 1 H), 2.10 (s, 3 H, Me), 2.07 (s, 3 H, Me), 2.05 (s, 3 H, Me); <sup>13</sup>C NMR (75 Hz, CDCl<sub>3</sub>) δ 170.5, 170.2, 169.7, 169.4, 169.3, 166.4, 146.1, 144.1, 129.6, 129.0, 127.0, 102.1, 73.7, 73.6, 70.7, 69.5, 64.3, 55.5, 52.6, 51.9, 51.7, 33.6, 32.7, 20.53, 20.48; IR (neat, cm<sup>-1</sup>) 2954, 1732, 1607, 1435, 1372, 1281, 1223, 1107, 1038; MS (ESI, *m/z*) 645 (M+K<sup>+</sup>), 629 (M+Na<sup>+</sup>), 624 (M+NH<sub>4</sub><sup>+</sup>), 607 (M+H<sup>+</sup>); Anal. Calcd. for C<sub>29</sub>H<sub>34</sub>O<sub>14</sub> (%): C 57.42, H 5.65; Found: C 57.39, H 5.61.

(9) Preparation of **3i**. (hx-6-11)

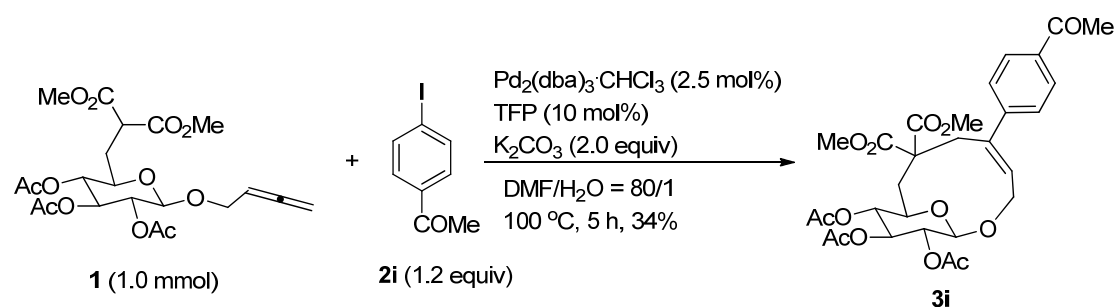

The reaction of K<sub>2</sub>CO<sub>3</sub> (276.3 mg, 2.0 mmol), Pd<sub>2</sub>(dba)<sub>3</sub>·CHCl<sub>3</sub> (25.6 mg, 0.025 mmol), TFP (23.3 mg, 0.1 mmol), **1** (470.7 mg, 1.0 mmol), and **2i** (295.4 mg, 1.2 mmol) in DMF/H<sub>2</sub>O (*V/V* = 80/1, 40.0 mL) at 100 °C for 5 h afforded **3i** (201.4 mg, 34%) as a solid after chromatography on silica gel (eluent: petroleum ether/ethyl acetate (2/1)): M.P. 108-109 °C (*n*-hexane/EtOAc); [α]<sub>D</sub><sup>20</sup> = + 111.5 (*c* = 1.105, CHCl<sub>3</sub>); <sup>1</sup>H NMR (300 MHz, CDCl<sub>3</sub>) δ 7.90 (d, *J* = 8.4 Hz, 2 H, ArH), 7.36 (d, *J* = 7.8 Hz, 2 H, ArH), 6.07 (t, *J* = 8.0 Hz, 1 H, CH=), 5.23-5.08 (m, 2 H), 4.99 (d, *J* = 6.0 Hz,

1 H), 4.89 (s, 1 H), 4.45-4.25 (m, 2 H), 3.92 (d,  $J = 13.8$  Hz, 1 H), 3.84-3.69 (m, 1 H), 3.76 (s, 3 H, Me), 3.31 (d,  $J = 14.1$  Hz, 1 H), 2.90 (s, 3 H, Me), 2.75-2.55 (m, 1 H), 2.59 (s, 3 H, Me), 2.18-1.96 (m, 1 H), 2.09 (s, 3 H, Me), 2.07 (s, 3 H, Me), 2.05 (s, 3 H, Me);  $^{13}\text{C}$  NMR (75 Hz,  $\text{CDCl}_3$ )  $\delta$  197.3, 170.5, 170.3, 169.7, 169.5, 169.3, 146.3, 144.1, 136.0, 129.8, 127.8, 127.2, 102.1, 73.71, 73.67, 70.8, 69.6, 64.3, 55.6, 52.6, 51.7, 33.6, 32.7, 26.4, 20.54, 20.49; IR (KBr)  $\nu$  ( $\text{cm}^{-1}$ ) 2954, 1753, 1736, 1685, 1603, 1437, 1370, 1247, 1221, 1134, 1107, 1039; MS (ESI,  $m/z$ ) 608 ( $\text{M}+\text{NH}_4^+$ ); Anal. Calcd. for  $\text{C}_{29}\text{H}_{34}\text{O}_{13}$  (%): C 58.98, H 5.80; Found: C 58.69, H 5.80.

(10) Preparation of **3j**. (hx-5-164, hx-5-72)

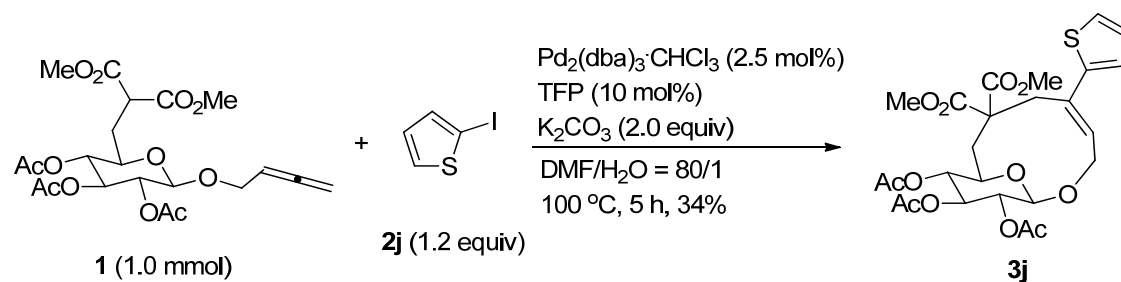

The reaction of  $\text{K}_2\text{CO}_3$  (277.3 mg, 2.0 mmol),  $\text{Pd}_2(\text{dba})_3 \cdot \text{CHCl}_3$  (25.8 mg, 0.025 mmol), TFP (23.4 mg, 0.1 mmol), **1** (472.0 mg, 1.0 mmol), and **2j** (253.1 mg, 1.2 mmol) in  $\text{DMF}/\text{H}_2\text{O}$  ( $V/V = 80/1$ , 40.0 mL) at 100 °C for 5 h afforded **3j** (188.8 mg, 34%) as a solid after chromatography on silica gel (eluent: petroleum ether/ethyl acetate (2/1)): M.P. 96-97 °C ( $n$ -hexane/EtOAc);  $[\alpha]_{\text{D}}^{20} = +116.4$  ( $c = 1.085$ ,  $\text{CHCl}_3$ );  $^1\text{H}$  NMR (300 MHz,  $\text{CDCl}_3$ )  $\delta$  7.07 (d,  $J = 3.6$  Hz, 1 H, ArH), 6.88-6.75 (m, 2 H, ArH), 6.08 (t,  $J = 7.5$  Hz, 1 H, CH=), 5.12-4.95 (m, 2 H), 4.86 (d,  $J = 5.1$  Hz, 1 H), 4.74 (s, 1 H), 4.31-4.11 (m, 2 H), 3.83-3.59 (m, 2 H), 3.66 (s, 3 H, Me), 3.20-3.00 (m, 1 H), 3.09 (s, 3 H, Me), 2.63 (t,  $J = 13.5$  Hz, 1 H), 2.11-1.86 (m, 1 H), 1.98 (s, 3 H, Me), 1.94 (s, 6 H, Me  $\times$  2);  $^{13}\text{C}$  NMR (75 Hz,  $\text{CDCl}_3$ )  $\delta$  170.7, 170.6, 169.6, 169.3,

169.2, 144.1, 137.8, 127.3, 126.6, 124.7, 124.3, 101.8, 73.7, 73.5, 70.6, 69.4, 64.1, 55.7, 52.4, 51.9, 33.6, 20.42, 20.39, 20.36; IR (KBr)  $\nu$  (cm<sup>-1</sup>) 3104, 3030, 2953, 2843, 1755, 1736, 1437, 1371, 1245, 1221, 1120, 1102, 1039; MS (ESI, m/z) 593 (M+K<sup>+</sup>), 577 (M+Na<sup>+</sup>), 572 (M+NH<sub>4</sub><sup>+</sup>), 555 (M+H<sup>+</sup>); Anal. Calcd. for C<sub>25</sub>H<sub>30</sub>O<sub>12</sub>S (%): C 54.14, H 5.45; Found: C 53.80, H 5.37.

(11) Preparation of **3k**. (hx-6-78)

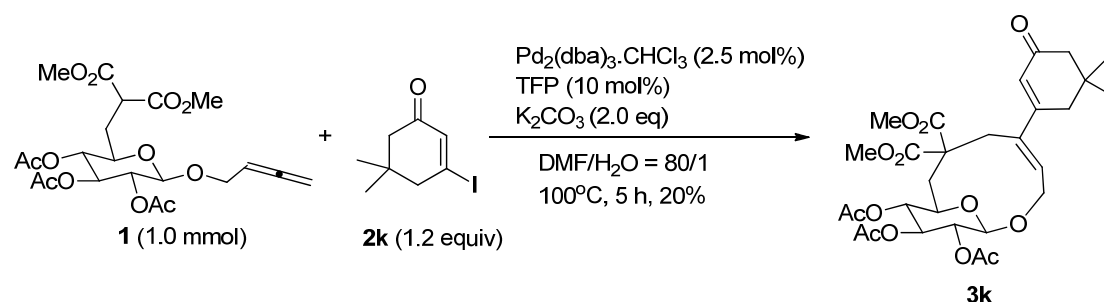

The reaction of K<sub>2</sub>CO<sub>3</sub> (276.2 mg, 2.0 mmol), Pd<sub>2</sub>(dba)<sub>3</sub>·CHCl<sub>3</sub> (25.7 mg, 0.025 mmol), TFP (22.8 mg, 0.1 mmol), **1** (472.4 mg, 1.0 mmol), and **2k** (300.5 mg, 1.2 mmol) in DMF/H<sub>2</sub>O (V/V = 80/1, 40.0 mL) at 100 °C for 5 h afforded **3k** (120.3 mg, 20%) as a solid after chromatography on silica gel (eluent: petroleum ether/ethyl acetate (2/1)): M.P. 104-106 °C (*n*-hexane/EtOAc);  $[\alpha]_D^{20} = +96.0$  (*c* = 0.95, CHCl<sub>3</sub>); <sup>1</sup>H NMR (300 MHz, CDCl<sub>3</sub>)  $\delta$  6.26 (t, *J* = 7.7 Hz, 1 H, CH=), 5.95 (s, 1 H, CH=), 5.23-5.00 (m, 2 H), 5.10-4.90 (m, 1 H), 4.83 (s, 1 H), 4.42-4.18 (m, 2 H), 3.90-3.68 (m, 2 H), 3.79 (s, 3 H, Me), 3.55 (s, 3 H, Me), 3.09 (d, *J* = 14.4 Hz, 1 H), 2.60-2.33 (m, 2 H), 2.32-2.17 (m, 3 H), 2.15-1.93 (m, 1 H), 2.08 (s, 3 H, Me), 2.05 (s, 6 H, Me  $\times$  2), 1.07 (s, 3 H), 1.04 (s, 3 H); <sup>13</sup>C NMR (75 Hz, CDCl<sub>3</sub>)  $\delta$  200.1, 171.2, 170.5, 169.8, 169.6, 169.4, 158.2, 143.7, 128.9, 124.1, 102.2, 74.2, 73.4, 70.5, 70.1, 64.2, 55.2, 52.7, 52.4, 50.8, 42.1, 33.6, 33.3, 31.3, 28.6, 27.5, 20.64, 20.59, 20.57; IR (KBr)

$\nu$  ( $\text{cm}^{-1}$ ) 2956, 1755, 1736, 1664, 1438, 1370, 1304, 1245, 1223, 1112, 1039; MS (ESI,  $m/z$ ) 617 ( $M+\text{Na}^+$ ), 595 ( $M+\text{H}^+$ ); Anal. Calcd. for  $\text{C}_{29}\text{H}_{38}\text{O}_{13}$  (%): C 58.58, H 6.44; Found: C 58.45, H 6.56.

## 2. Synthesis of cyclic glucosides **4** by deacetylation of **3**.<sup>[1]</sup>

### (1) Preparation of **4a**. (hx-8-143)

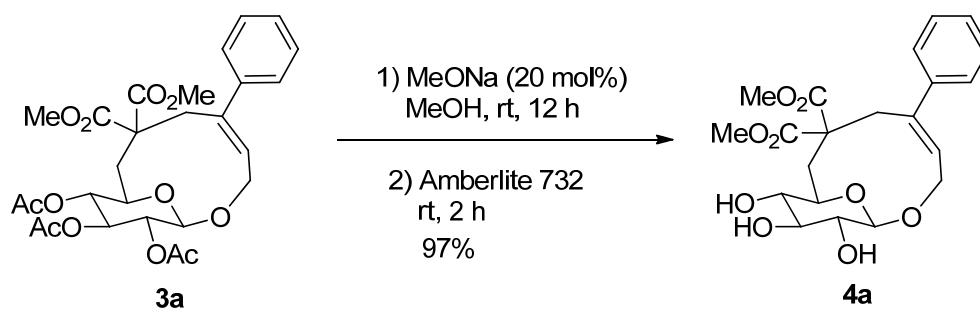

**Typical Procedure II:** To a 50-mL round-bottom flask were added **3a** (304.7 mg, 0.556 mmol), MeOH (30.0 mL), and MeONa (5.9 mg, 0.111 mmol) sequentially. The reaction was complete after being stirred at room temperature for 12 h as monitored by TLC (eluent: ethyl acetate /methanol = 6/1). Then Amberlite 732 was added to quench the reaction, which was filtered after the result mixture stirring at rt for 2 h. After evaporation of the solvent, chromatography on silica gel (eluent: ethyl acetate/methanol = 6/1) afforded **4a** (228.0 mg, 97%) as a syrup:  $[\alpha]_{\text{D}}^{20} = +132.0$  ( $c = 0.38$ , MeOH);  $^1\text{H NMR}$  (300 MHz,  $d_6$ -DMSO)  $\delta$  7.38-7.20 (m, 5 H, ArH), 5.94 (t,  $J = 8.3$  Hz, 1 H, CH=), 5.42 (d,  $J = 5.1$  Hz, 1 H), 5.23 (d,  $J = 3.9$  Hz, 1 H), 5.02 (s, 1 H), 4.67 (s, 1 H), 4.30-4.16 (m, 2 H), 3.91 (d,  $J = 13.8$  Hz, 1 H), 3.68 (s, 3 H, Me), 3.34-3.08 (m, 5 H), 2.87 (s, 3 H, Me), 2.30 (dd,  $J_1 = 14.9$  Hz,  $J_2 = 11.6$  Hz, 1 H), 2.16 (d,  $J = 13.2$  Hz, 1 H);  $^{13}\text{C NMR}$  (75 Hz,  $d_6$ -DMSO)  $\delta$  171.7, 145.0, 142.5, 130.0,

128.9, 128.4, 128.0, 108.0, 78.1, 77.7, 74.4, 73.7, 64.5, 56.4, 53.5, 52.6, 35.4, 33.6; IR (neat)  $\nu$  ( $\text{cm}^{-1}$ ) 3406, 3023, 2951, 2921, 1735, 1635, 1461, 1439, 1308, 1251, 1208, 1178, 1097, 1029; MS (ESI,  $m/z$ ) 467 ( $M+\text{COOH}^-$ ); HRMS calcd. for  $\text{C}_{21}\text{H}_{26}\text{O}_9\text{Na}$  ( $M+\text{Na}^+$ ): 445.1469; Found: 445.1478.

The following compounds were prepared according to **Typical Procedure II**.

(2) Preparation of **4b**. (hx-8-141)

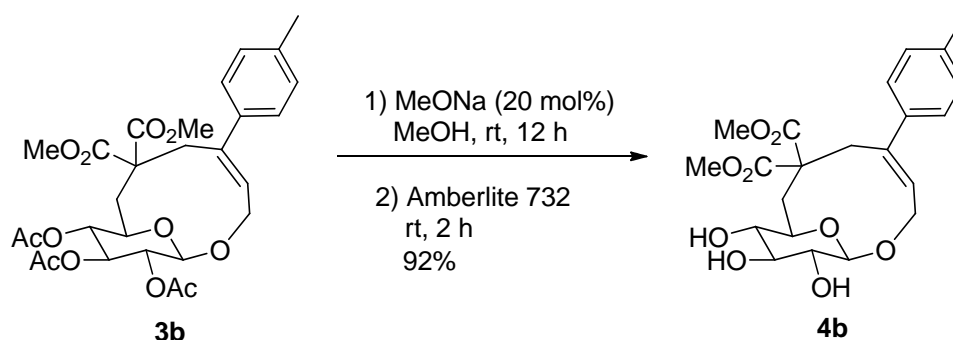

The reaction of **3b** (159.7 mg, 0.284 mmol), and MeONa (3.0 mg, 0.0568 mmol) in MeOH (30.0 mL) at room temperature for 12 h afforded **4b** (114.3 mg, 92%) after filtration of Amberlite 732 (added to quench the reaction with stirring for another 2 h) and chromatography on silica gel (eluent: ethyl acetate/methanol = 6/1) as a syrup:  $[\alpha]_{\text{D}}^{20} = +141.7$  ( $c = 0.52$ , MeOH);  $^1\text{H}$  NMR (300 MHz,  $d_6$ -DMSO)  $\delta$  7.20-7.05 (m, 4 H, ArH), 5.90 (t,  $J = 7.8$  Hz, 1 H, CH=), 5.42 (d,  $J = 5.1$  Hz, 1 H), 5.23 (d,  $J = 4.8$  Hz, 1 H), 5.02 (d,  $J = 2.7$  Hz, 1 H), 4.66 (s, 1 H), 4.30-4.15 (m, 2 H), 3.88 (d,  $J = 13.5$  Hz, 1 H), 3.67 (s, 3 H, Me), 3.35-3.07 (m, 5 H), 2.90 (s, 3 H, Me), 2.38-2.10 (m, 2 H), 2.29 (s, 3 H, Me);  $^{13}\text{C}$  NMR (75 Hz,  $d_6$ -DMSO)  $\delta$  171.8, 144.9, 139.6, 137.7, 129.5, 129.3, 127.9, 108.0, 78.1, 77.7, 74.4, 73.6, 64.5, 56.3, 53.5, 52.7, 35.4, 33.5, 21.7; IR (neat)  $\nu$  ( $\text{cm}^{-1}$ ) 3439, 3024, 2950, 2920, 1732, 1636, 1512, 1439, 1371, 1349, 1309, 1256, 1204, 1177, 1141, 1092, 1032; MS (ESI,  $m/z$ ) 481 ( $M+\text{COOH}^-$ ); HRMS calcd.

for  $C_{22}H_{28}O_9Na$  ( $M+Na^+$ ): 459.1626; Found: 459.1631.

(3) Preparation of **3c**. (hx-8-138)

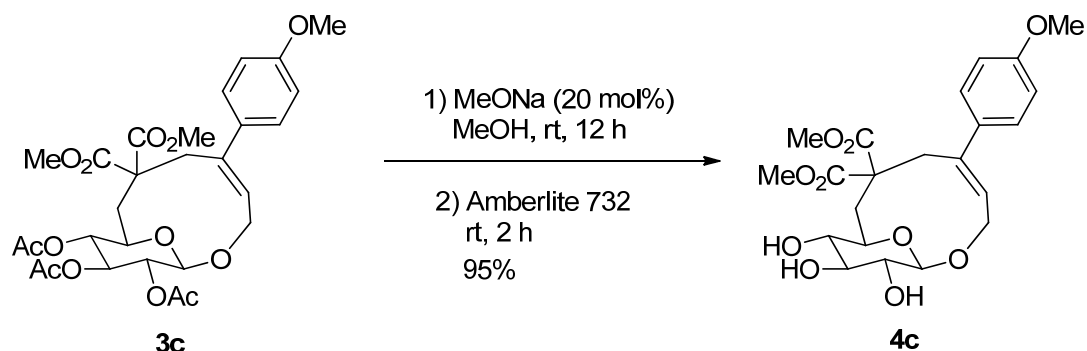

The reaction of **3c** (141.2 mg, 0.244 mmol) and MeONa (2.6 mg, 0.05 mmol) in MeOH (30.0 mL) at room temperature for 12 h afforded **4c** (104.8 mg, 95%) after filtration of Amberlite 732 (added to quench the reaction with stirring for another 2 h) and chromatography on silica gel (eluent: ethyl acetate/methanol = 6/1) as a syrup:  $[\alpha]_D^{20} = +142.5$  ( $c = 0.53$ , MeOH);  $^1H$  NMR (300 MHz,  $d_6$ -DMSO)  $\delta$  7.17 (d,  $J = 8.4$  Hz, 2 H, ArH), 6.87 (d,  $J = 8.4$  Hz, 2 H, ArH), 5.87 (t,  $J = 8.1$  Hz, 1 H, CH=), 5.40 (d,  $J = 5.1$  Hz, 1 H), 5.21 (d,  $J = 4.2$  Hz, 1 H), 5.00 (s, 1 H), 4.65 (s, 1 H), 4.30-4.14 (m, 2 H), 3.88 (d,  $J = 13.5$  Hz, 1 H), 3.76 (s, 3 H, Me), 3.68 (s, 3 H, Me), 3.34-3.07 (m, 5 H), 2.97 (s, 3 H, Me), 2.34-2.10 (m, 2 H);  $^{13}C$  NMR (75 Hz,  $d_6$ -DMSO)  $\delta$  171.81, 171.76, 159.7, 144.5, 134.7, 129.1, 128.7, 114.3, 108.0, 78.1, 77.7, 74.4, 73.6, 64.5, 56.3, 56.1, 53.5, 52.8, 35.3, 33.6; IR (neat)  $\nu$  ( $cm^{-1}$ ) 3436, 2950, 2926, 2838, 1732, 1607, 1572, 1511, 1441, 1376, 1309, 1289, 1250, 1205, 1183, 1142, 1092, 1032; MS (ESI,  $m/z$ ) 497 ( $M+COOH^-$ ); HRMS calcd. for  $C_{22}H_{28}O_{10}Na$  ( $M+Na^+$ ): 475.1575; Found: 475.1581.

(4) Preparation of **4d**. (hx-8-124)



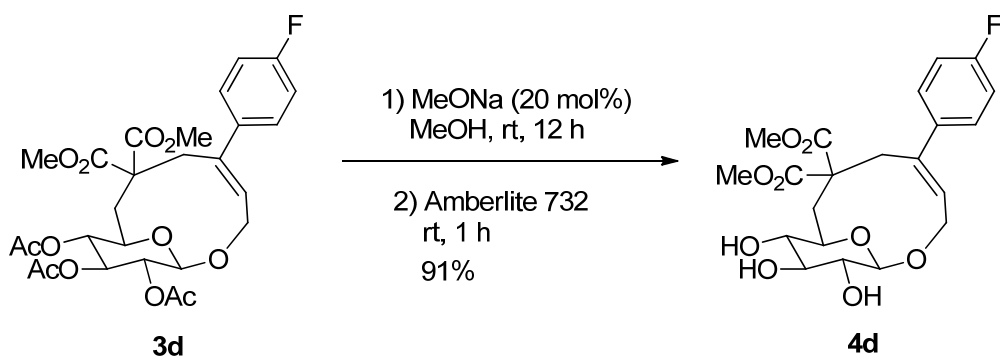

The reaction of **3d** (231.2 mg, 0.41 mmol) and MeONa (4.5 mg, 0.082 mmol) in MeOH (30.0 mL) at room temperature for 12 h afforded **4d** (163.0 mg, 91%) after filtration of Amberlite 732 (added to quench the reaction with stirring for another 1 h) and chromatography on silica gel (eluent: ethyl acetate/methanol = 6/1) as a syrup:  $[\alpha]_D^{20} = +125.4$  ( $c = 0.32$ , MeOH);  $^1\text{H NMR}$  (300 MHz,  $d_6$ -DMSO)  $\delta$  7.40-7.06 (m, 4 H, ArH), 5.92 (t,  $J = 7.4$  Hz, 1 H, CH=), 5.42 (d,  $J = 3.9$  Hz, 1 H), 5.23 (d,  $J = 3.3$  Hz, 1 H), 5.03 (s, 1 H), 4.66 (s, 1 H), 4.33-4.12 (m, 2 H), 3.90 (d,  $J = 13.8$  Hz, 1 H), 3.68 (s, 3 H, Me), 3.36-3.05 (m, 5 H), 2.96 (s, 3 H, Me), 2.36-2.09 (m, 2 H);  $^{13}\text{C NMR}$  (75 Hz,  $d_6$ -DMSO)  $\delta$  171.8, 171.7, 162.6 (d,  $J = 242.6$  Hz), 143.9, 138.9, 130.2, 130.1 (d,  $J = 8.3$  Hz), 115.7 (d,  $J = 21.4$  Hz), 108.0, 78.0, 77.7, 74.5, 73.7, 64.5, 56.3, 53.6, 52.8, 35.4, 33.7;  $^{19}\text{F NMR}$  (282 MHz,  $d_6$ -DMSO)  $\delta$  -114.3 (s, 1 F); IR (neat)  $\nu$  ( $\text{cm}^{-1}$ ) 3433, 3319, 2953, 2931, 2891, 1732, 1628, 1601, 1508, 1475, 1444, 1378, 1321, 1262, 1221, 1205, 1184, 1091, 1033; MS (ESI,  $m/z$ ) 485 ( $\text{M} + \text{COOH}^-$ ); HRMS calcd. for  $\text{C}_{21}\text{H}_{25}\text{FO}_9\text{Cl}^{35}$  ( $\text{M} + (^{35}\text{Cl})^-$ ): 475.1177; Found: 475.1173.

(5) Preparation of **4e** (hx-8-142)

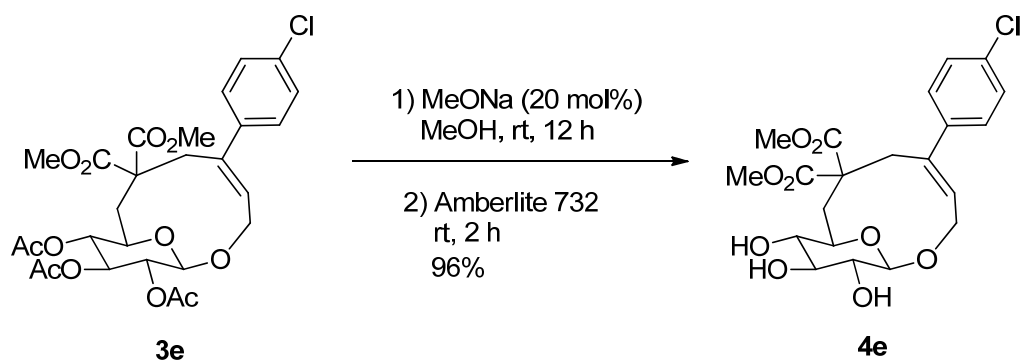

The reaction of **3e** (171.0 mg, 0.294 mmol) and MeONa (3.3 mg, 0.059 mmol) in MeOH (30.0 mL) at room temperature for 12 h afforded **4e** (128.8 mg, 96%) after filtration of Amberlite 732 (added to quench the reaction with stirring for another 2 h) and chromatography on silica gel (eluent: ethyl acetate/methanol = 6/1) as a syrup:  $[\alpha]_D^{20} = +140.4$  ( $c = 0.43$ , MeOH);  $^1\text{H NMR}$  (300 MHz,  $d_6$ -DMSO)  $\delta$  7.38 (d,  $J = 8.4$  Hz, 2 H, ArH), 7.27 (d,  $J = 7.8$  Hz, 2 H, ArH), 5.96 (t,  $J = 8.0$  Hz, 1 H), 5.41 (d,  $J = 4.2$  Hz, 1 H), 5.22 (s, 1 H), 5.01 (s, 1 H), 4.66 (s, 1 H), 4.30-4.14 (m, 2 H), 3.91 (d,  $J = 14.1$  Hz, 1 H), 3.68 (s, 3 H, Me), 3.35-3.06 (m, 5 H), 2.96 (s, 3 H, Me), 2.32-2.10 (m, 2 H);  $^{13}\text{C NMR}$  (75 Hz,  $d_6$ -DMSO)  $\delta$  171.8, 171.6, 143.8, 141.4, 133.1, 130.6, 129.9, 128.9, 108.0, 78.0, 77.6, 74.4, 73.7, 64.4, 56.4, 53.6, 52.7, 35.4, 33.5; IR (neat)  $\nu$  ( $\text{cm}^{-1}$ ) 3435, 2951, 2890, 1732, 1629, 1491, 1475, 1439, 1401, 1377, 1349, 1310, 1257, 1207, 1139, 1092, 1032; MS (ESI,  $m/z$ ) 503 ( $M(^{37}\text{Cl})+\text{COOH}^-$ ), 501 ( $M(^{35}\text{Cl})+\text{COOH}^-$ ); HRMS calcd. for  $\text{C}_{21}\text{H}_{25}^{35}\text{ClO}_9\text{Na}$  ( $M(^{35}\text{Cl}) + \text{Na}^+$ ): 479.1079; Found: 479.1083.

(6) Preparation of **4f**. (hx-8-123)

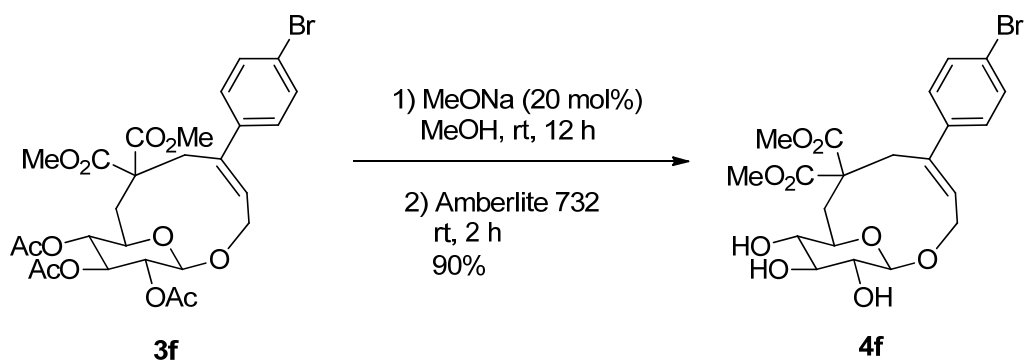

The reaction of **3f** (848.5 mg, 1.35 mmol) and MeONa (14.7 mg, 0.27 mmol) in MeOH (50.0 mL) at room temperature for 12 h afforded **4f** (608.7 mg, 90%) after filtration of Amberlite 732 (added to quench the reaction with stirring for another 2 h) and chromatography on silica gel (eluent: ethyl acetate/methanol = 6/1) as a syrup:  $[\alpha]_D^{20} = +131.2$  ( $c = 0.72$ , MeOH);  $^1\text{H NMR}$  (300 MHz,  $d_6$ -DMSO)  $\delta$  7.51 (d,  $J = 8.7$  Hz, 2 H, ArH), 7.21 (d,  $J = 8.4$  Hz, 2 H, ArH), 5.96 (t,  $J = 8.3$  Hz, 1 H, CH=), 5.42 (d,  $J = 5.4$  Hz, 1 H), 5.24 (d,  $J = 5.1$  Hz, 1 H), 5.03 (d,  $J = 3.9$  Hz, 1 H), 4.66 (d,  $J = 1.2$  Hz, 1 H), 4.30-4.15 (m, 2 H), 3.90 (d,  $J = 13.8$  Hz, 1 H), 3.68 (s, 3 H, Me), 3.33-3.07 (m, 5 H), 2.96 (s, 3 H, Me), 2.33-2.10 (m, 2 H);  $^{13}\text{C NMR}$  (75 Hz,  $d_6$ -DMSO)  $\delta$  171.7, 171.6, 143.8, 141.7, 131.8, 130.6, 130.2, 121.6, 108.0, 78.0, 77.6, 74.4, 73.6, 64.3, 56.3, 53.5, 52.7, 35.4, 33.4; IR (neat)  $\nu$  ( $\text{cm}^{-1}$ ) 3435, 2951, 2917, 1734, 1486, 1438, 1352, 1310, 1252, 1207, 1180, 1091, 1031, 1010; MS (ESI,  $m/z$ ) 547 ( $M(^{81}\text{Br})+\text{COOH}^-$ ), 545 ( $M(^{79}\text{Br})+\text{COOH}^-$ ); HRMS calcd. for  $\text{C}_{21}\text{H}_{25}^{79}\text{BrO}_9^{35}\text{Cl}$  ( $M(^{79}\text{Br})+(^{35}\text{Cl})^-$ ): 535.0376; Found: 535.0358.

(7) Preparation of **4g**. (Hx-8-127)

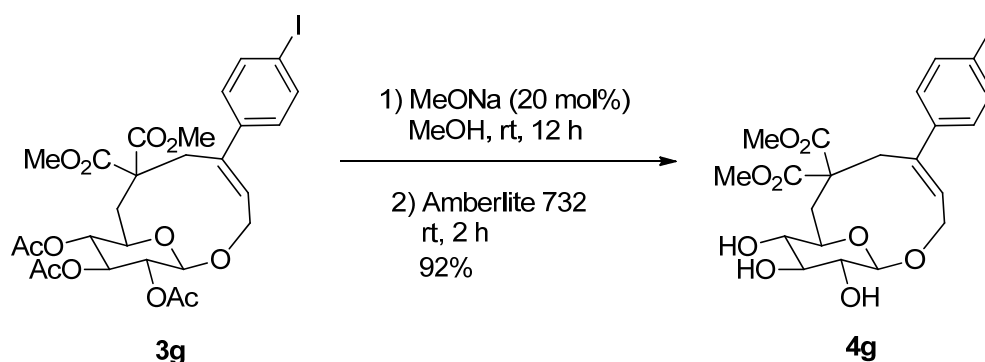

The reaction of **3g** (441.7 mg, 0.655 mmol) and MeONa (7.0 mg, 0.13 mmol) in MeOH (40.0 mL) at room temperature for 12 h afforded **4g** (331.3 mg, 92%) after filtration of Amberlite 732 (added to quench the reaction with stirring for another 2 h) and chromatography on silica gel (eluent: ethyl acetate/methanol = 6/1) as a syrup:  $[\alpha]_D^{20} = +129.9$  ( $c = 0.50$ , MeOH);  $^1\text{H NMR}$  (300 MHz,  $d_6$ -DMSO)  $\delta$  7.68 (d,  $J = 8.4$  Hz, 2 H, ArH), 7.05 (d,  $J = 8.1$  Hz, 2 H, ArH), 5.95 (t,  $J = 8.1$  Hz, 1 H, CH=), 5.40 (d,  $J = 4.5$  Hz, 1 H), 5.21 (d,  $J = 3.6$  Hz, 1 H), 5.01 (s, 1 H), 4.66 (s, 1 H), 4.30-4.15 (m, 2 H), 3.89 (d,  $J = 14.1$  Hz, 1 H), 3.68 (s, 3 H, Me), 3.34-3.06 (m, 5 H), 2.95 (s, 3 H, Me), 2.33-2.10 (m, 2 H);  $^{13}\text{C NMR}$  (75 Hz,  $d_6$ -DMSO)  $\delta$  171.8, 171.6, 144.0, 142.1, 137.7, 130.5, 130.3, 108.0, 94.5, 78.0, 77.6, 74.4, 73.6, 64.4, 56.3, 53.6, 52.7, 35.4, 33.4; IR (neat)  $\nu$  ( $\text{cm}^{-1}$ ) 3524, 3472, 3429, 2950, 2925, 1735, 1720, 1437, 1382, 1309, 1259, 1204, 1128, 1091, 1028, 1005; MS (ESI,  $m/z$ ) 593 ( $\text{M}+\text{COOH}^-$ ); HRMS calcd. for  $\text{C}_{21}\text{H}_{25}\text{IO}_9^{35}\text{Cl}$  ( $\text{M}+(\text{}^{35}\text{Cl})^-$ ): 583.0237; Found: 583.0245.

(8) Preparation of **4h**. (Hx-8-137)

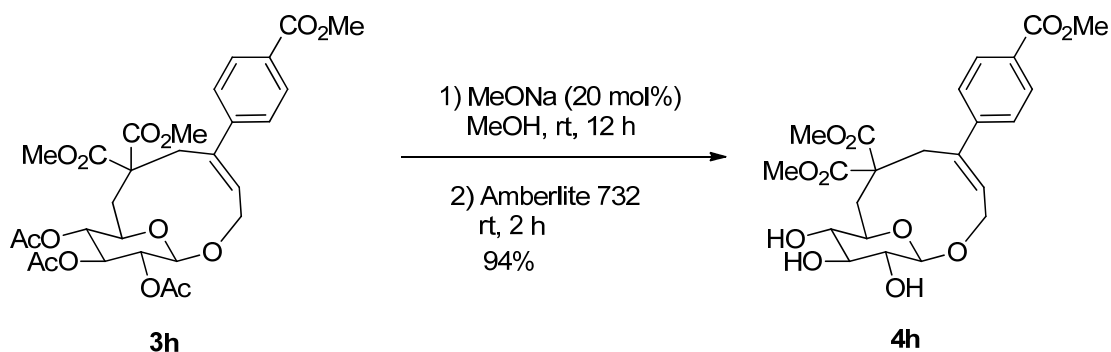

The reaction of **3h** (319.6 mg, 0.527 mmol) and MeONa (5.7 mg, 0.105 mmol) in MeOH (30.0 mL) at room temperature for 12 h afforded **4h** (238.8 mg, 94%) after filtration of Amberlite 732 (added to quench the reaction with stirring for another 2 h) and chromatography on silica gel (eluent: ethyl acetate/methanol = 6/1) as a syrup:  $[\alpha]_D^{20} = +160.6$  ( $c = 0.325$ , MeOH);  $^1\text{H NMR}$  (300 MHz,  $d_6$ -DMSO)  $\delta$  7.91 (d,  $J = 8.1$  Hz, 2 H, ArH), 7.40 (d,  $J = 8.1$  Hz, 2 H, ArH), 6.04 (t,  $J = 7.8$  Hz, 1 H, CH=), 5.42 (d,  $J = 4.8$  Hz, 1 H), 5.23 (d,  $J = 4.5$  Hz, 1 H), 5.03 (s, 1 H), 4.68 (s, 1 H), 4.33-4.14 (m, 2 H), 3.94 (d,  $J = 14.1$  Hz, 1 H), 3.87 (s, 3 H, Me), 3.68 (s, 3 H, Me), 3.36-3.08 (m, 5 H), 2.88 (s, 3 H, Me), 2.34-2.09 (m, 2 H);  $^{13}\text{C NMR}$  (75 Hz,  $d_6$ -DMSO)  $\delta$  164.04, 163.95, 159.7, 139.9, 136.6, 123.2, 121.8, 121.7, 120.2, 99.6, 70.0, 69.4, 66.4, 66.3, 56.4, 48.9, 44.6, 44.1, 43.9, 27.5, 25.3; IR (neat)  $\nu$  ( $\text{cm}^{-1}$ ) 3524, 3488, 3427, 3003, 2953, 2921, 2887, 1720, 1608, 1437, 1407, 1353, 1310, 1278, 1203, 1184, 1106, 1027; MS (ESI,  $m/z$ ) 525 ( $\text{M}+\text{COOH}^-$ ); HRMS calcd. for  $\text{C}_{23}\text{H}_{28}\text{O}_{11}\text{Na}$  ( $\text{M}+\text{Na}^+$ ): 503.1524; Found: 503.1535.

(9) Preparation of **4i**. (hx-8-128)

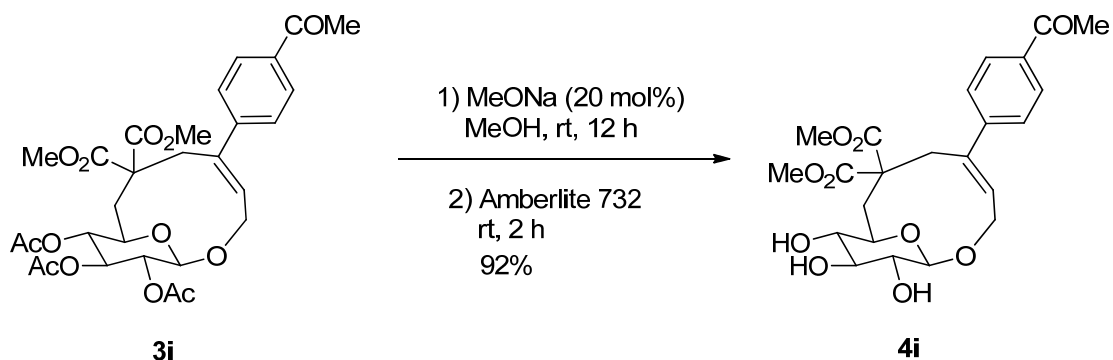

The reaction of **3i** (360.2 mg, 0.61 mmol) and MeONa (6.5 mg, 0.122 mmol) in MeOH (30.0 mL) at room temperature for 12 h afforded **4i** (260.1 mg, 92%) after filtration of Amberlite 732 (added to quench the reaction with stirring for another 2 h) and chromatography on silica gel (eluent: ethyl acetate/methanol = 6/1) as a syrup:  $[\alpha]_D^{20} = +149.4$  ( $c = 0.345$ , MeOH);  $^1\text{H NMR}$  (300 MHz,  $d_6$ -DMSO)  $\delta$  7.91 (d,  $J = 8.4$  Hz, 2 H, ArH), 7.40 (d,  $J = 8.1$  Hz, 2 H, ArH), 6.04 (t,  $J = 8.1$  Hz, 1 H, CH=), 5.45 (s, 1 H), 5.26 (s, 1 H), 5.08 (s, 1 H), 4.68 (s, 1 H), 4.33-4.16 (m, 2 H), 3.94 (d,  $J = 14.1$  Hz, 1 H), 3.68 (s, 3 H, Me), 3.36-3.05 (m, 5 H), 2.88 (s, 3 H, Me), 2.59 (s, 3 H, Me), 2.34-2.10 (m, 2 H);  $^{13}\text{C NMR}$  (75 Hz,  $d_6$ -DMSO)  $\delta$  198.6, 171.8, 171.6, 147.3, 144.2, 136.7, 131.5, 128.9, 128.3, 108.1, 78.0, 77.6, 74.4, 73.6, 64.3, 56.3, 53.6, 52.7, 35.4, 33.4, 27.8; IR (neat)  $\nu$  ( $\text{cm}^{-1}$ ) 3436, 3315, 2930, 2888, 1729, 1681, 1625, 1602, 1560, 1476, 1444, 1402, 1382, 1366, 1319, 1307, 1268, 1243, 1224, 1204, 1182, 1140, 1118, 1093, 1033; MS (ESI,  $m/z$ ) 509 ( $\text{M}+\text{COOH}^-$ ); HRMS calcd. for  $\text{C}_{23}\text{H}_{28}\text{O}_{10}^{35}\text{Cl}$  ( $\text{M}+(\text{}^{35}\text{Cl})^-$ ): 499.1376; Found: 499.1378.

(10) Preparation of **4j**. (Hx-8-129)

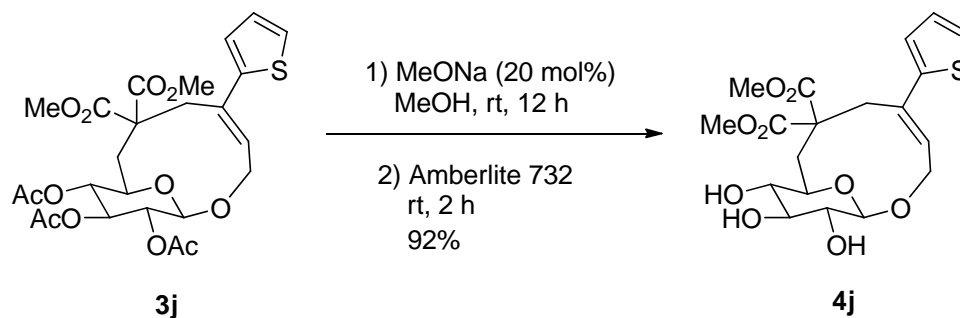

The reaction of **3j** (360.3 mg, 0.66 mmol) and MeONa (7.0 mg, 0.132 mmol) in MeOH (30.0 mL) at room temperature for 12 h afforded **4j** (256.8 mg, 92%) after filtration of Amberlite 732 (added to quench the reaction with stirring for another 2 h) and chromatography on silica gel (eluent: ethyl acetate/methanol = 6/1) as a syrup:  $[\alpha]_D^{20} = +161.3$  ( $c = 0.395$ , MeOH);  $^1\text{H NMR}$  (300 MHz,  $d_6$ -DMSO)  $\delta$  7.42 (d,  $J = 4.8$  Hz, 1 H, ArH), 7.05-6.95 (m, 2 H, ArH), 6.12 (t,  $J = 8.3$  Hz, 1 H, CH=), 5.41 (d,  $J = 5.1$  Hz, 1 H), 5.23 (d,  $J = 4.5$  Hz, 1 H), 5.01 (d,  $J = 1.8$  Hz, 1 H), 4.64 (s, 1 H), 4.30-4.15 (m, 2 H), 3.91 (d,  $J = 13.8$  Hz, 1 H), 3.70 (s, 3 H, Me), 3.38-3.05 (m, 5 H), 3.19 (s, 3 H, Me), 2.30 (dd,  $J_1 = 14.7$  Hz,  $J_2 = 11.7$  Hz, 1 H), 2.17 (d,  $J = 13.5$  Hz, 1 H);  $^{13}\text{C NMR}$  (75 Hz,  $d_6$ -DMSO)  $\delta$  172.2, 171.7, 145.0, 138.1, 129.2, 128.2, 126.3, 125.7, 108.0, 78.1, 77.6, 74.3, 73.5, 64.2, 56.5, 53.5, 52.9, 35.5, 34.4; IR (neat)  $\nu$  ( $\text{cm}^{-1}$ ) 3482, 3387, 2950, 2922, 1735, 1629, 1462, 1437, 1370, 1346, 1306, 1247, 1197, 1176, 1096, 1030; MS (ESI,  $m/z$ ) 473 ( $M+\text{COOH}^-$ ); HRMS calcd. for  $\text{C}_{19}\text{H}_{24}\text{O}_9\text{SNa}$  ( $M+\text{Na}^+$ ):451.1033; Found: 451.1034.

(11) Preparation of **4k**. (Hx-8-136)

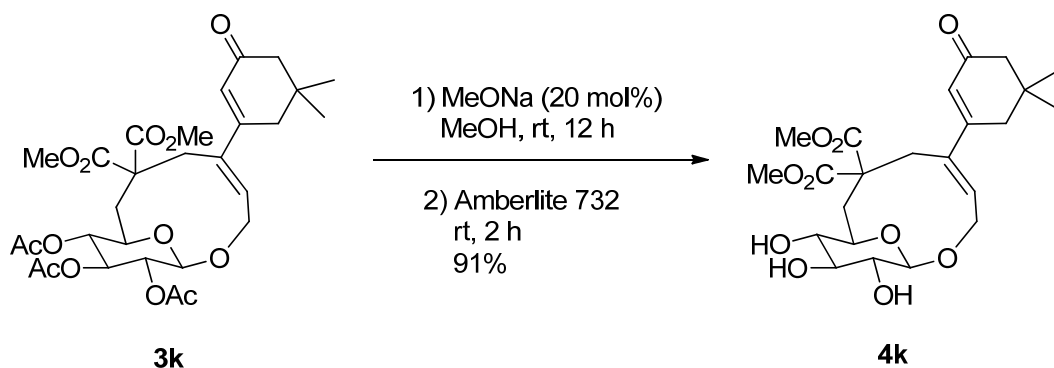

The reaction of **3k** (165.8 mg, 0.28 mmol) and MeONa (3.1 mg, 0.056 mmol) in MeOH (30.0 mL) at room temperature for 12 h afforded **4k** (119.2 mg, 91%) after filtration of Amberlite 732 (added to quench the reaction with stirring for another 2 h) and chromatography on silica gel (eluent: ethyl acetate/methanol = 6/1) as a syrup:  $[\alpha]_D^{20} = +133.0$  ( $c = 0.345$ , MeOH);  $^1\text{H NMR}$  (300 MHz,  $d_6$ -DMSO)  $\delta$  6.32 (t,  $J = 8.4$  Hz, 1 H, CH=), 5.84 (s, 1 H, CH=), 5.41 (d,  $J = 5.1$  Hz, 1 H), 5.24 (d,  $J = 5.1$  Hz, 1 H), 5.02 (d,  $J = 3.3$  Hz, 1 H), 4.63 (s, 1 H), 4.19 (d,  $J = 8.1$  Hz, 2 H), 3.78 (d,  $J = 14.1$  Hz, 1 H), 3.72 (s, 3 H, Me), 3.48 (s, 3 H, Me), 3.33-3.04 (m, 4 H), 2.94 (d,  $J = 14.1$  Hz, 1 H), 2.59 (d,  $J = 18.0$  Hz, 1 H), 2.28-2.05 (m, 5 H), 1.03 (s, 3 H, Me), 0.98 (s, 3 H, Me);  $^{13}\text{C NMR}$  (75 Hz,  $d_6$ -DMSO)  $\delta$  200.2, 172.6, 171.5, 159.4, 143.4, 131.3, 124.3, 108.0, 77.8, 77.6, 74.5, 73.4, 64.1, 56.1, 53.6, 53.2, 51.5, 42.5, 35.5, 34.1, 31.8, 29.3, 28.3; IR (neat)  $\nu$  ( $\text{cm}^{-1}$ ) 3431, 2955, 1734, 1655, 1593, 1438, 1369, 1307, 1249, 1202, 1178, 1145, 1093, 1031; MS (ESI,  $m/z$ ) 513 ( $\text{M}+\text{COOH}^-$ ); HRMS calcd. for  $\text{C}_{23}\text{H}_{32}\text{O}_{10}\text{Na}$  ( $\text{M}+\text{Na}^+$ ): 491.1888; Found: 491.1901.

### 3. Synthesis of **5**.<sup>[2]</sup> (hx-7-45)



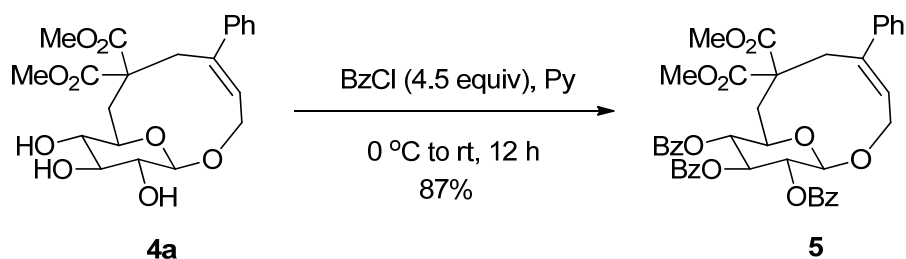

To a flame-dried Schlenk tube were added **4a** (169.6 mg, 0.4 mmol) and pyridine (2.0 mL). After BzCl (0.21 mL,  $d = 1.212\text{ g/mL}$ , 1.8 mmol) was injected by a syringe at  $0\text{ }^{\circ}\text{C}$ , the resulting solution was allowed to warm up to room temperature and stirred for 12 hours as monitored by TLC. Then it was diluted with DCM (30 mL) and washed by 10 mL of diluted hydrochloric acid (3 M). The organic layer was separated and the aqueous layer was extracted with DCM (20 mL  $\times$  2). The combined organic layer was then washed with brine and dried over with anhydrous  $\text{Na}_2\text{SO}_4$ . After filtration and concentration, chromatography on silica gel (eluent: petroleum ether/ethyl acetate = 3/1) afforded **5** (256.1 mg, 87%) as a solid: M.P.  $184\text{--}185\text{ }^{\circ}\text{C}$  (*n*-hexane/EtOAc);  $[\alpha]_{\text{D}}^{20} = +60.7$  ( $c = 1.215$ ,  $\text{CHCl}_3$ );  $^1\text{H NMR}$  (300 MHz,  $\text{CDCl}_3$ )  $\delta$  8.13–8.00 (m, 4 H, ArH), 7.93 (d,  $J = 7.5\text{ Hz}$ , 2 H, ArH), 7.60–7.20 (m, 15 H, ArH), 6.06 (t,  $J = 8.0\text{ Hz}$ , 1 H, CH=), 5.79 (t,  $J = 6.0\text{ Hz}$ , 1 H), 5.49–5.37 (m, 2 H), 5.17 (s, 1 H), 4.58–4.32 (m, 2 H), 4.07 (dd,  $J_1 = 11.4\text{ Hz}$ ,  $J_2 = 3.0\text{ Hz}$ , 1 H), 3.95 (d,  $J = 13.8\text{ Hz}$ , 1 H), 3.73 (s, 3 H, Me), 3.36 (d,  $J = 14.1\text{ Hz}$ , 1 H), 3.26 (dd,  $J_1 = 14.9\text{ Hz}$ ,  $J_2 = 12.5\text{ Hz}$ , 1 H), 2.82 (s, 3 H, Me), 2.32 (d,  $J = 15.0\text{ Hz}$ , 1 H);  $^{13}\text{C NMR}$  (75 Hz,  $\text{CDCl}_3$ )  $\delta$  171.1, 170.4, 165.32, 165.26, 165.1, 145.0, 141.7, 133.3, 133.2, 129.93, 129.88, 129.7, 129.15, 129.11, 129.0, 128.5, 128.3, 128.2, 127.8, 127.5, 127.3, 100.4, 73.9, 71.4, 71.3, 68.1, 63.8, 56.4, 52.5, 51.7, 34.1, 32.8; IR (KBr)  $\nu$  ( $\text{cm}^{-1}$ ) 2953, 1736, 1720, 1602, 1584, 1492, 1452, 1308, 1264, 1201, 1181, 1164, 1114, 1090, 1070, 1028; MS

(ESI, m/z) 757 (M+Na<sup>+</sup>), 752 (M+NH<sub>4</sub><sup>+</sup>); Anal. Calcd. for C<sub>42</sub>H<sub>38</sub>O<sub>12</sub> (%): C 68.66, H

5.21; Found: C 68.77, H 5.27.

## References

- [1] Pietrzik, N.; Schmollinger, D.; Ziegler, T. *Beilstein J. Org. Chem.* **2008**, *4*, No. 30.
- [2] P. Verma, B. Mukhopadhyay, *Carbohydrate Research* **2009**, *344*, 2554.

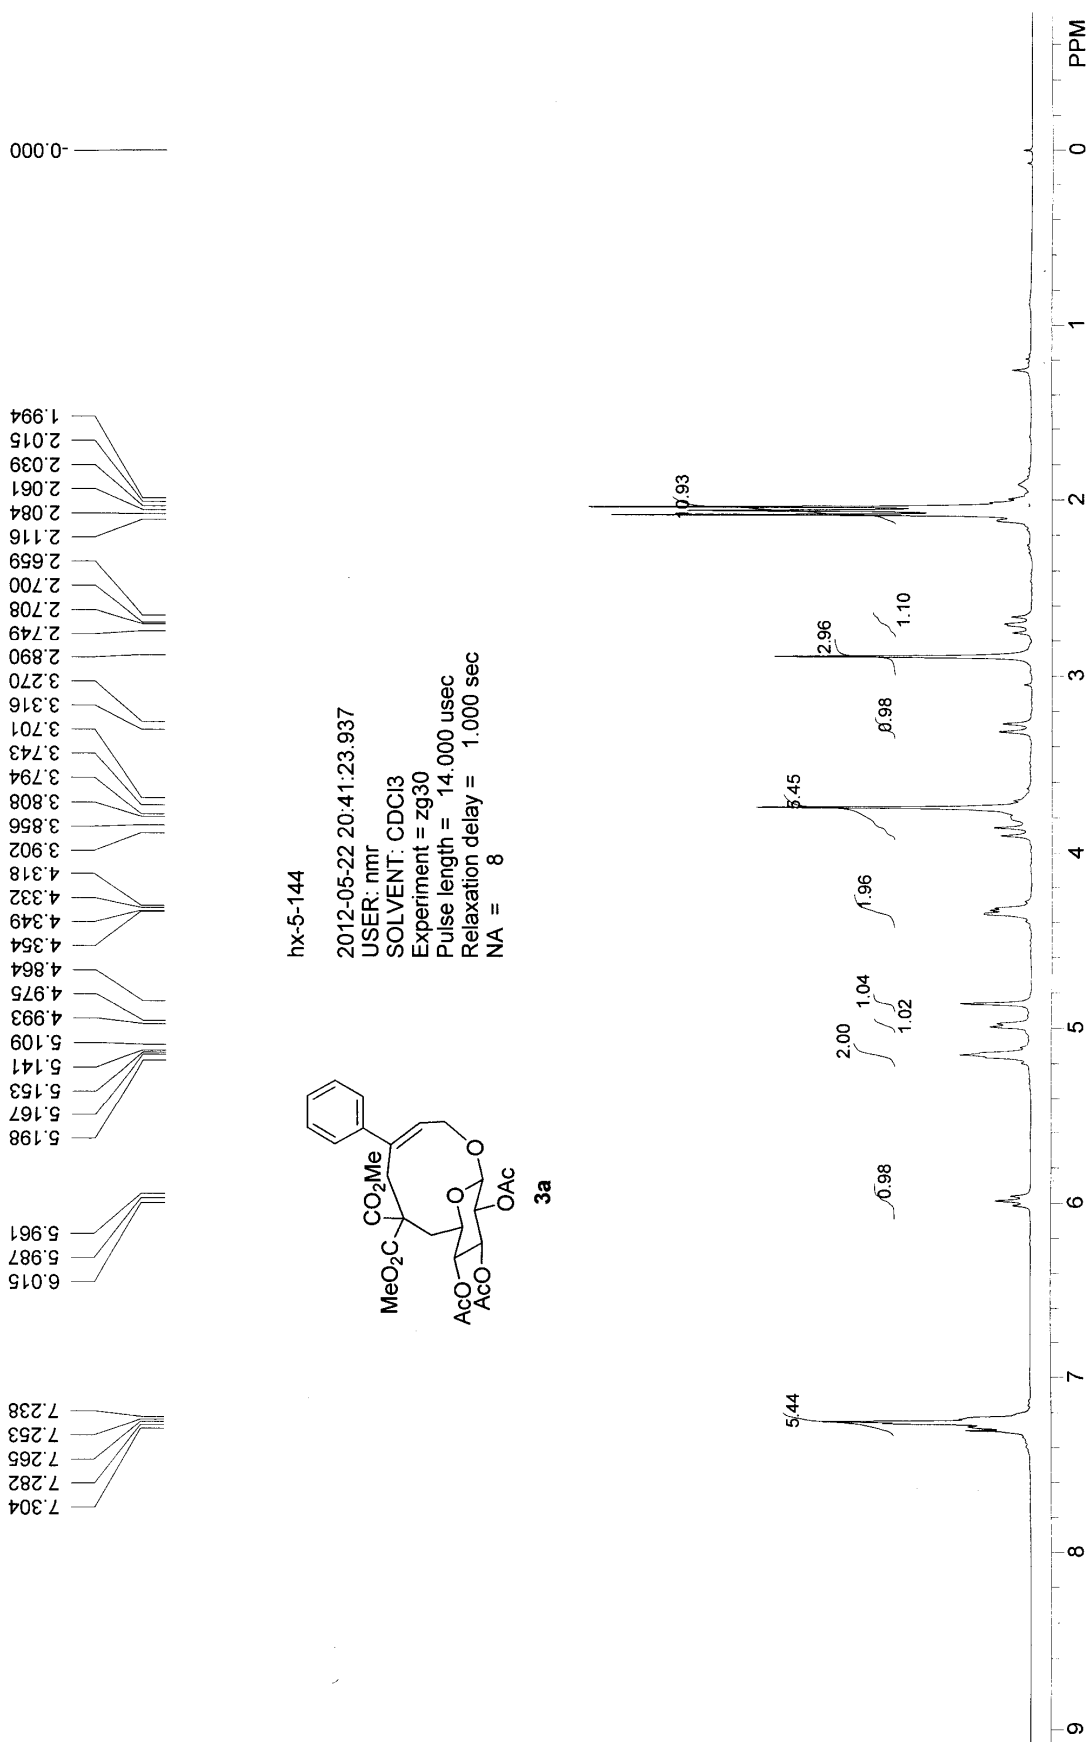

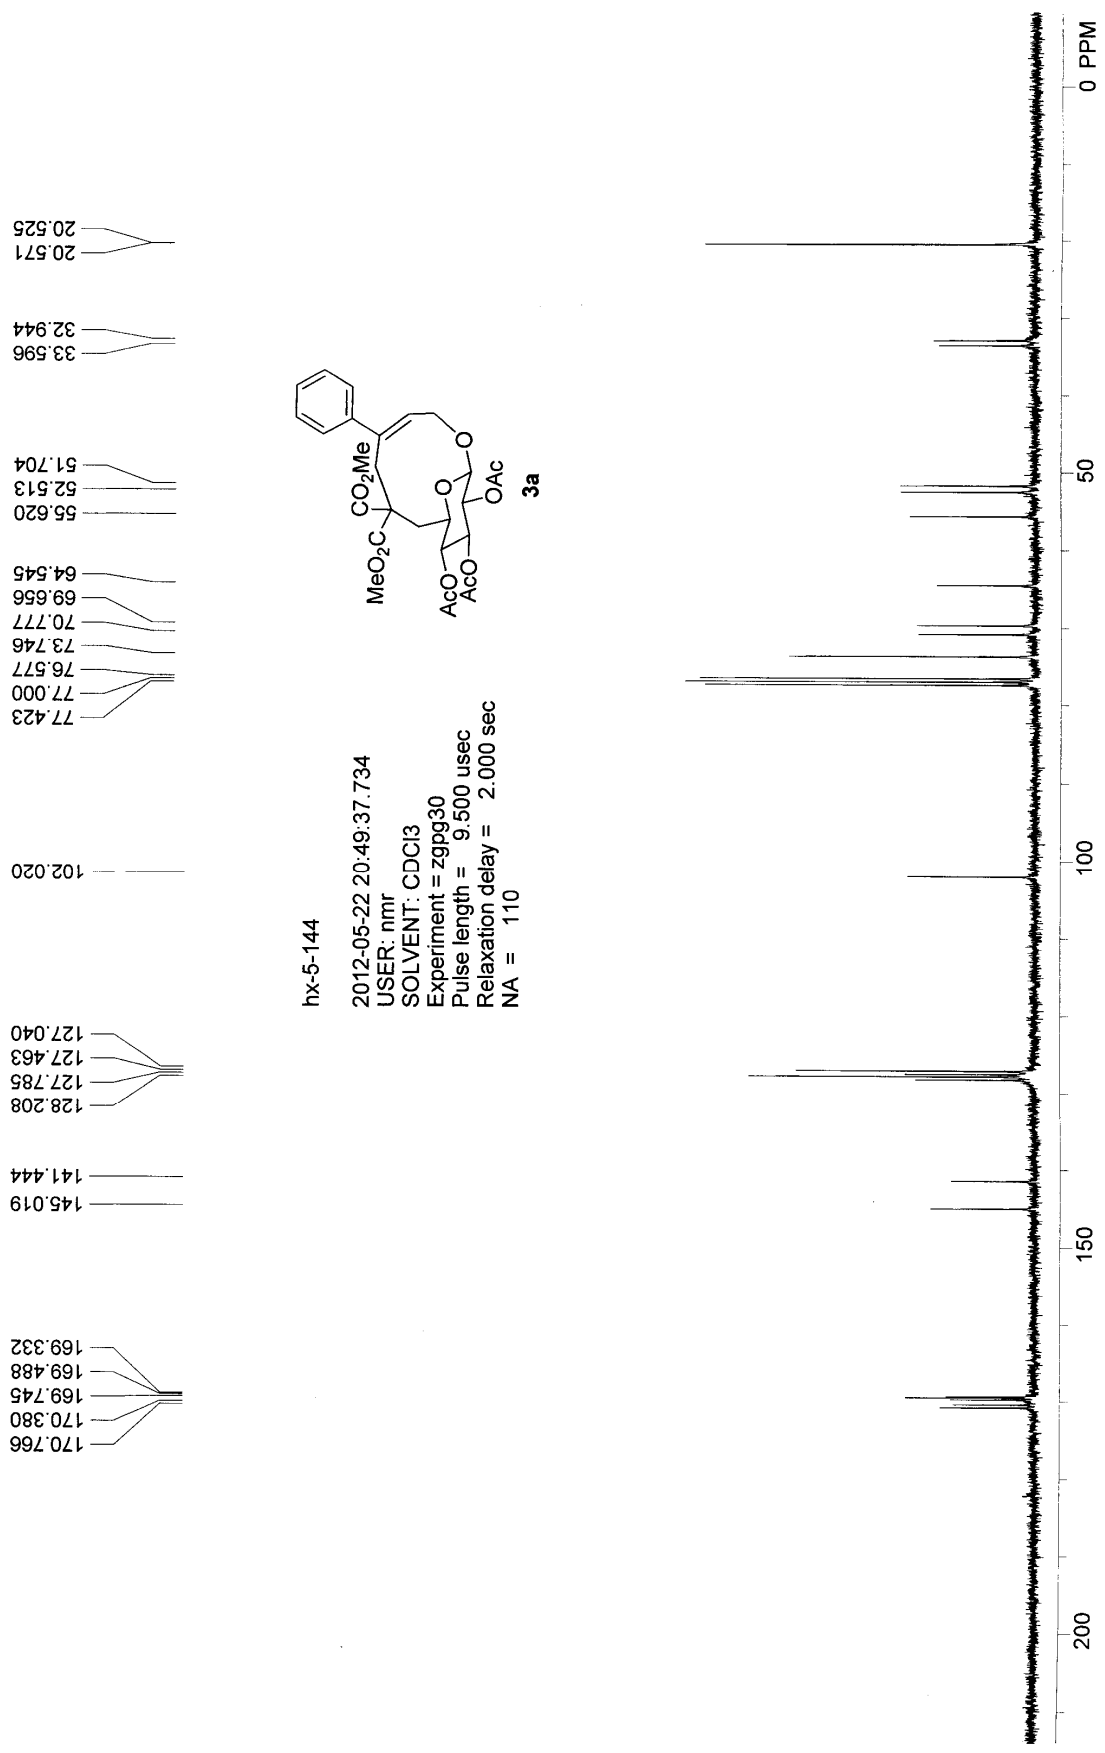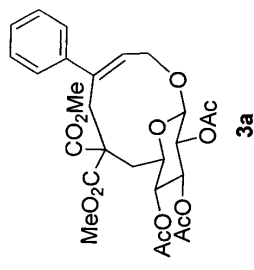

hx-5-144  
 2012-05-22 20:49:37.734  
 USER: nmr  
 SOLVENT: CDCl3  
 Experiment = zgpg30  
 Pulse length = 9.500 usec  
 Relaxation delay = 2.000 sec  
 NA = 110

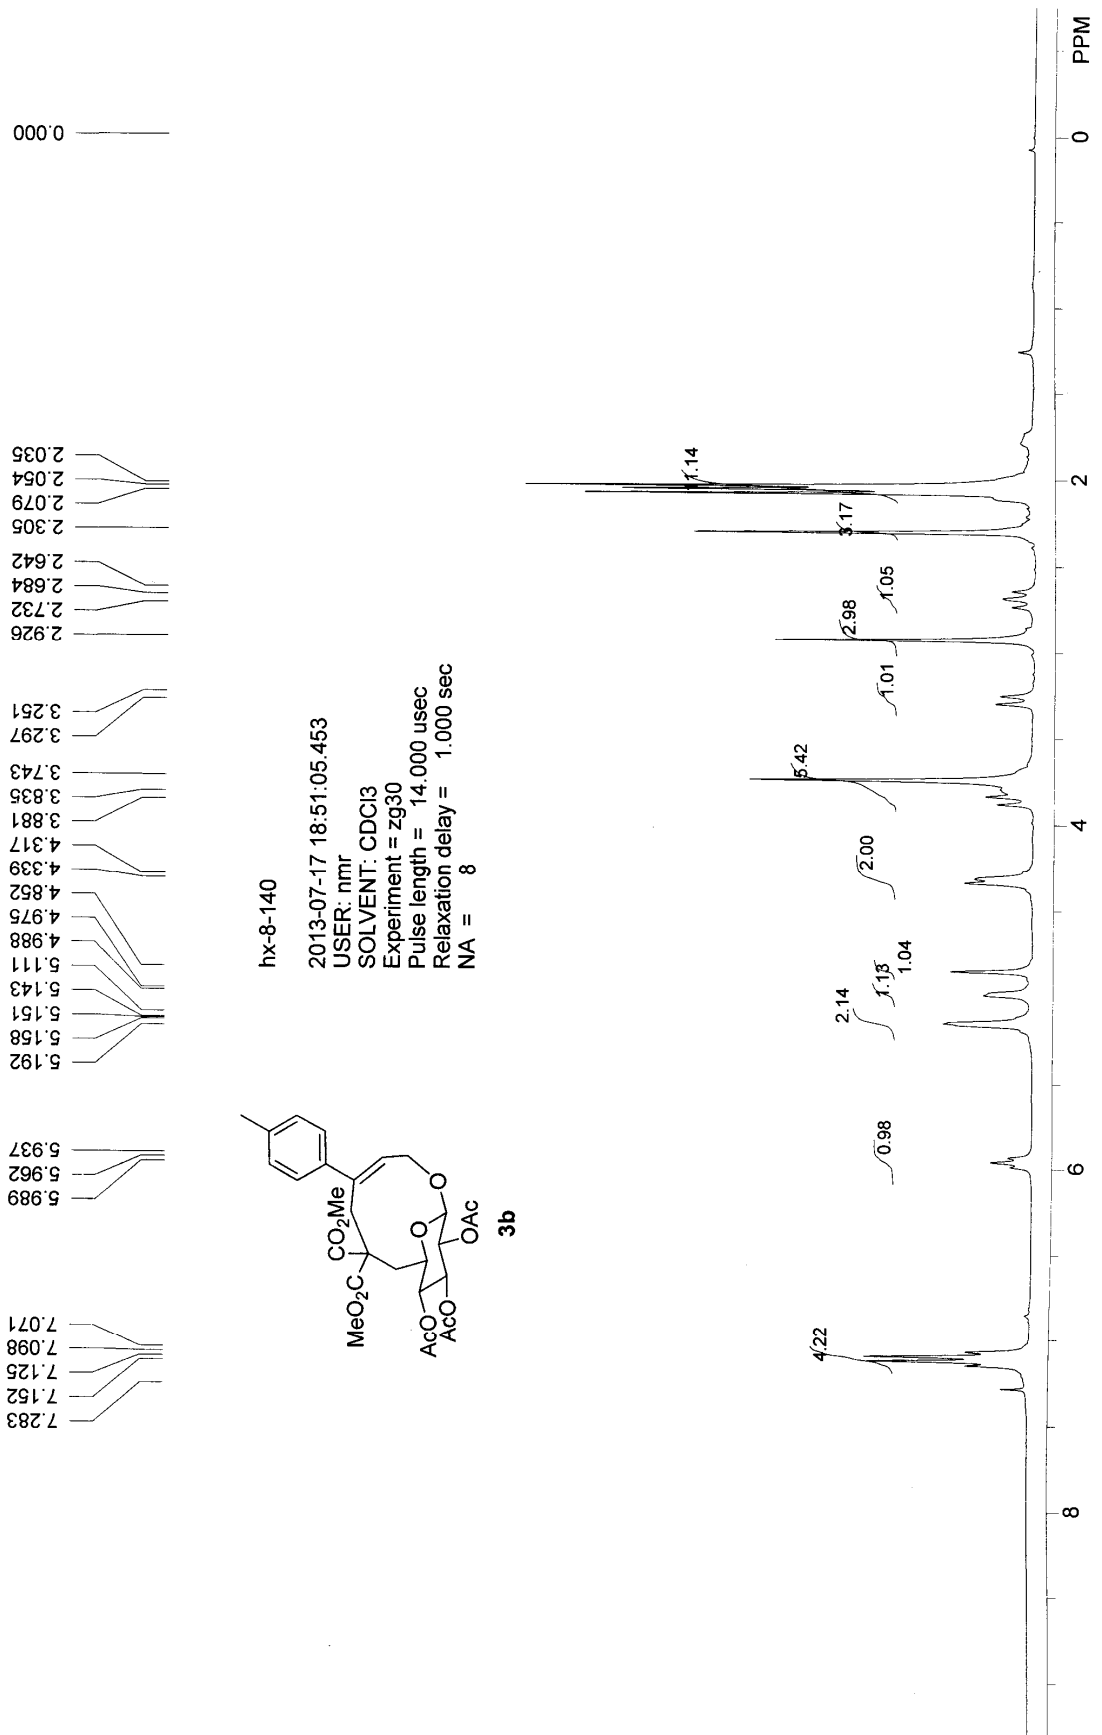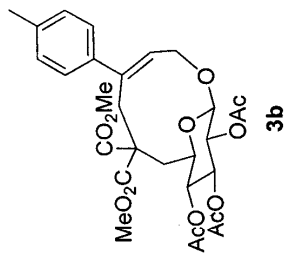

hx-8-140

2013-07-17 18:51:05.453

USER: nmr

SOLVENT: CDCl3

Experiment = zg30

Pulse length = 14.000 usec

Relaxation delay = 1.000 sec

NA = 8

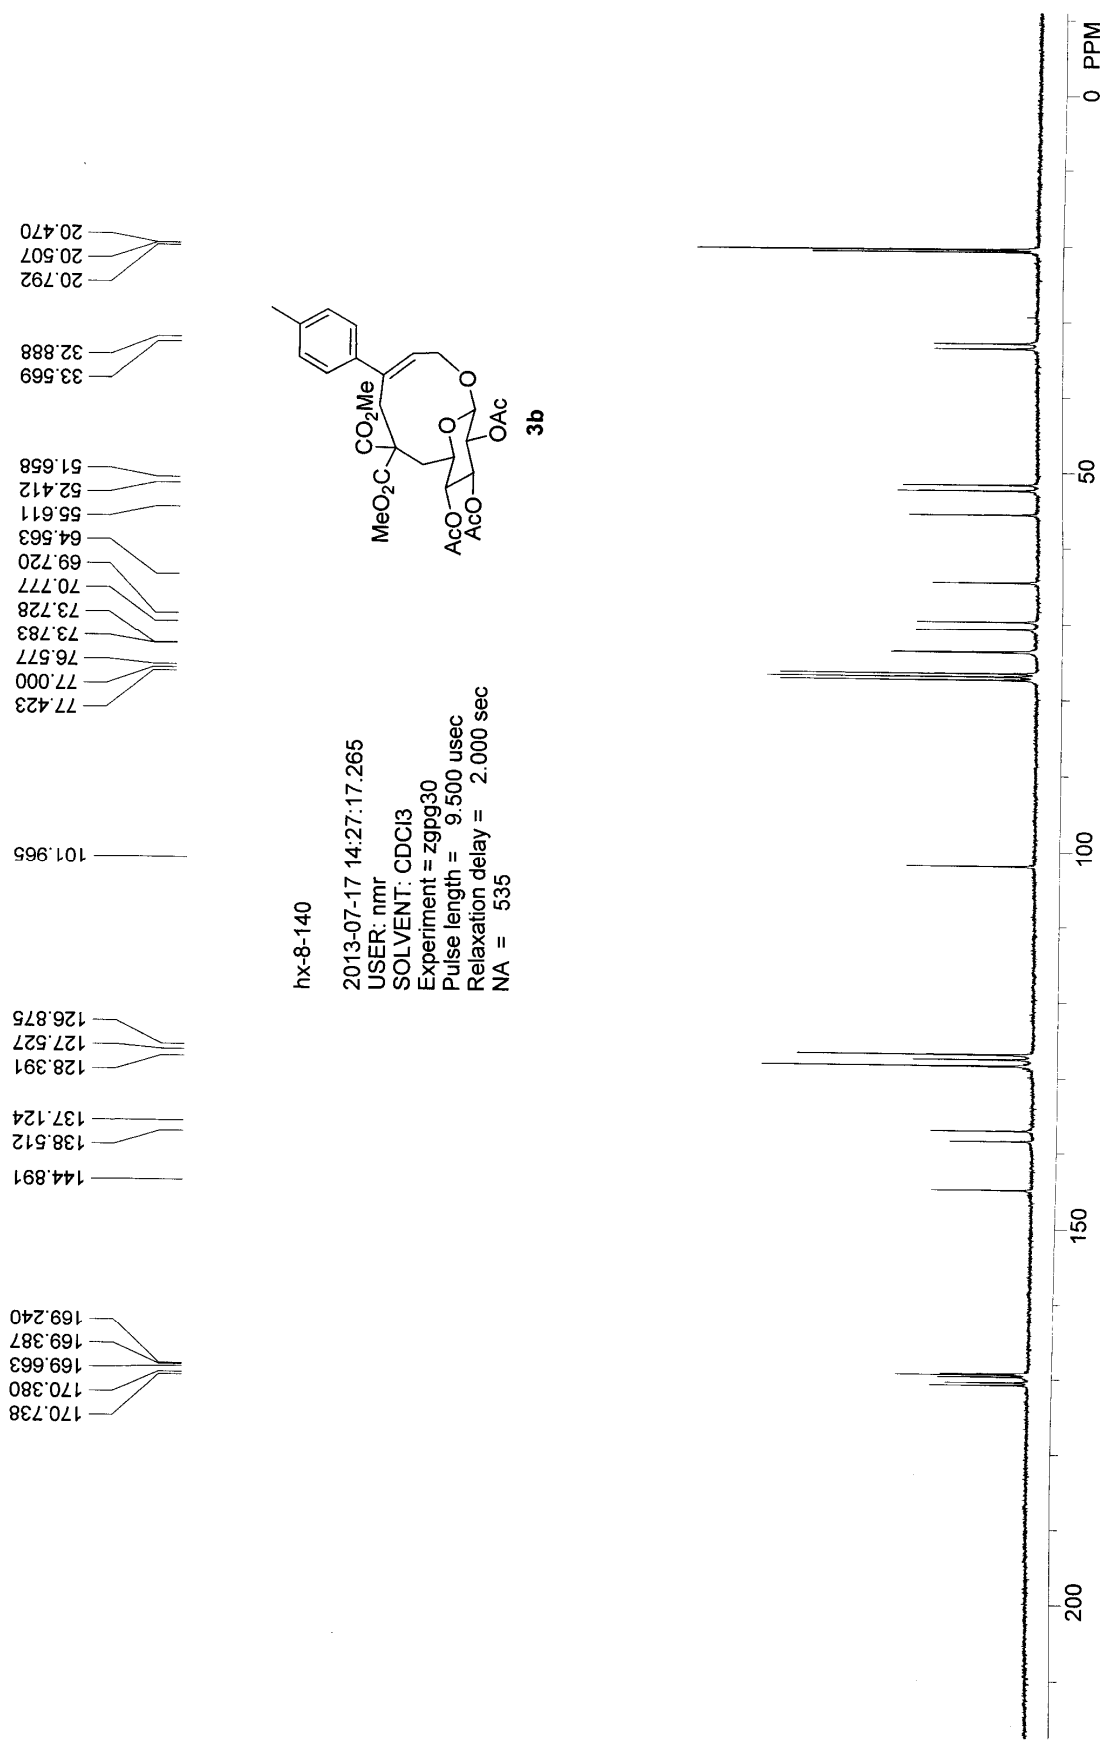

hx-8-140

2013-07-17 14:27:17.265

USER: nmr

SOLVENT: CDCl<sub>3</sub>

Experiment = zgpg30

Pulse length = 9.500 usec

Relaxation delay = 2.000 sec

NA = 535

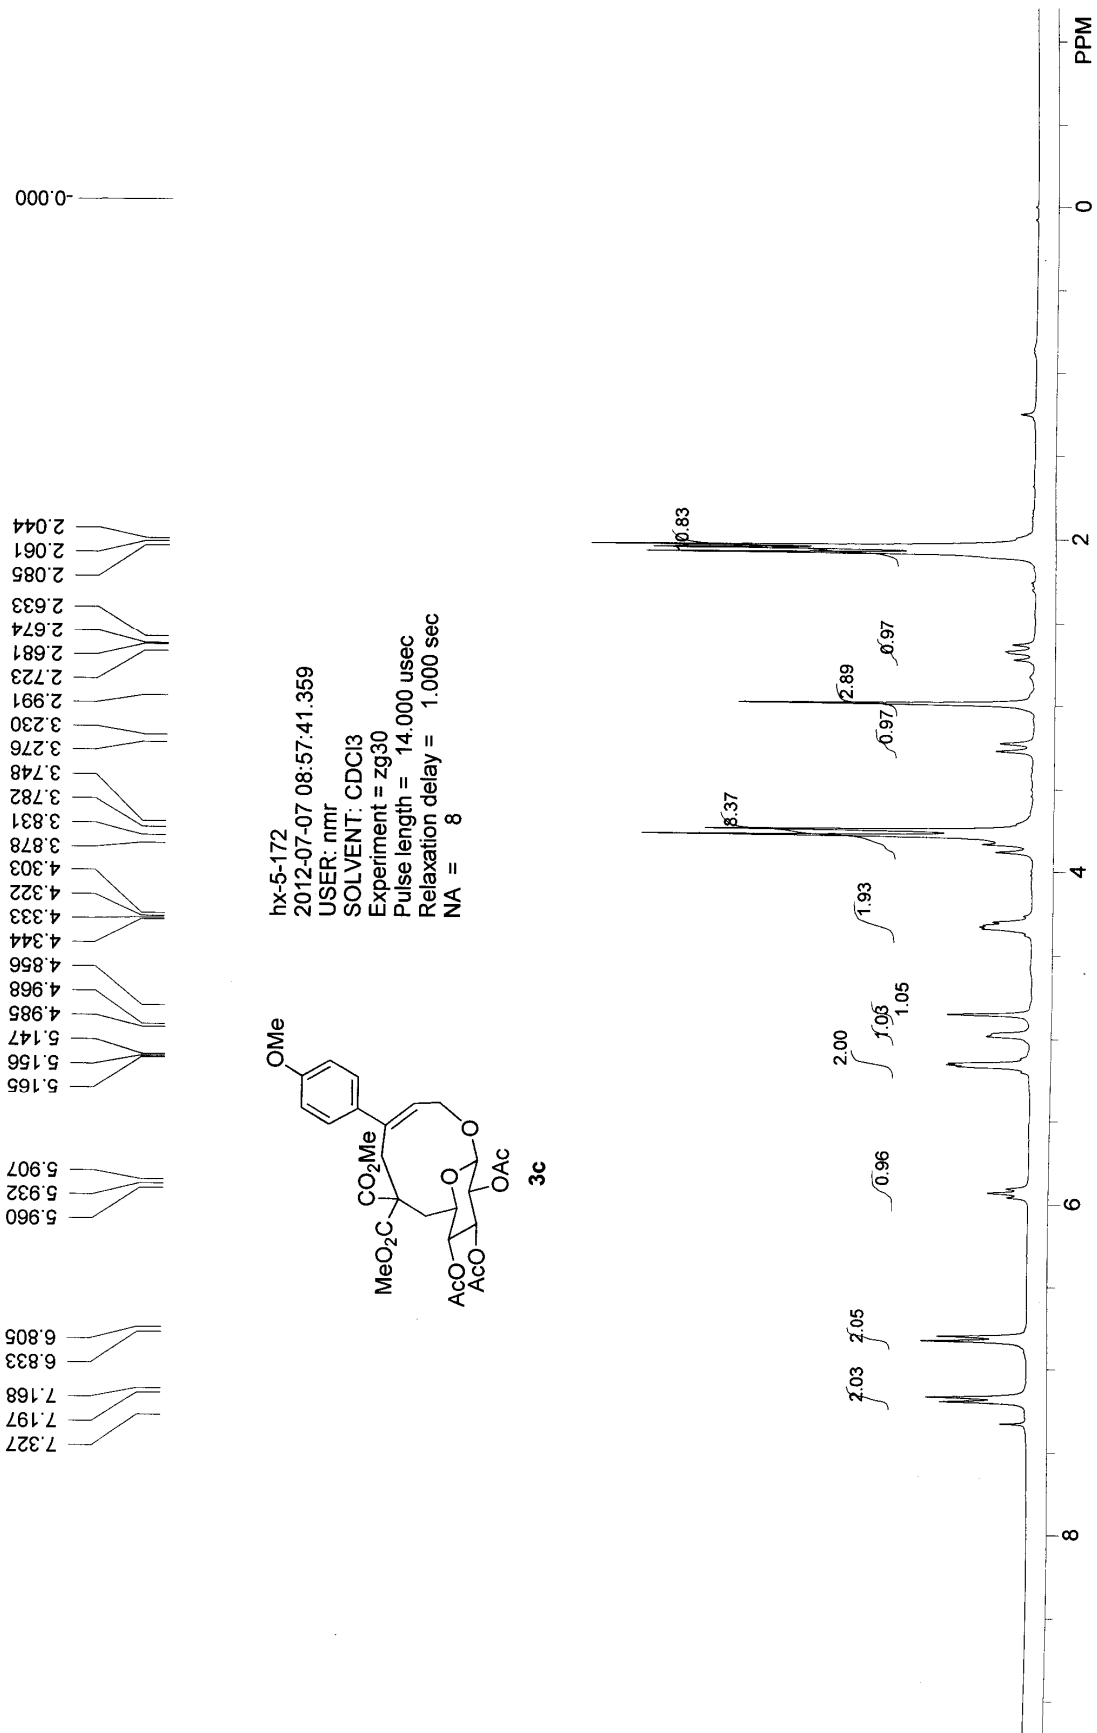



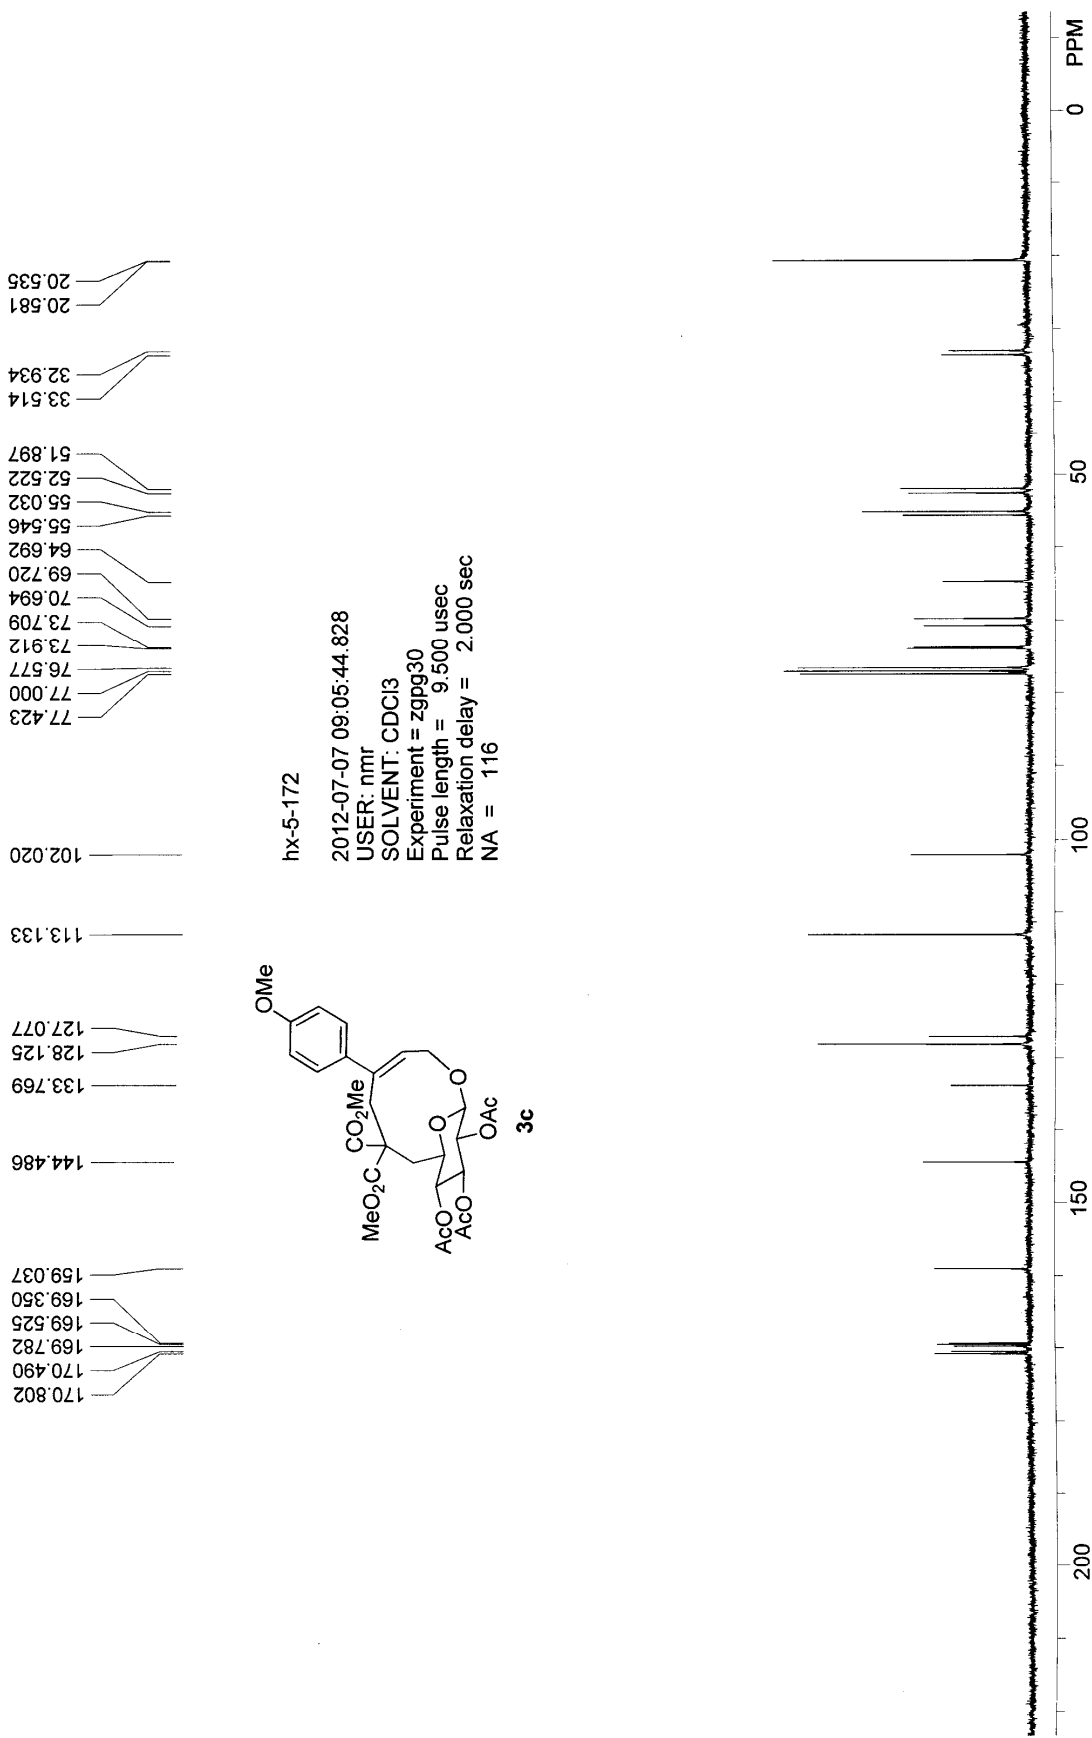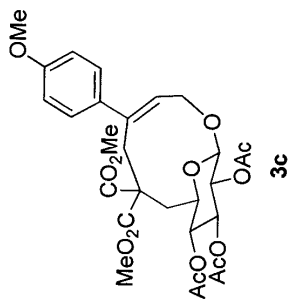

hx-5-172

2012-07-07 09:05:44.828

USER: nmr

SOLVENT: CDCl<sub>3</sub>

Experiment = zgpg30

Pulse length = 9.500 usec

Relaxation delay = 2.000 sec

NA = 116

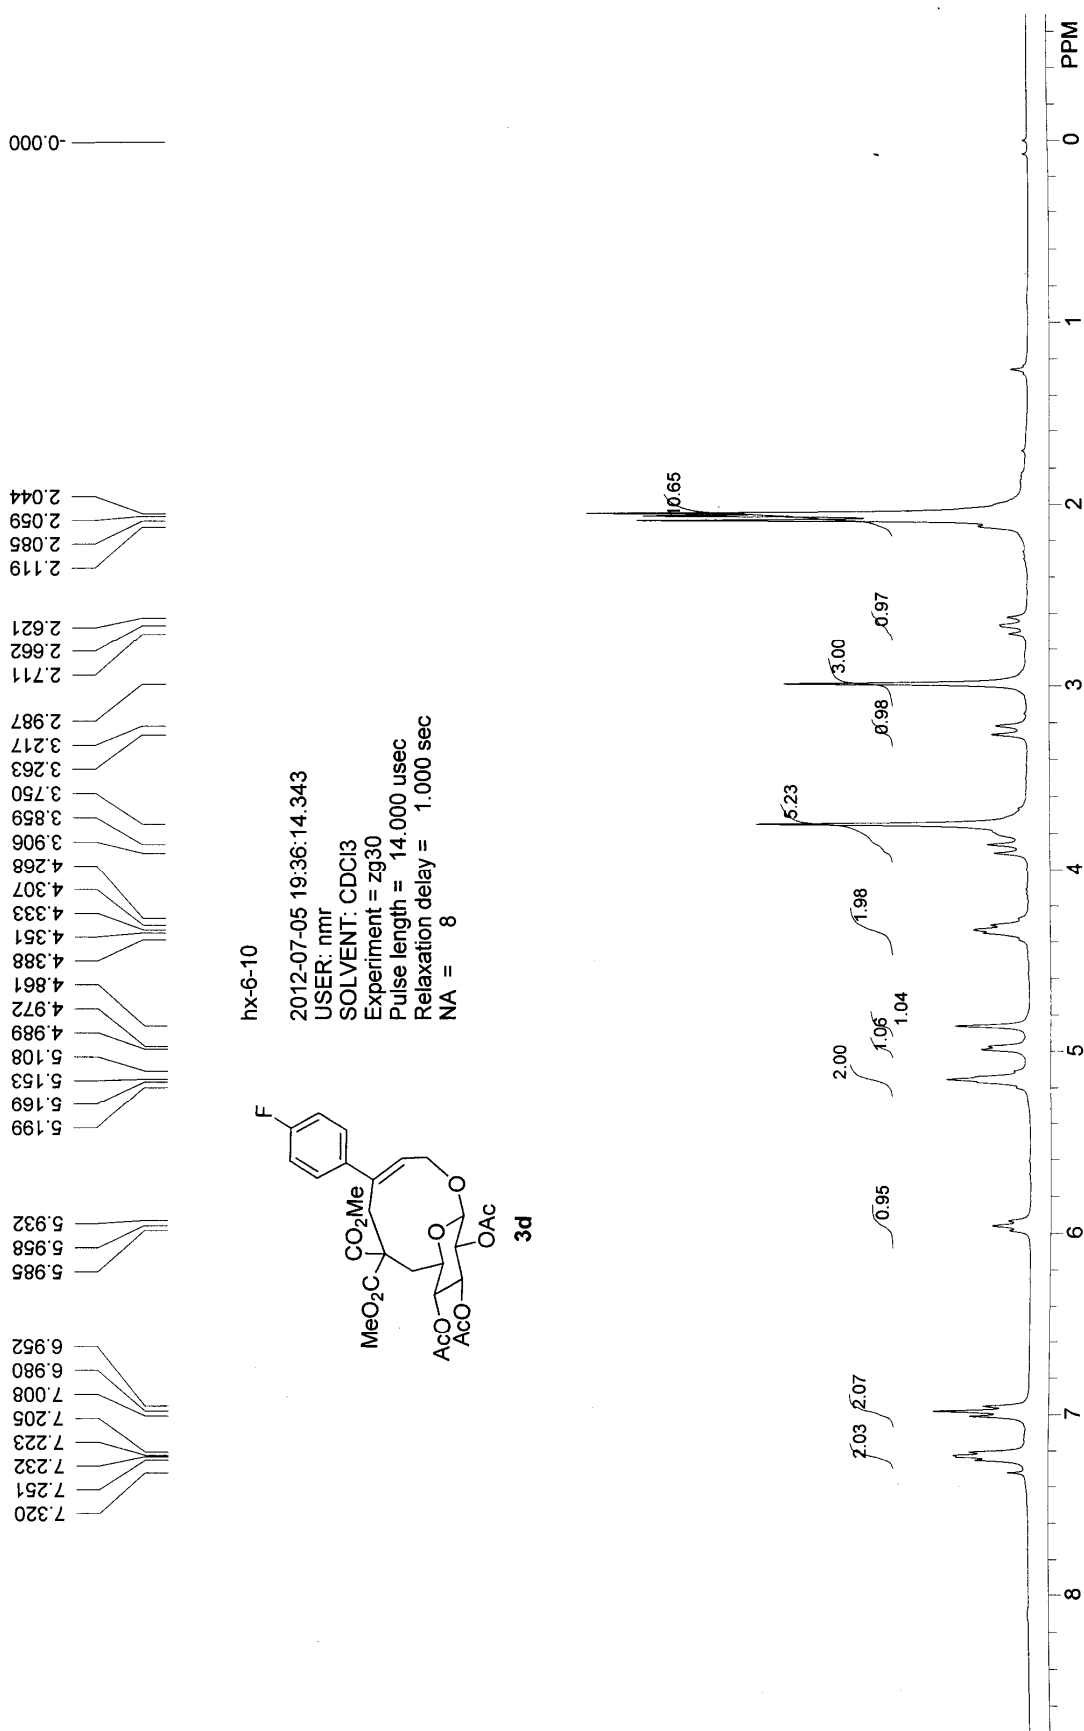

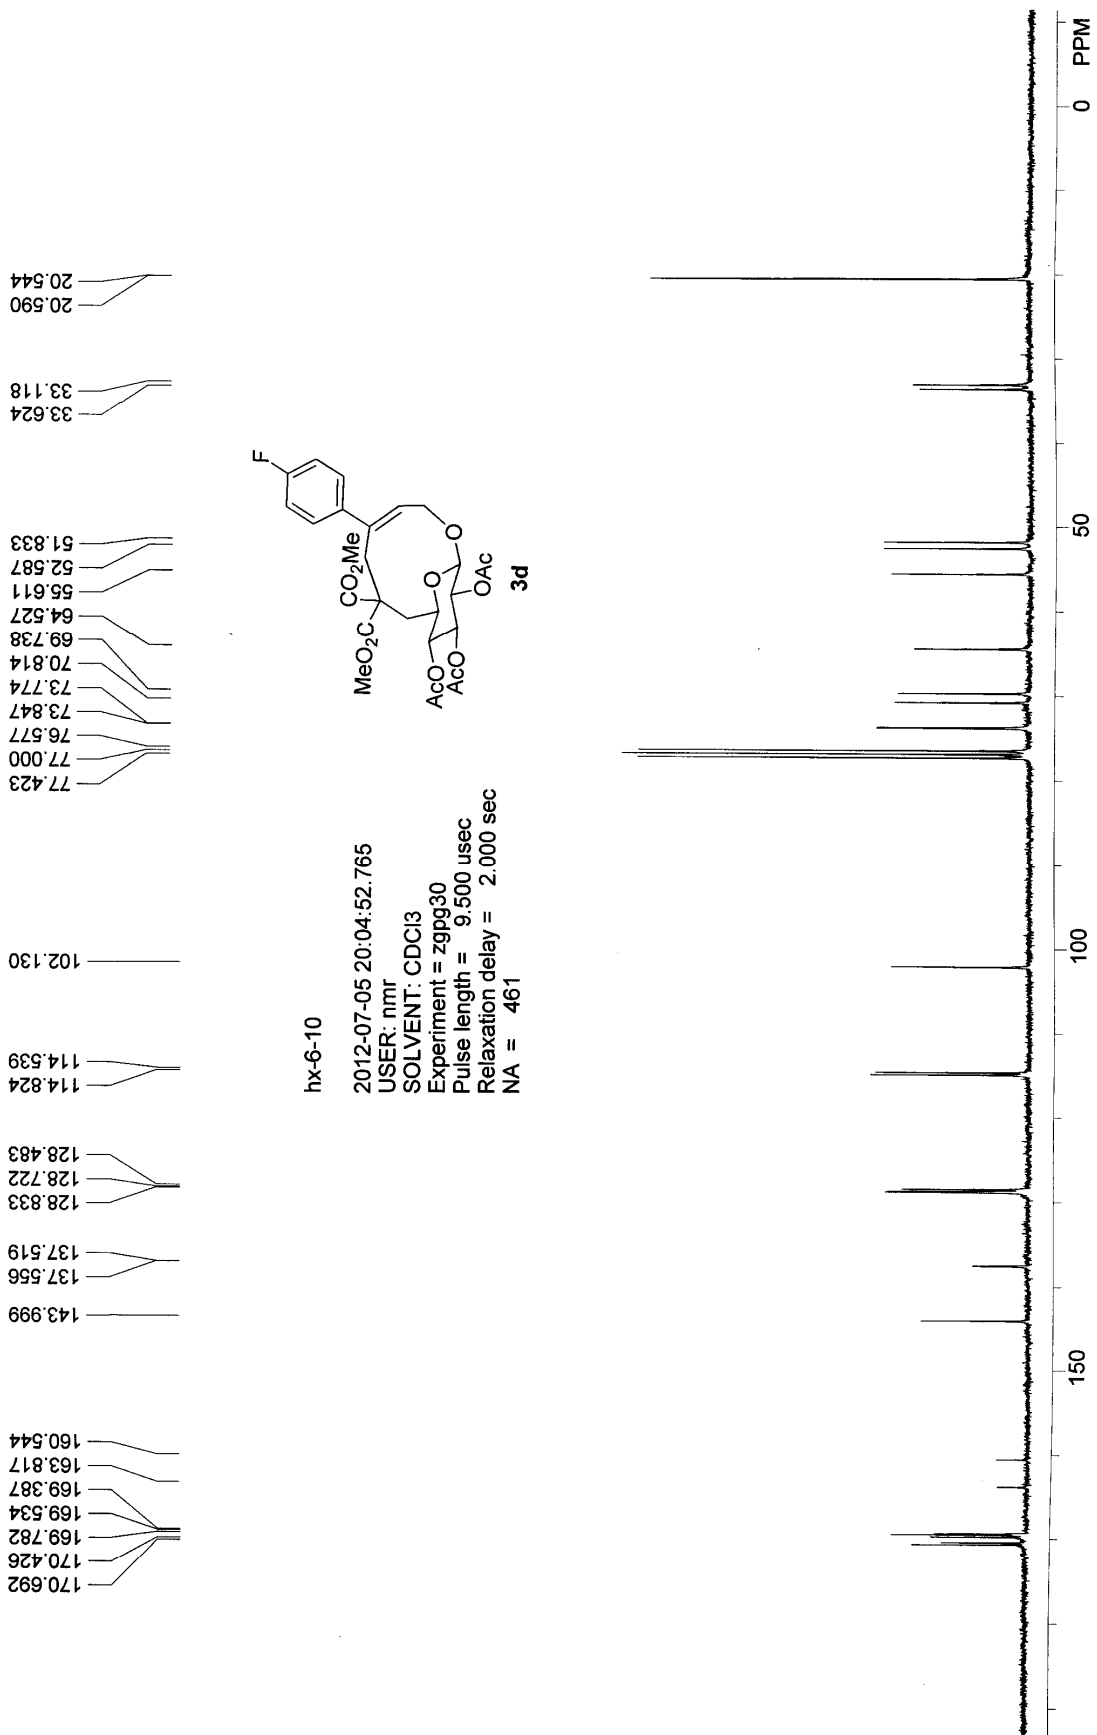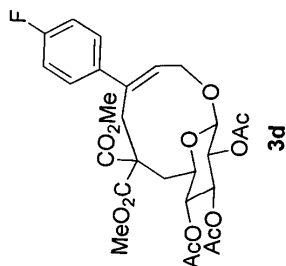

hx-6-10  
 2012-07-05 20:04:52.765  
 USER: nmf  
 SOLVENT: CDCl3  
 Experiment = zgpg30  
 Pulse length = 9.500 usec  
 Relaxation delay = 2.000 sec  
 NA = 461

0000

114.796

hx-6-10

2012-11-05 13:38:47.015

USER: nmr

SOLVENT: CDCl<sub>3</sub>

Experiment = zgfgn

Pulse length = 13.500 usec.

Relaxation delay = 1.000 sec

NA = 16

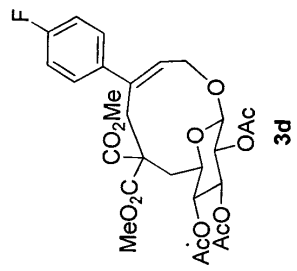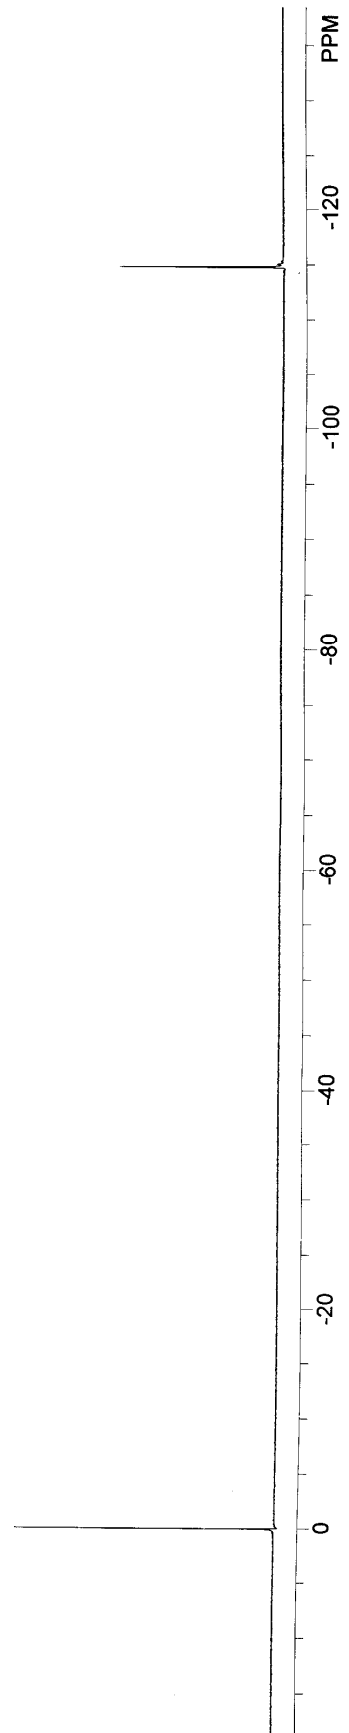

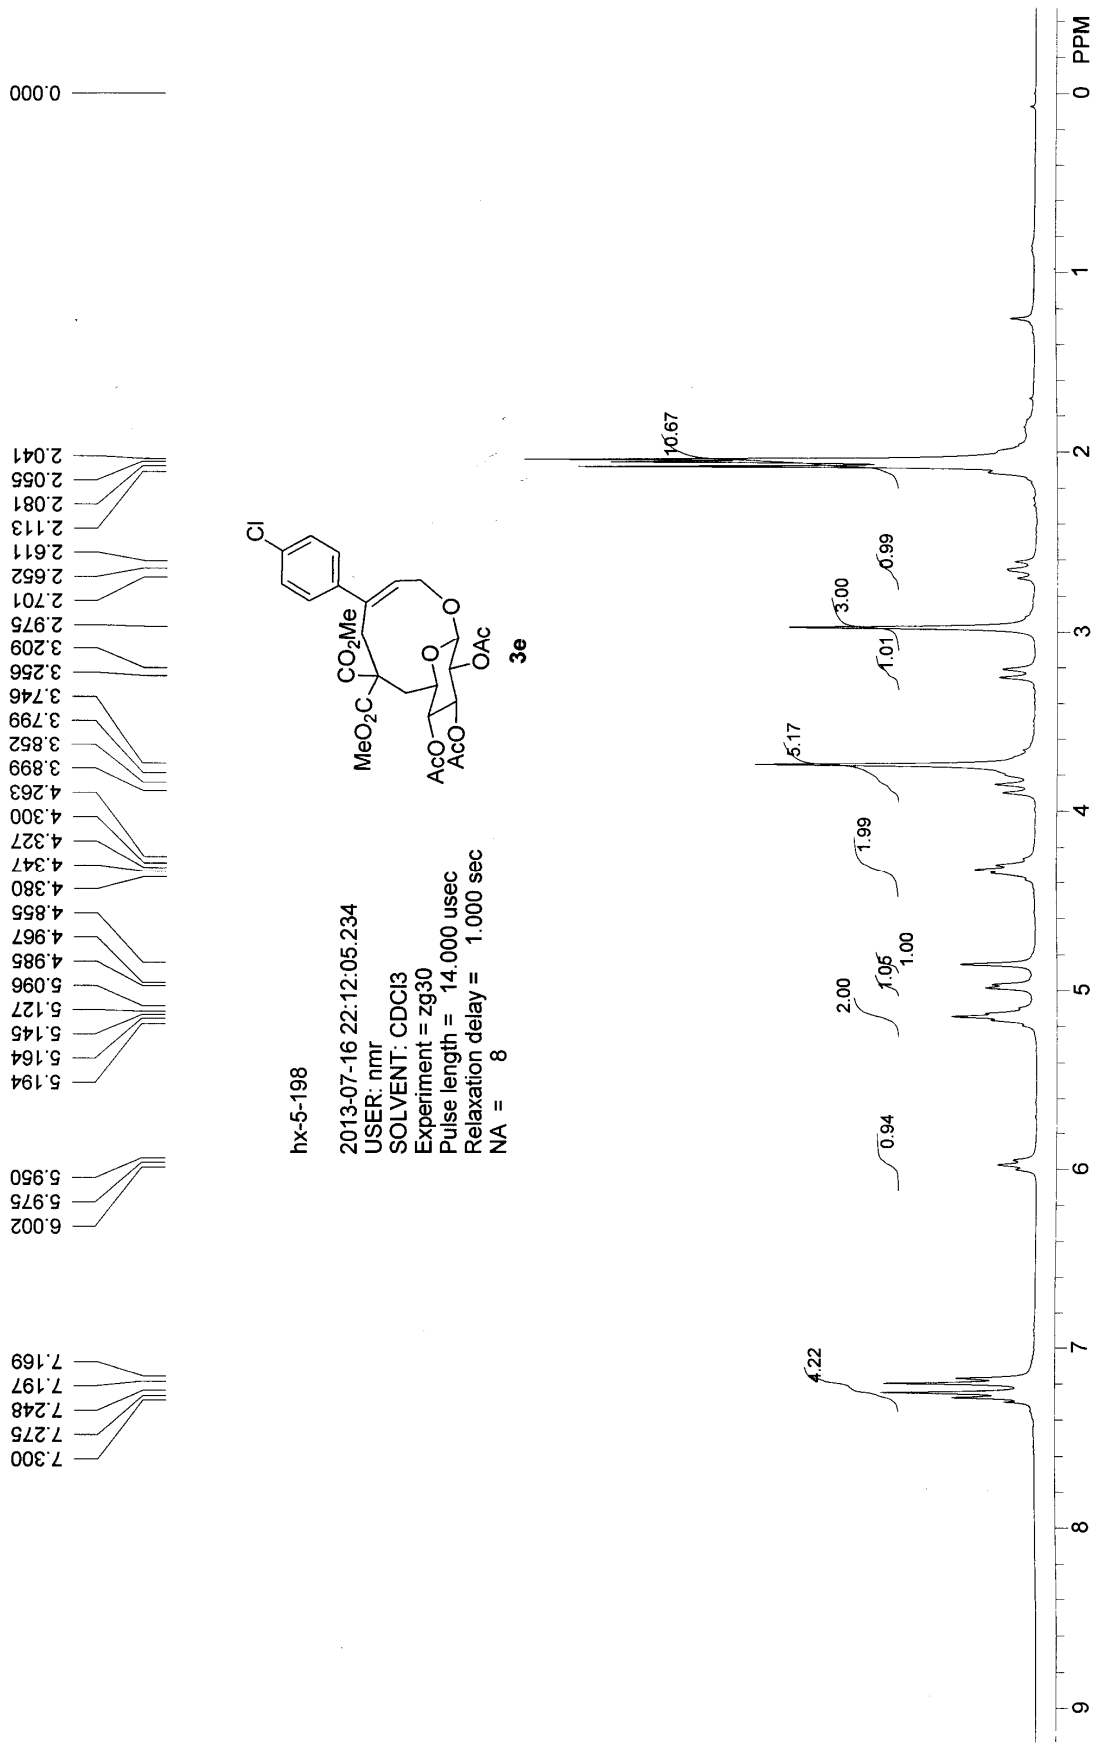

hx-5-198  
 2013-07-16 22:12:05.234  
 USER: nmr  
 SOLVENT: CDCl3  
 Experiment = zg30  
 Pulse length = 14.000 usec  
 Relaxation delay = 1.000 sec  
 NA = 8

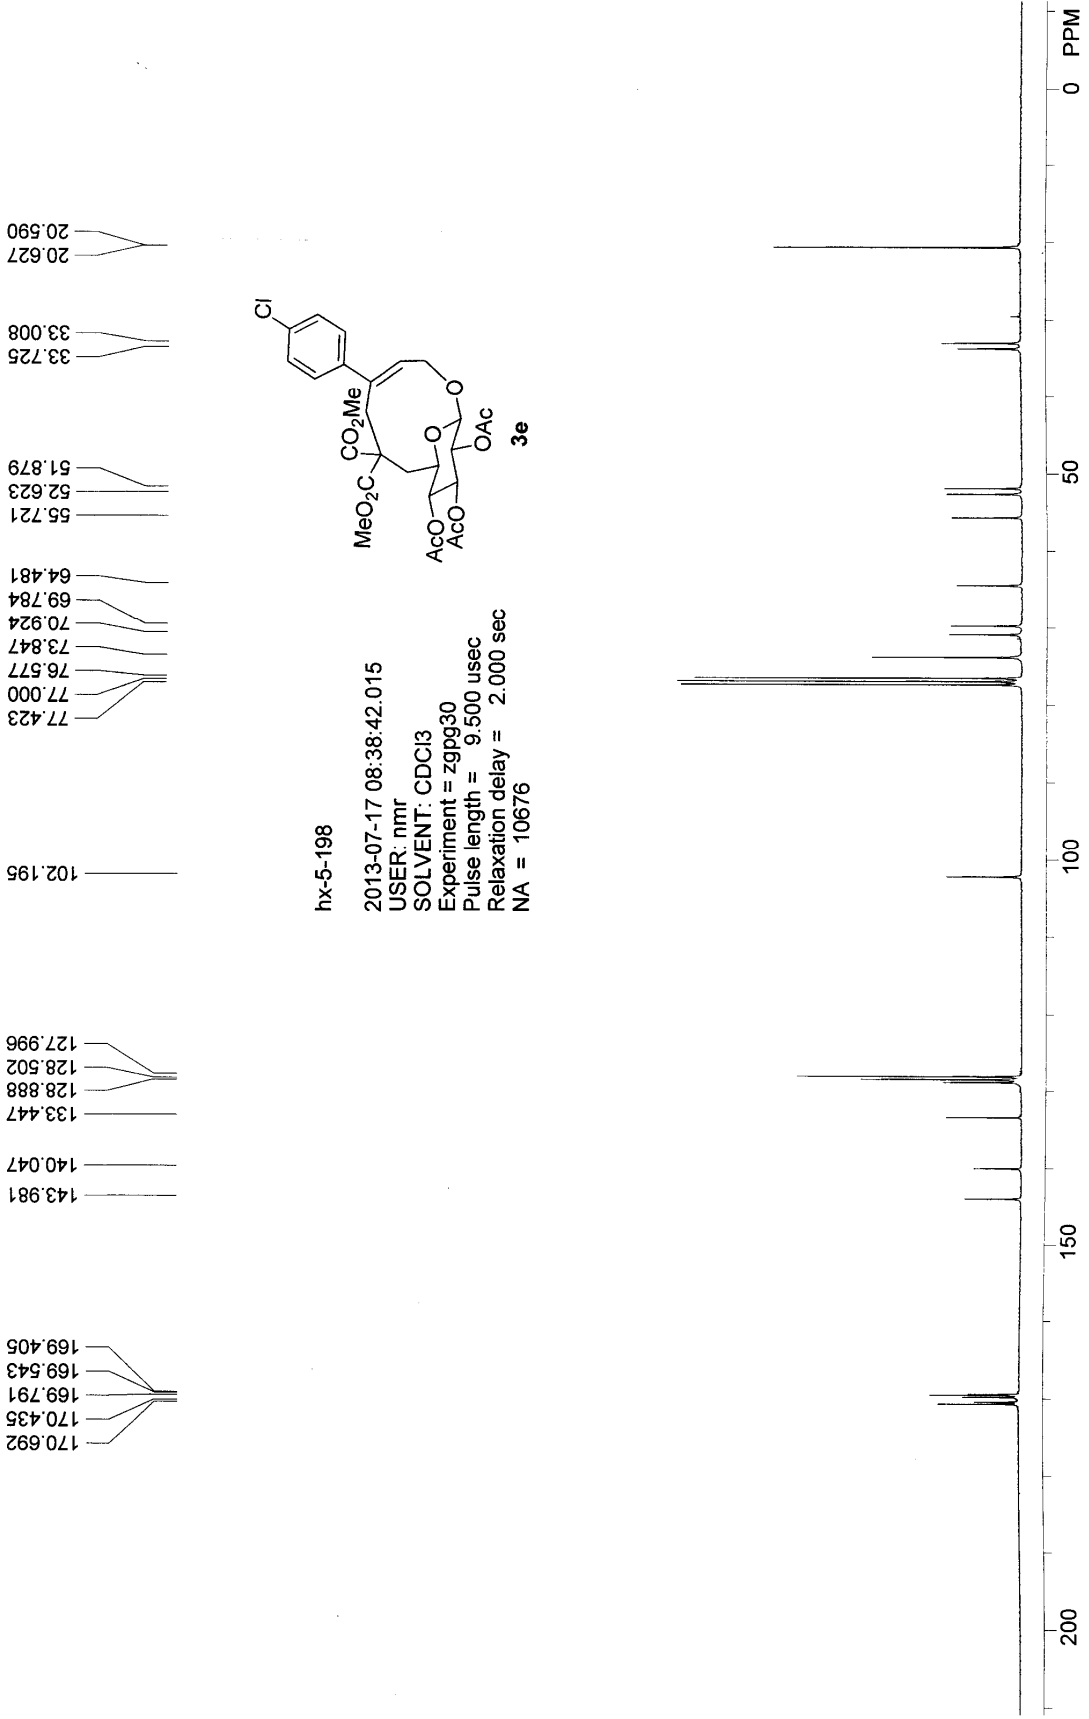

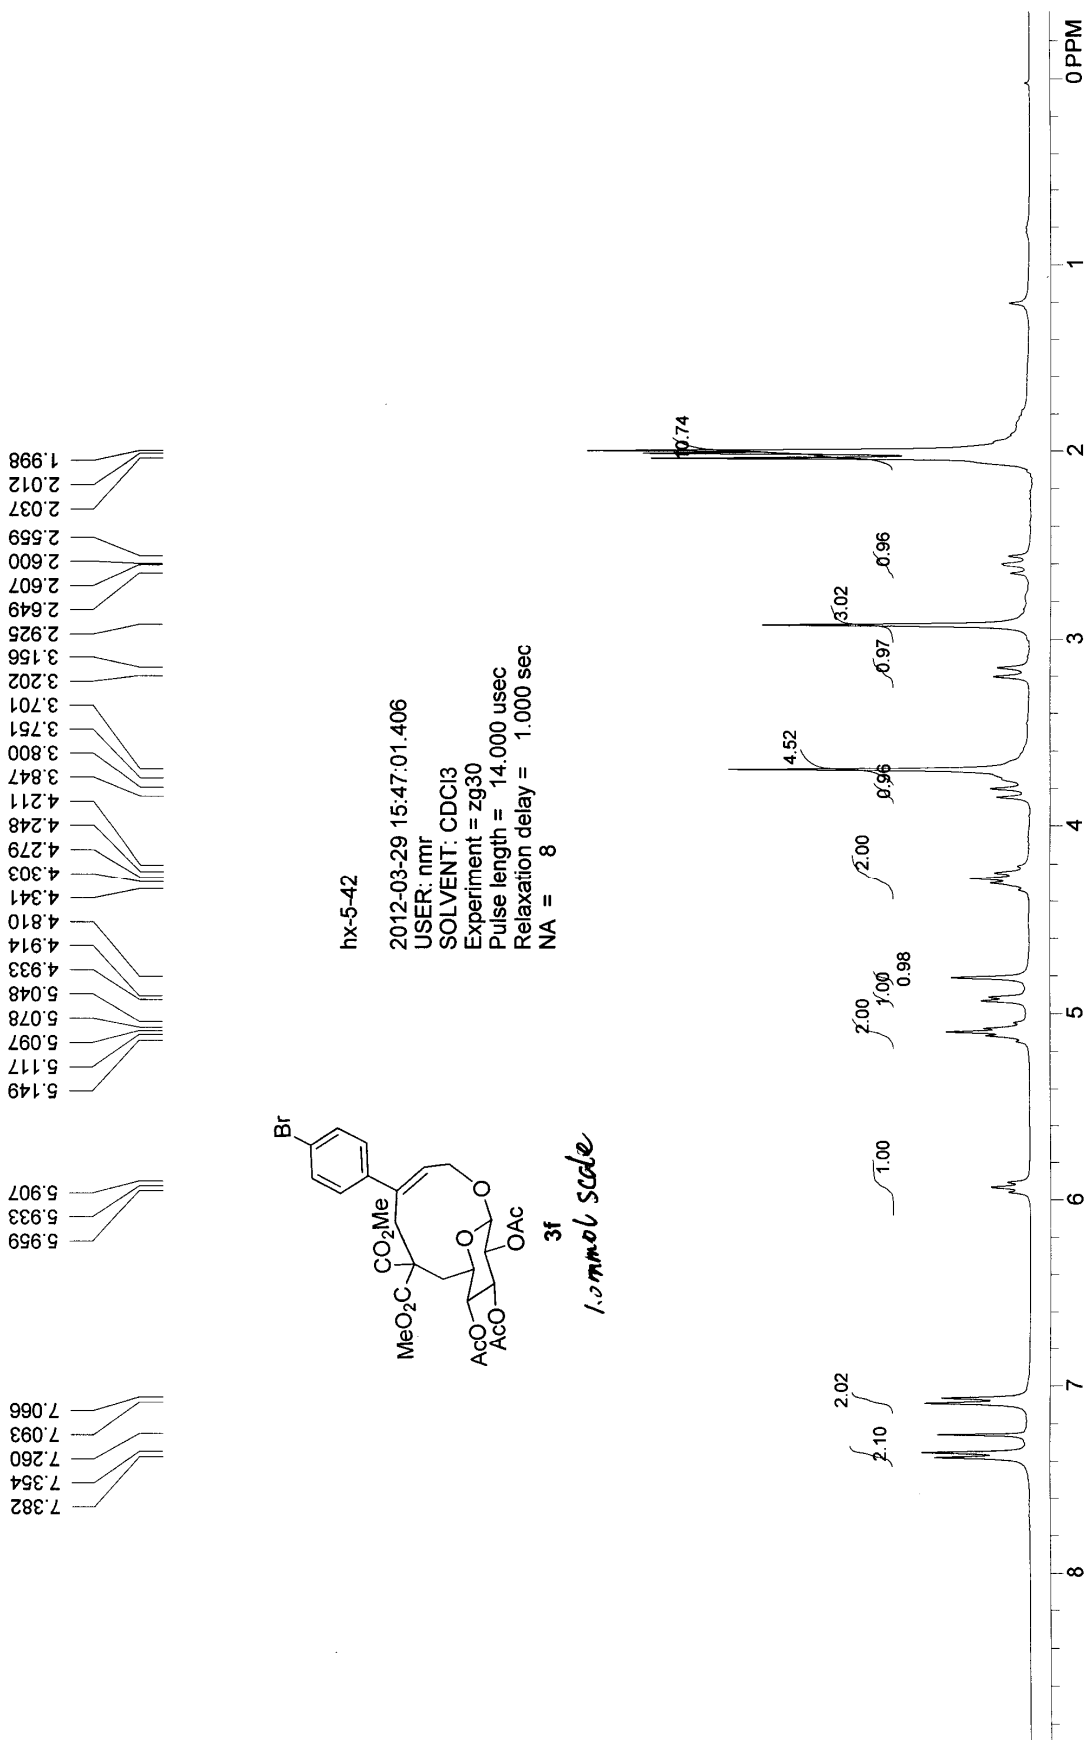

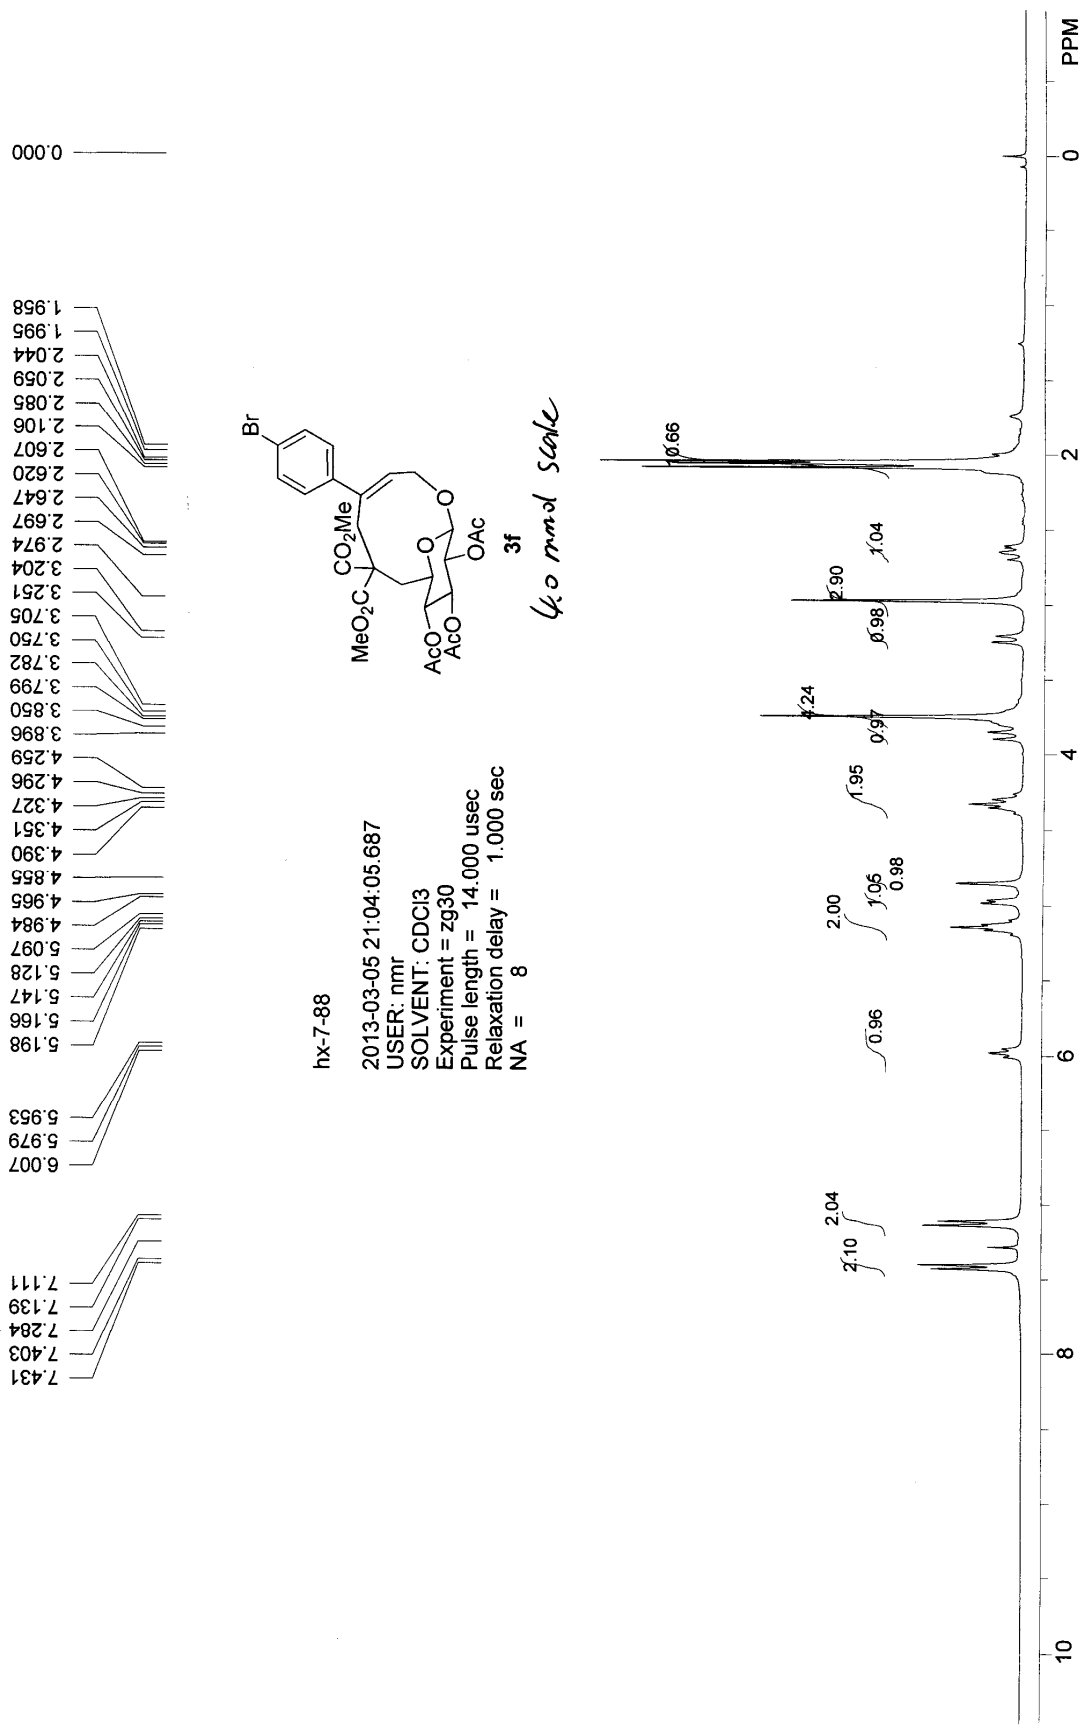



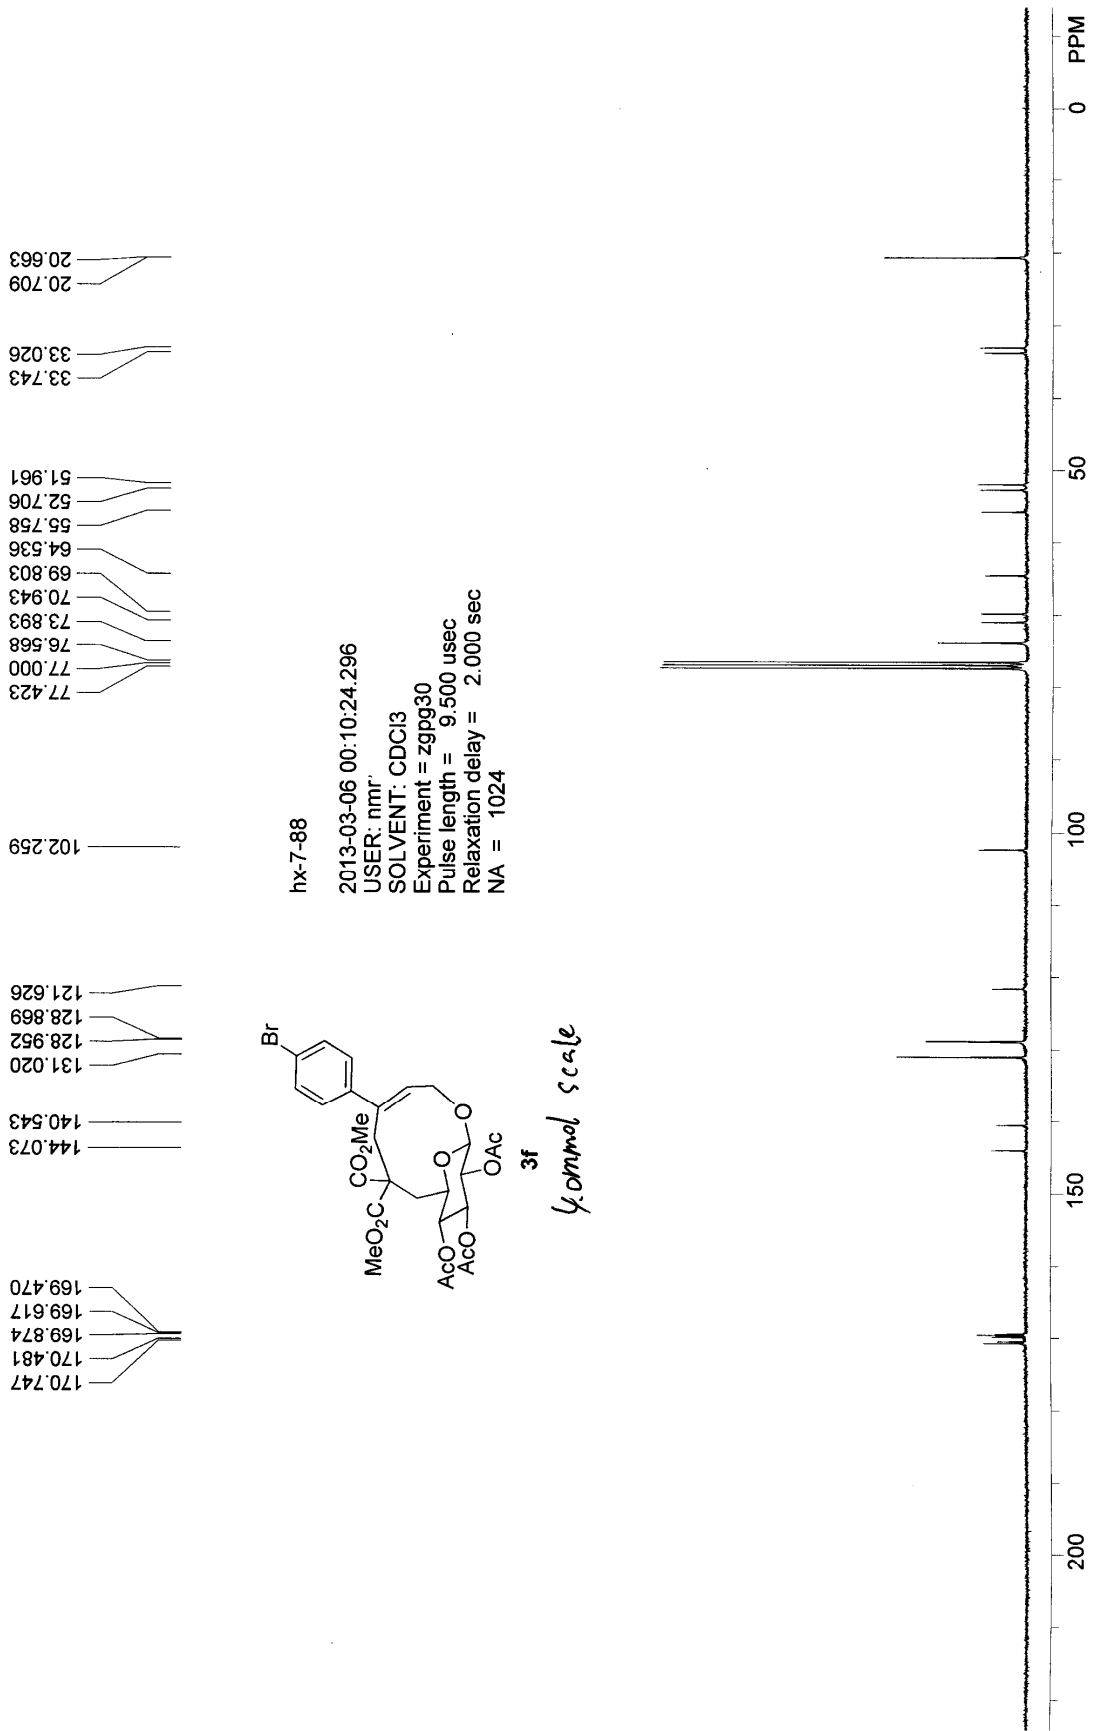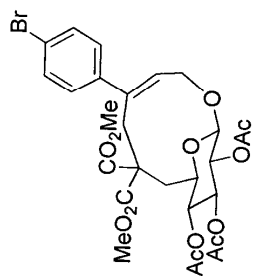

*4.0mmol scale*

hx-7-88

2013-03-06 00:10:24.296

USER: nmr

SOLVENT: CDCl3

Experiment = zgpg30

Pulse length = 9.500 usec

Relaxation delay = 2.000 sec

NA = 1024

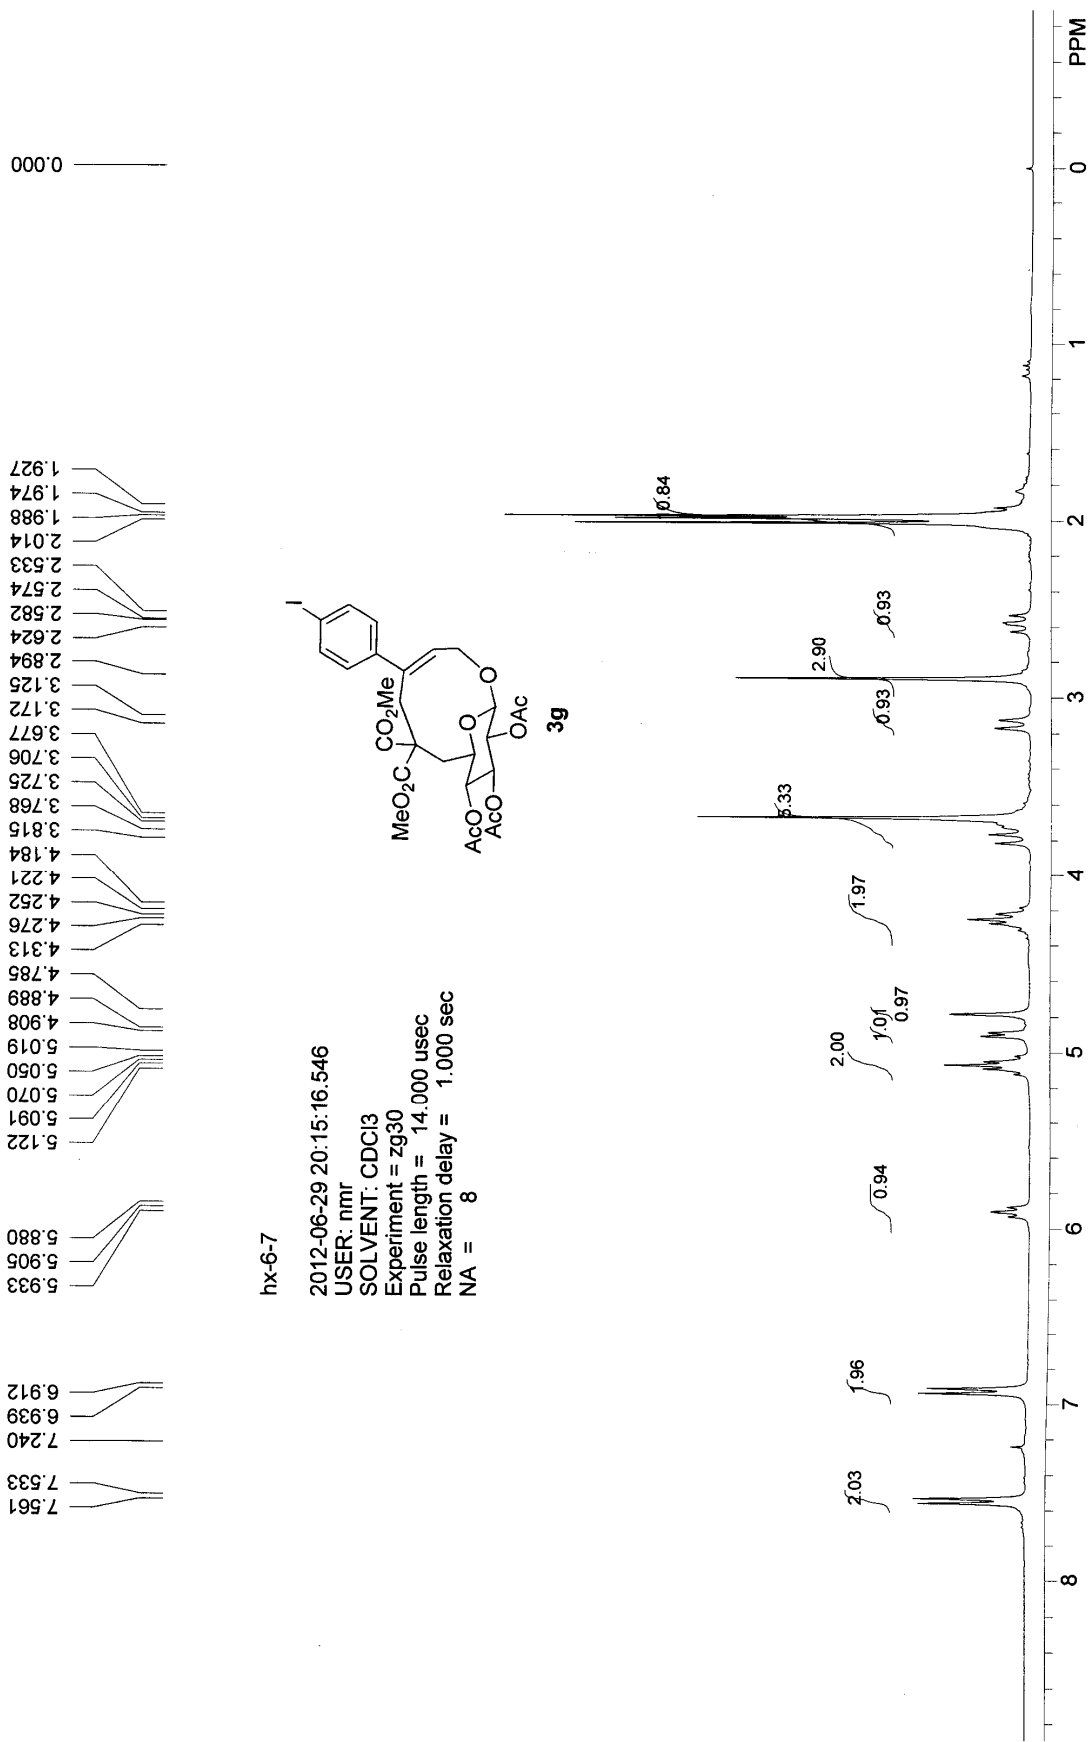

hx-6-7

2012-06-29 20:15:16.546  
 USER: nmr  
 SOLVENT: CDCl3  
 Experiment = zg30  
 Pulse length = 14.000 usec  
 Relaxation delay = 1.000 sec  
 NA = 8

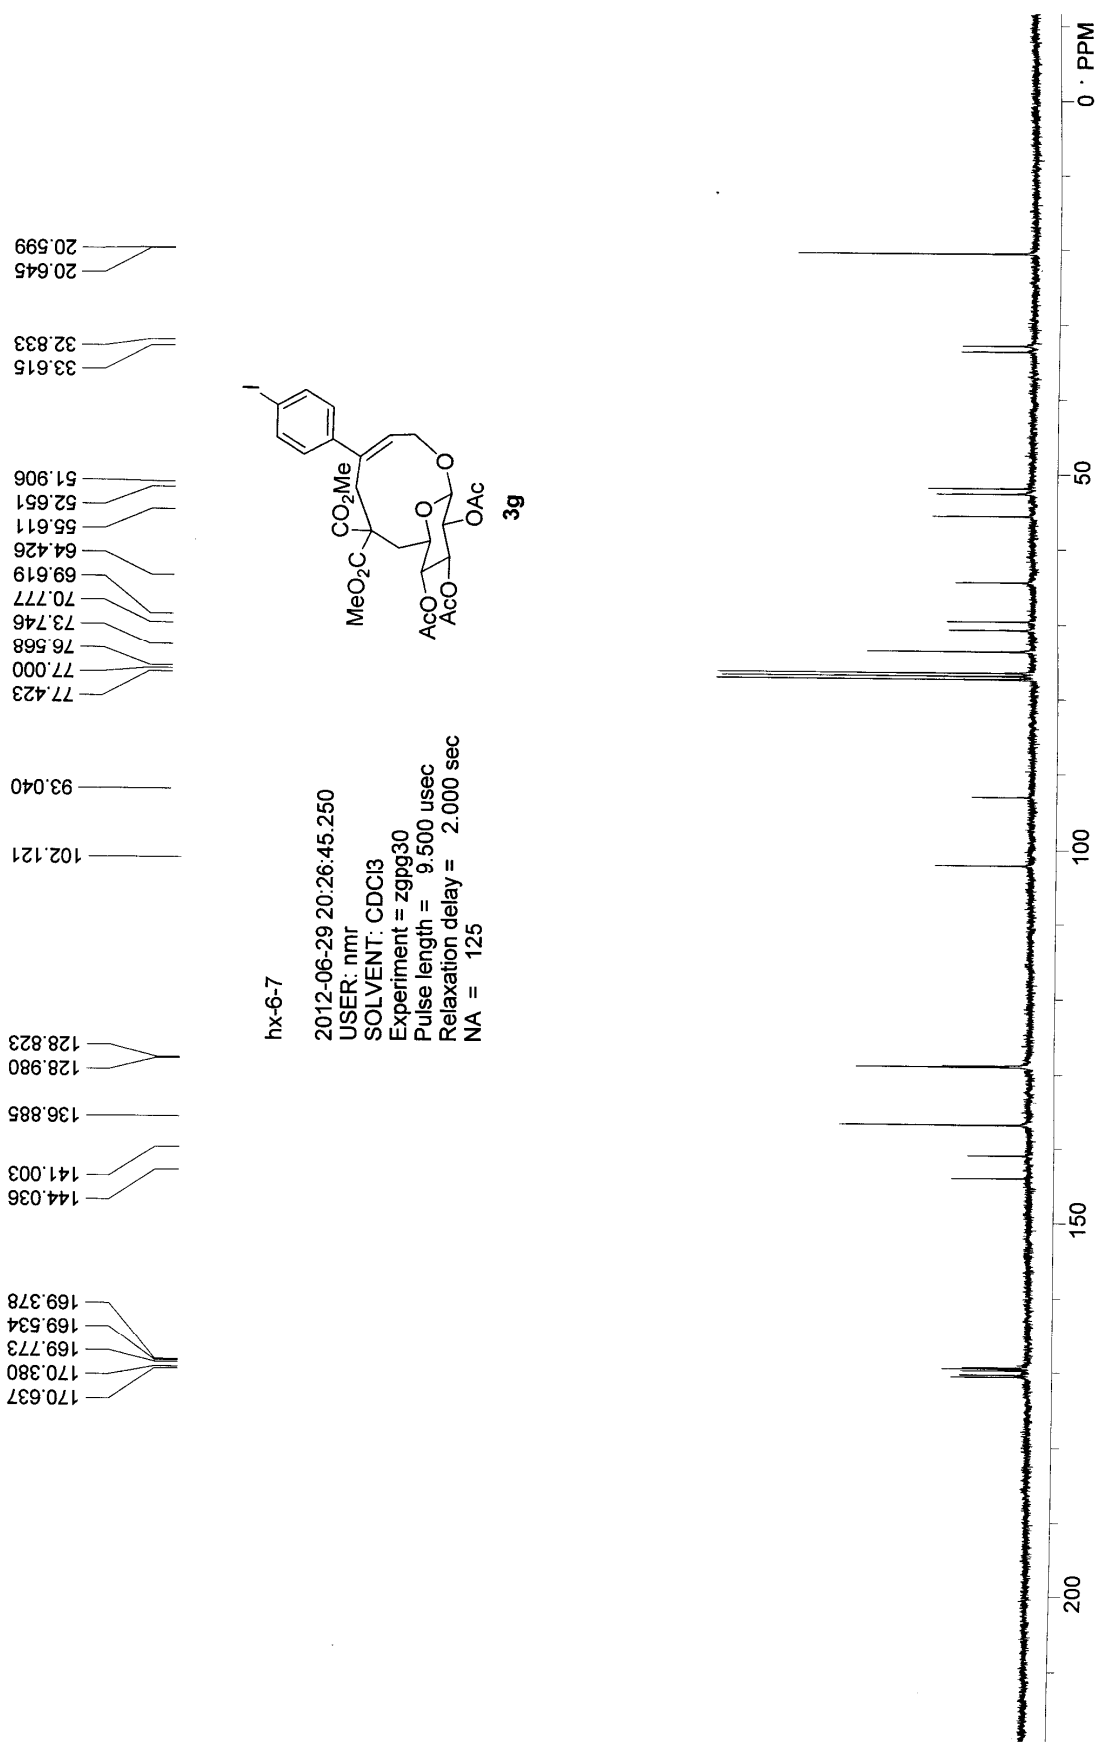

hx-6-7  
 2012-06-29 20:26:45.250  
 USER: nmr  
 SOLVENT: CDCl3  
 Experiment = zgpg30  
 Pulse length = 9.500 usec  
 Relaxation delay = 2.000 sec  
 NA = 125

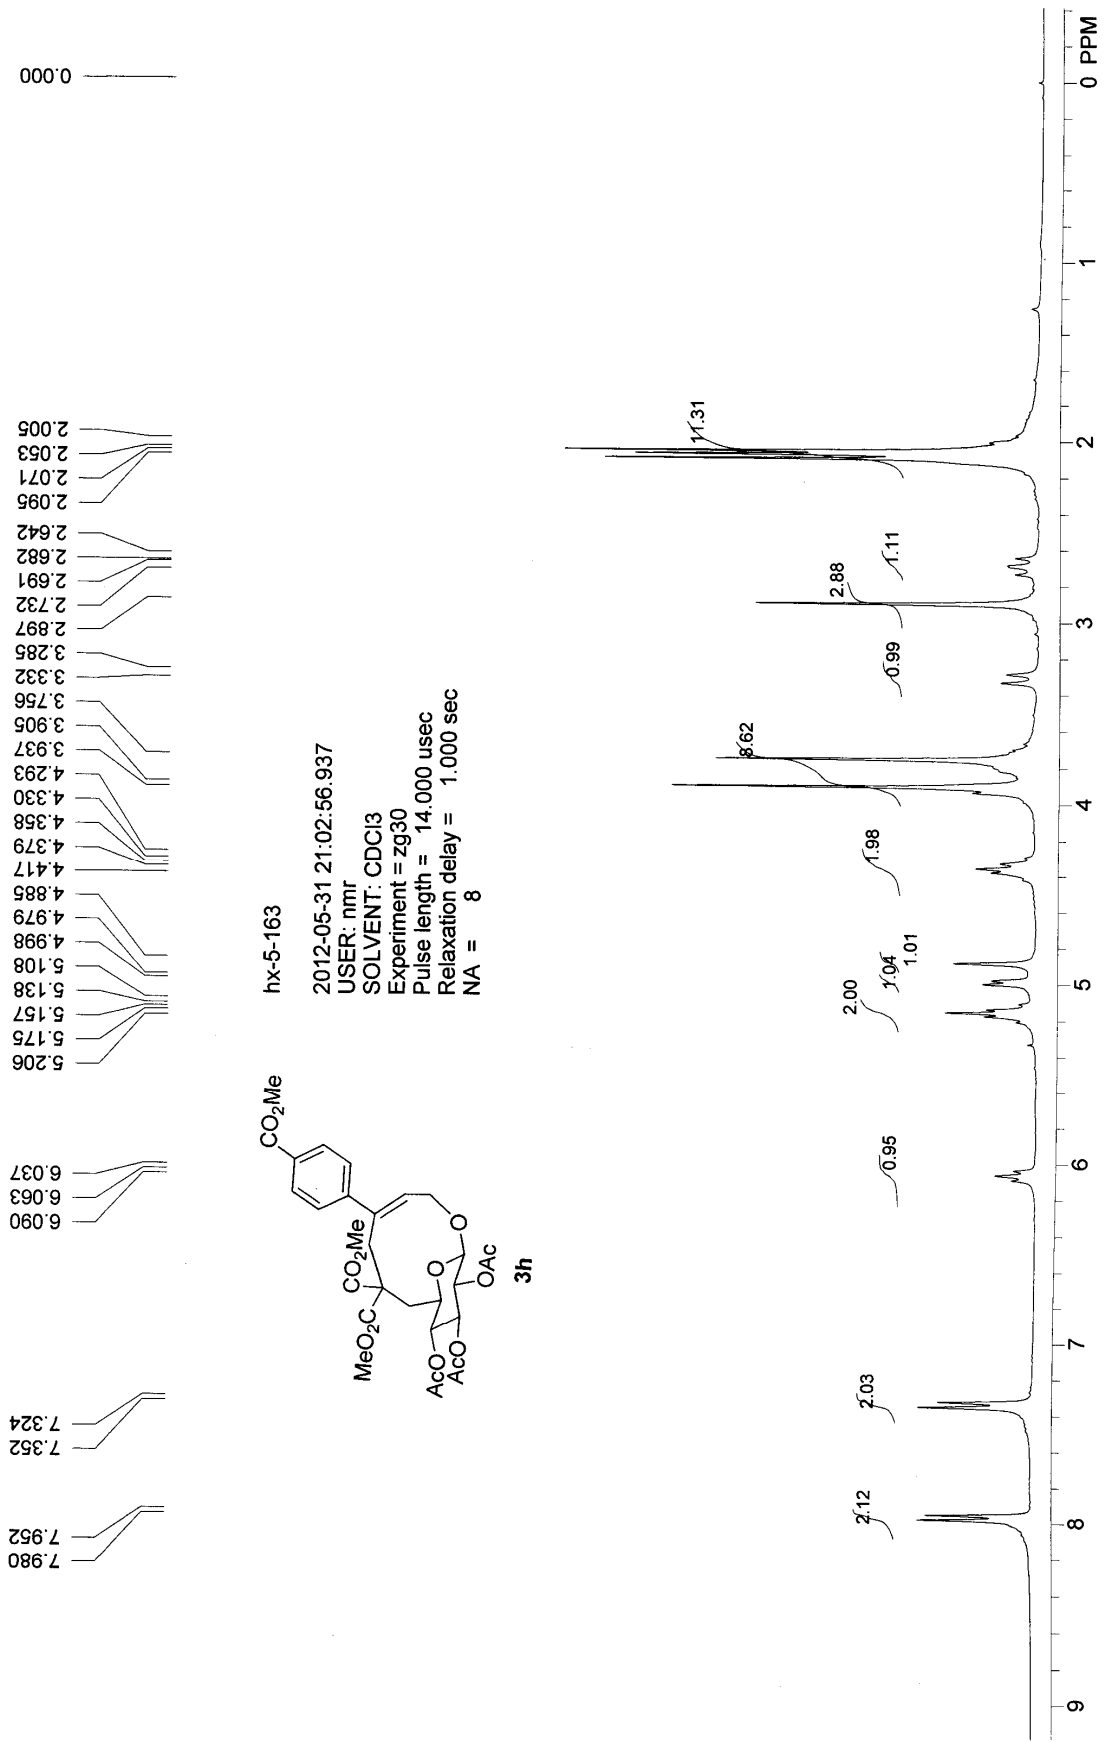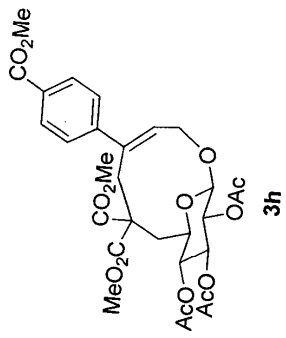

hx-5-163

2012-05-31 21:02:56.937

USER: nmr  
 SOLVENT: CDCl<sub>3</sub>  
 Experiment = zg30  
 Pulse length = 14.000 usec  
 Relaxation delay = 1.000 sec  
 NA = 8

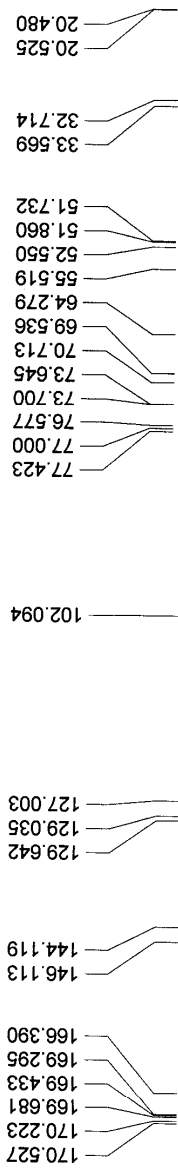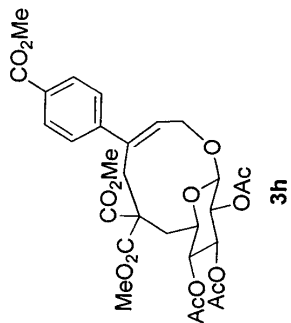

hx-5-163  
2012-05-31 21:12:49.156  
USER: nmr  
SOLVENT: CDCl<sub>3</sub>  
Experiment = zgpg30  
Pulse length = 9.500 usec  
Relaxation delay = 2.000 sec  
NA = 148

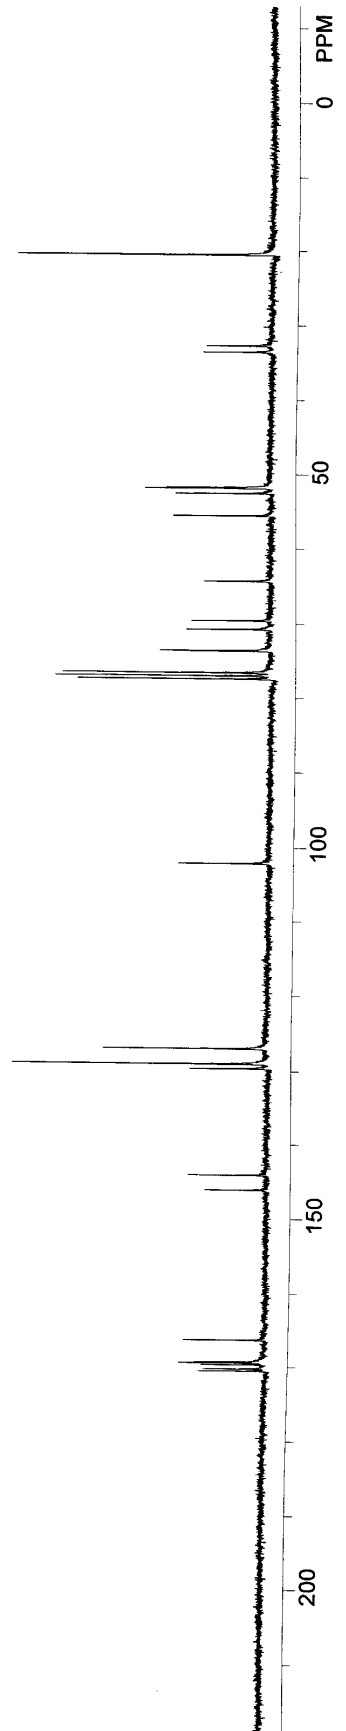

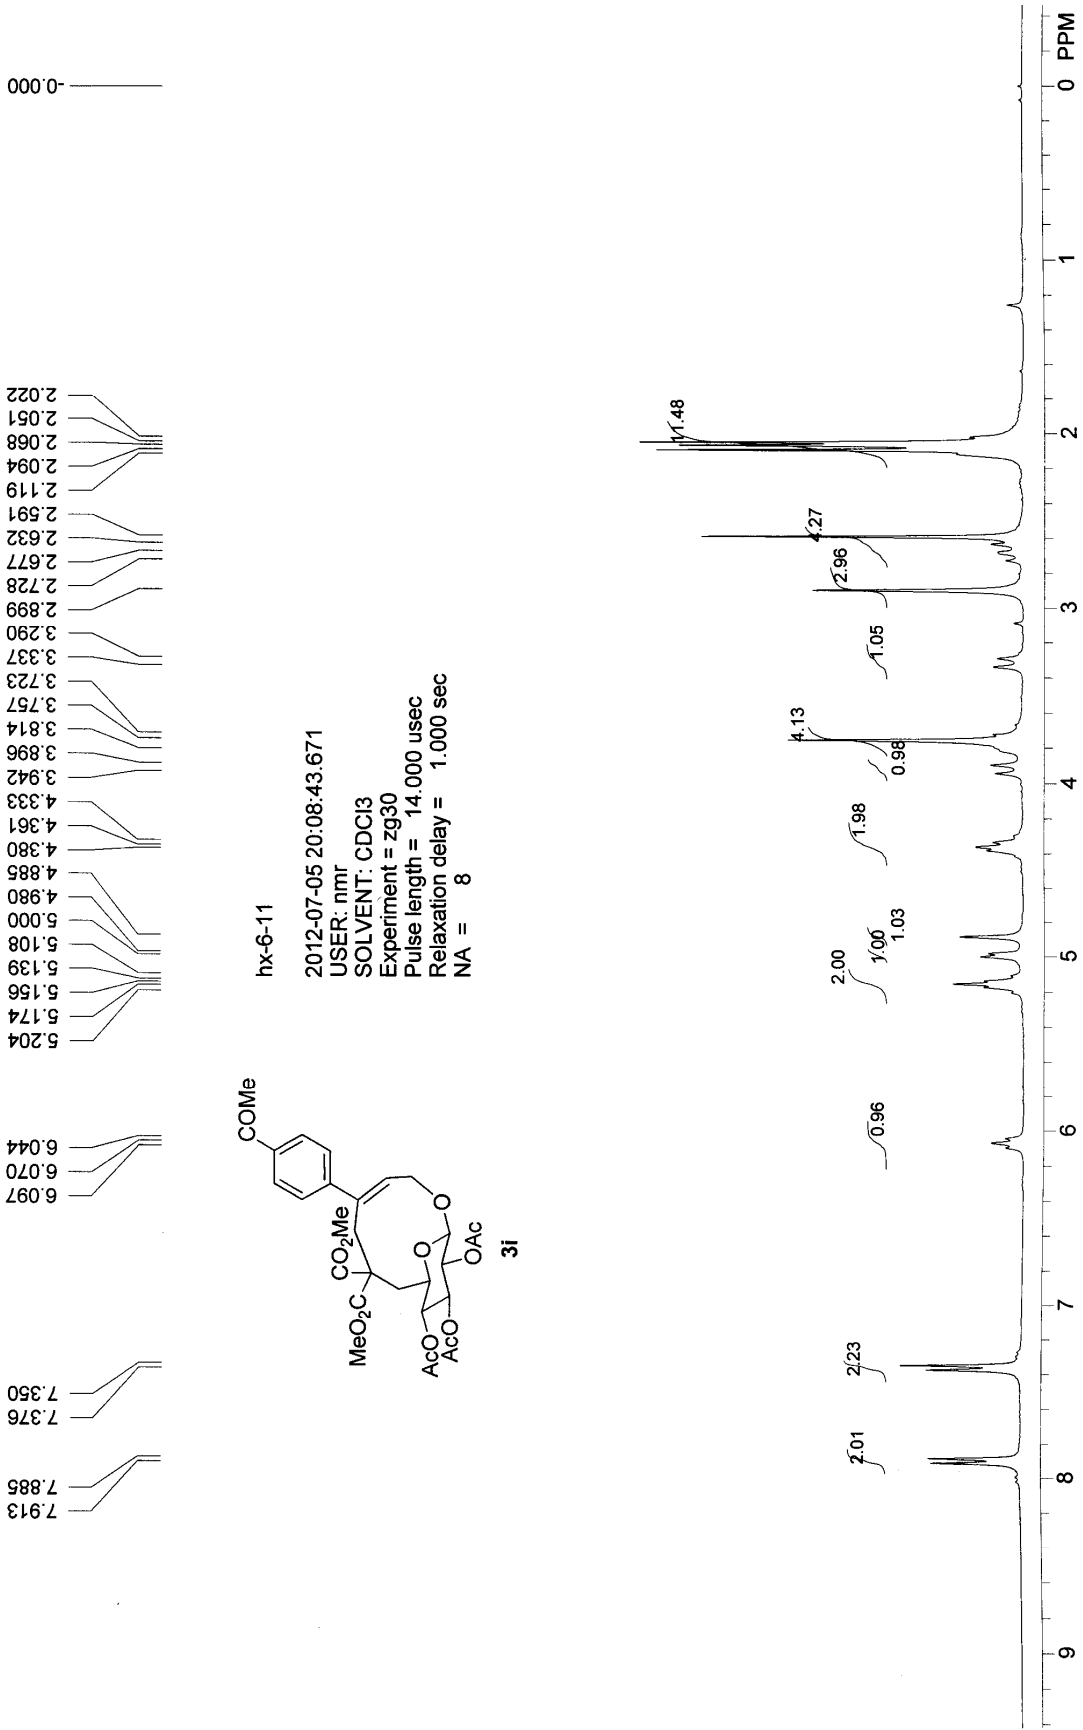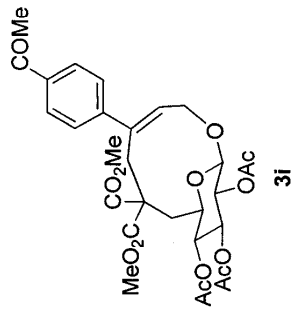

hx-6-11

2012-07-05 20:08:43.671

USER: nmr

SOLVENT: CDCl3

Experiment = zg30

Pulse length = 14.000 usec

Relaxation delay = 1.000 sec

NA = 8

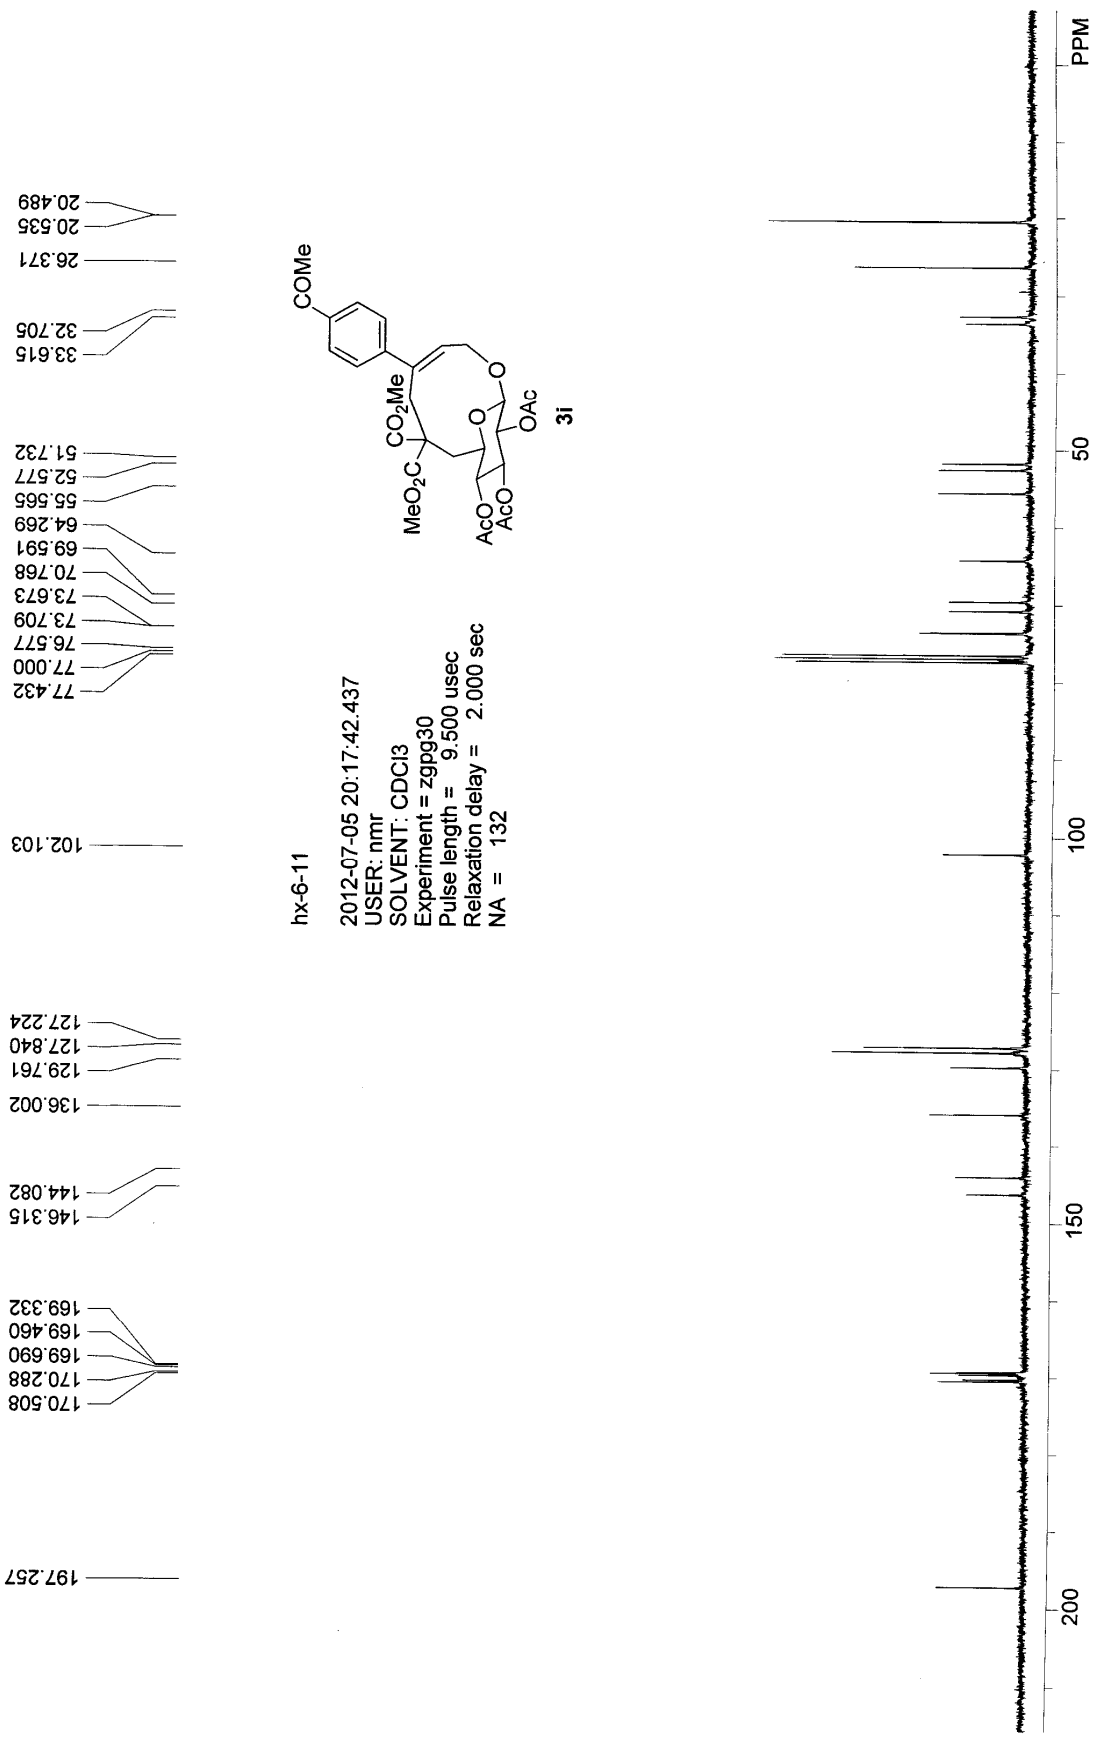

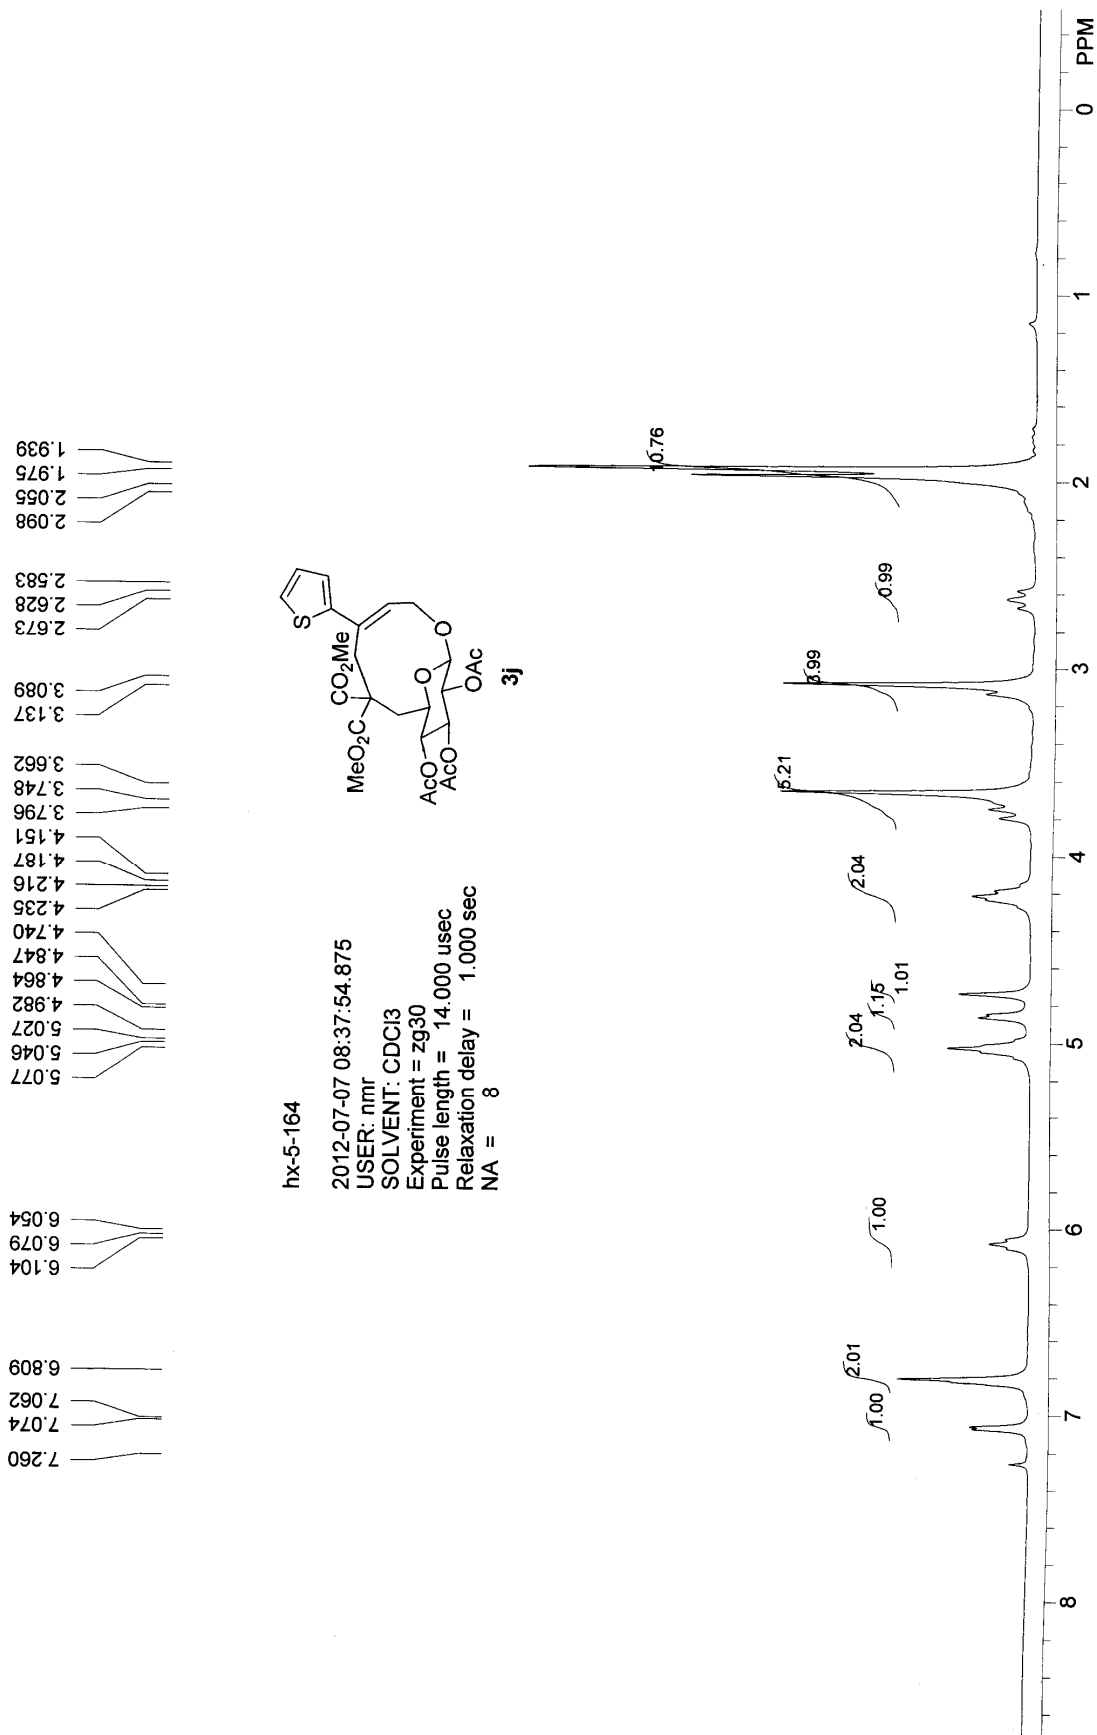



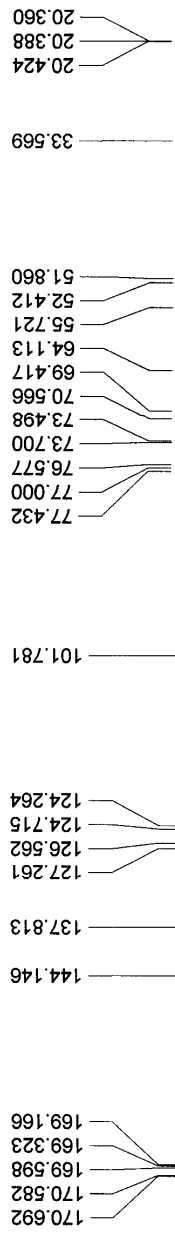

hx-5-164

2012-07-07 08:52:43.156

USER: nmr

SOLVENT: CDCl3

Experiment = zgpg30

Pulse length = 9.500 usec

Relaxation delay = 2.000 sec

NA = 202

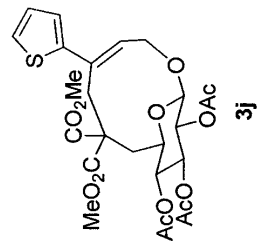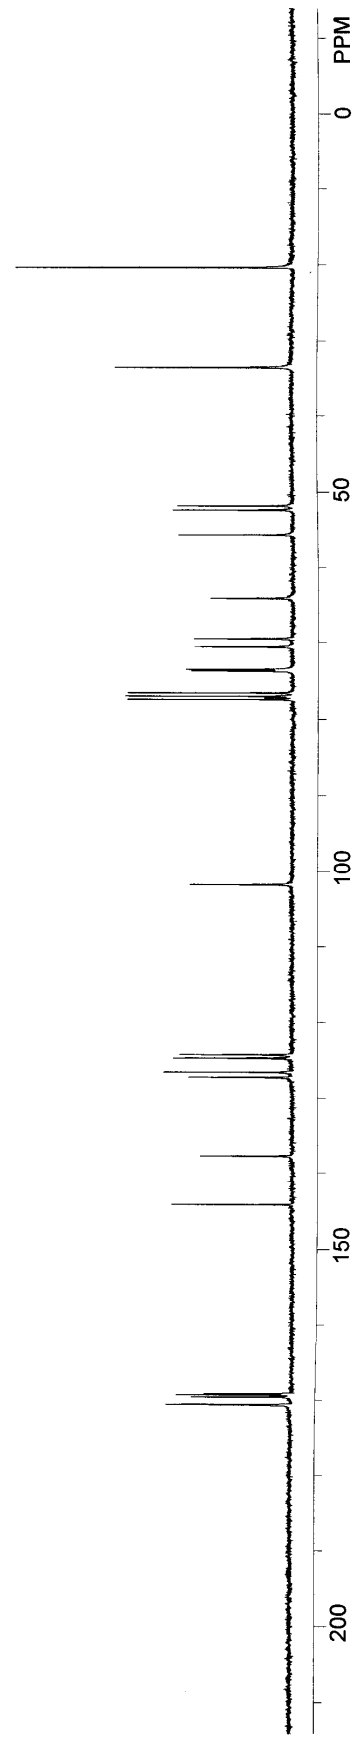

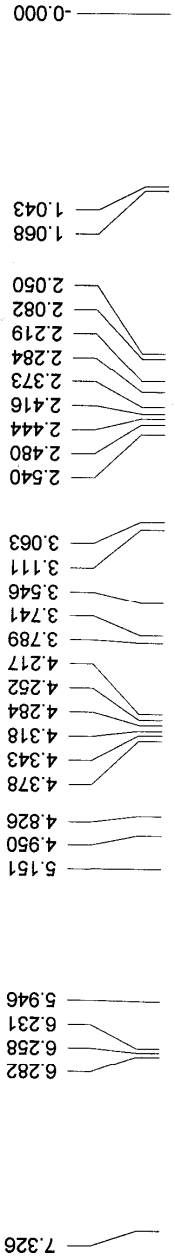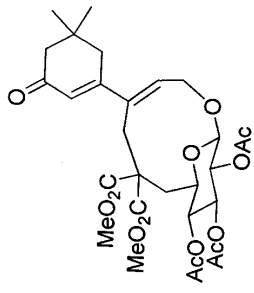

hx-6-78

2012-10-18 21:40:16.093

USER: nmr

SOLVENT: CDCl3

Experiment = zg30

Pulse length = 14.000 usec

Relaxation delay = 1.000 sec

NA = 8

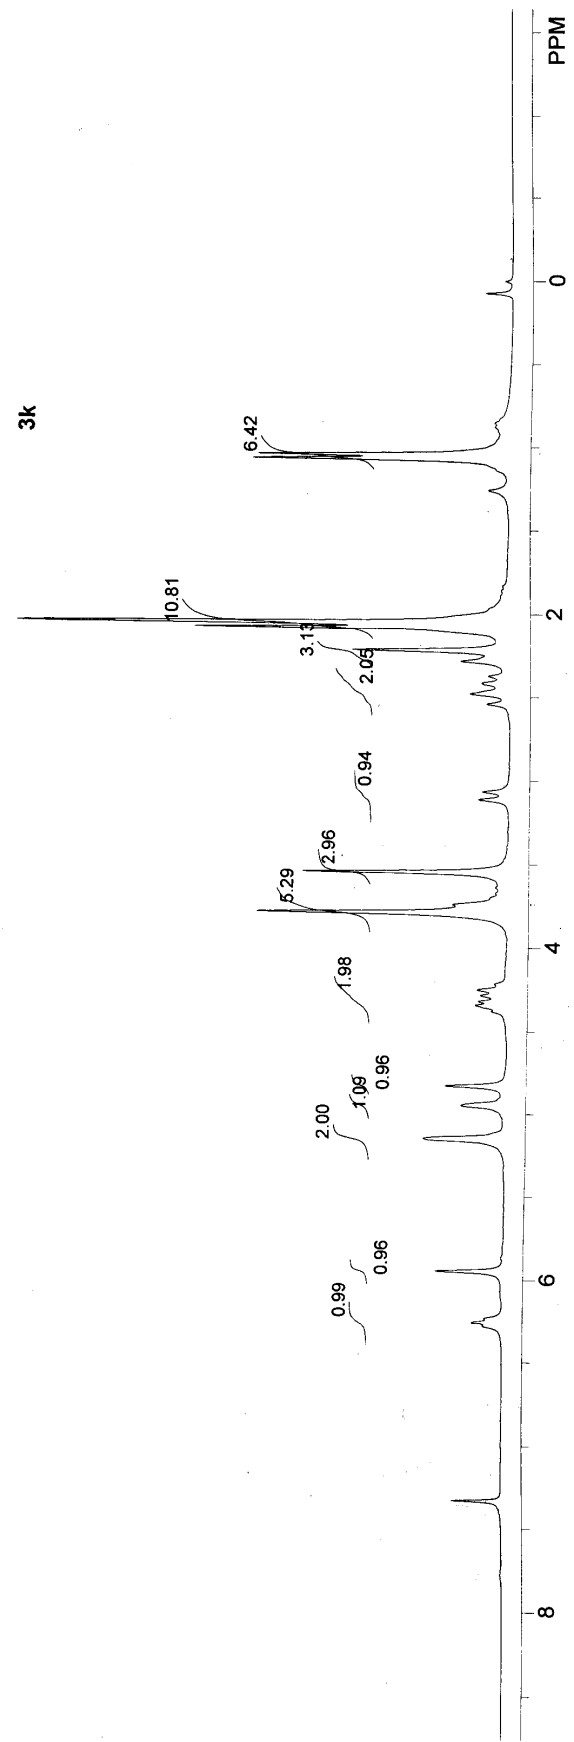

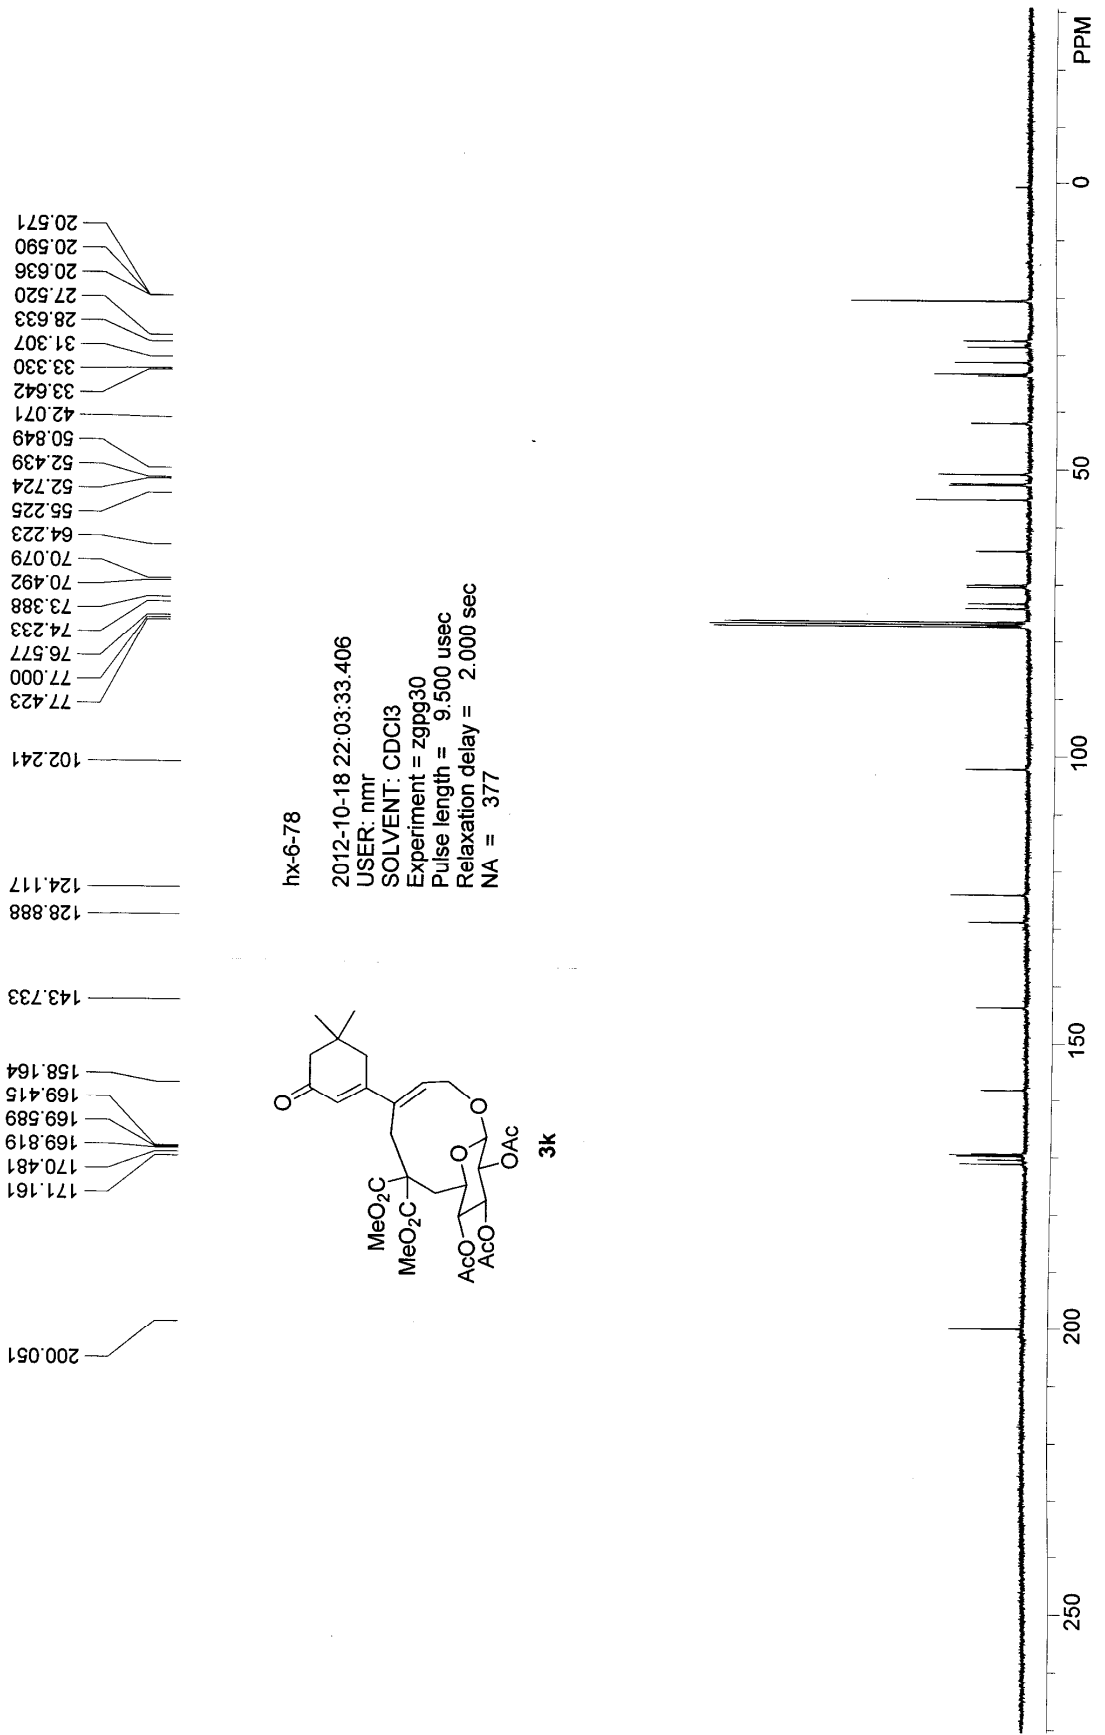

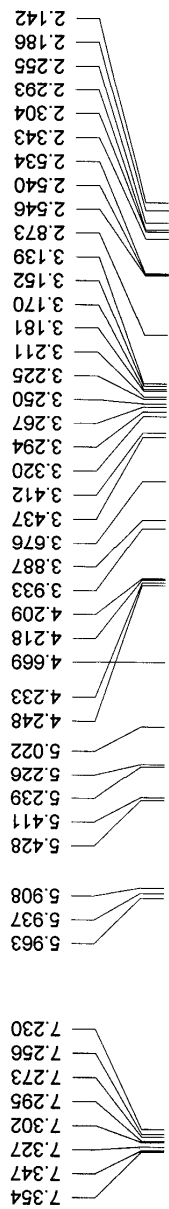

hx-8-143-DMSO  
 2014-02-12 11:55:30.859  
 USER: nmr  
 SOLVENT: DMSO  
 Experiment = zg30  
 Pulse length = 14.000 usec  
 Relaxation delay = 1.000 sec  
 NA = 8

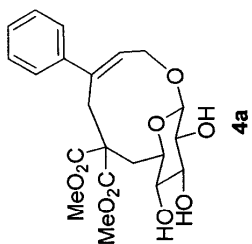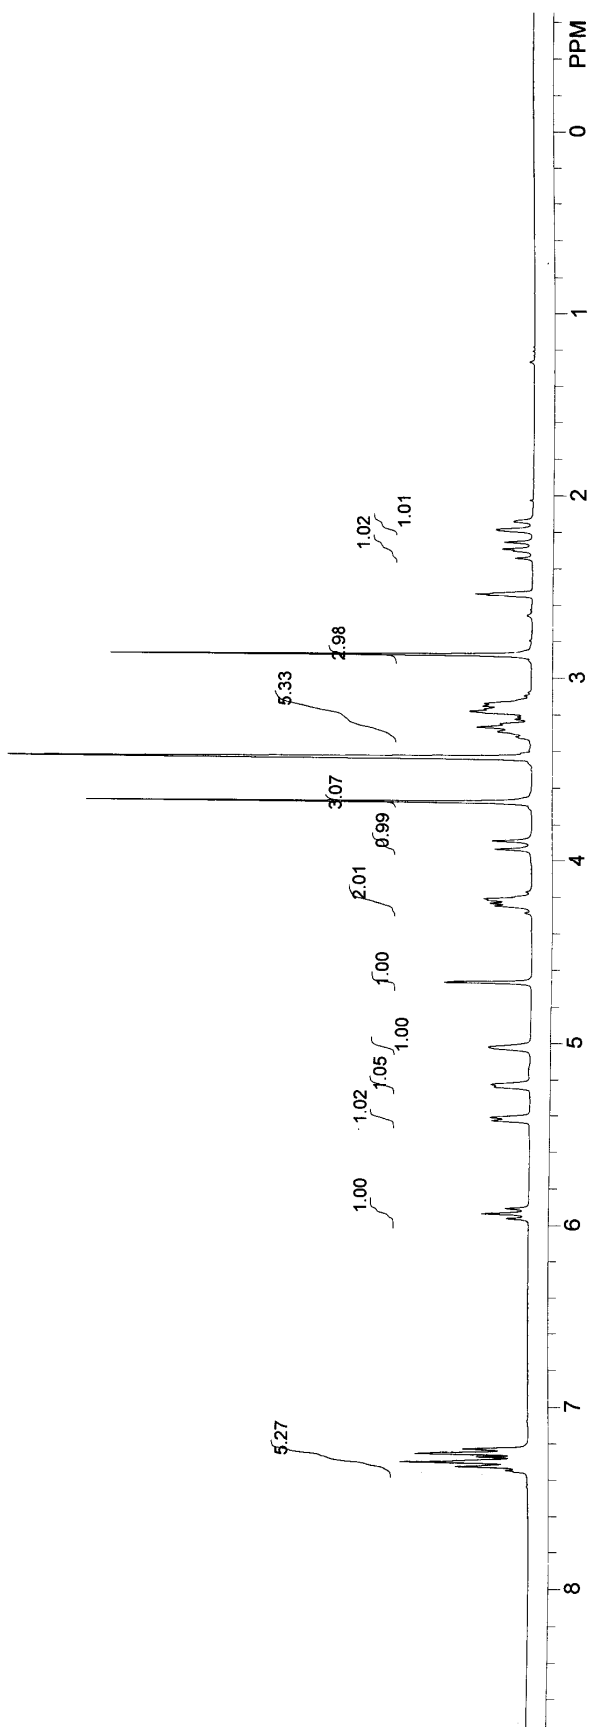

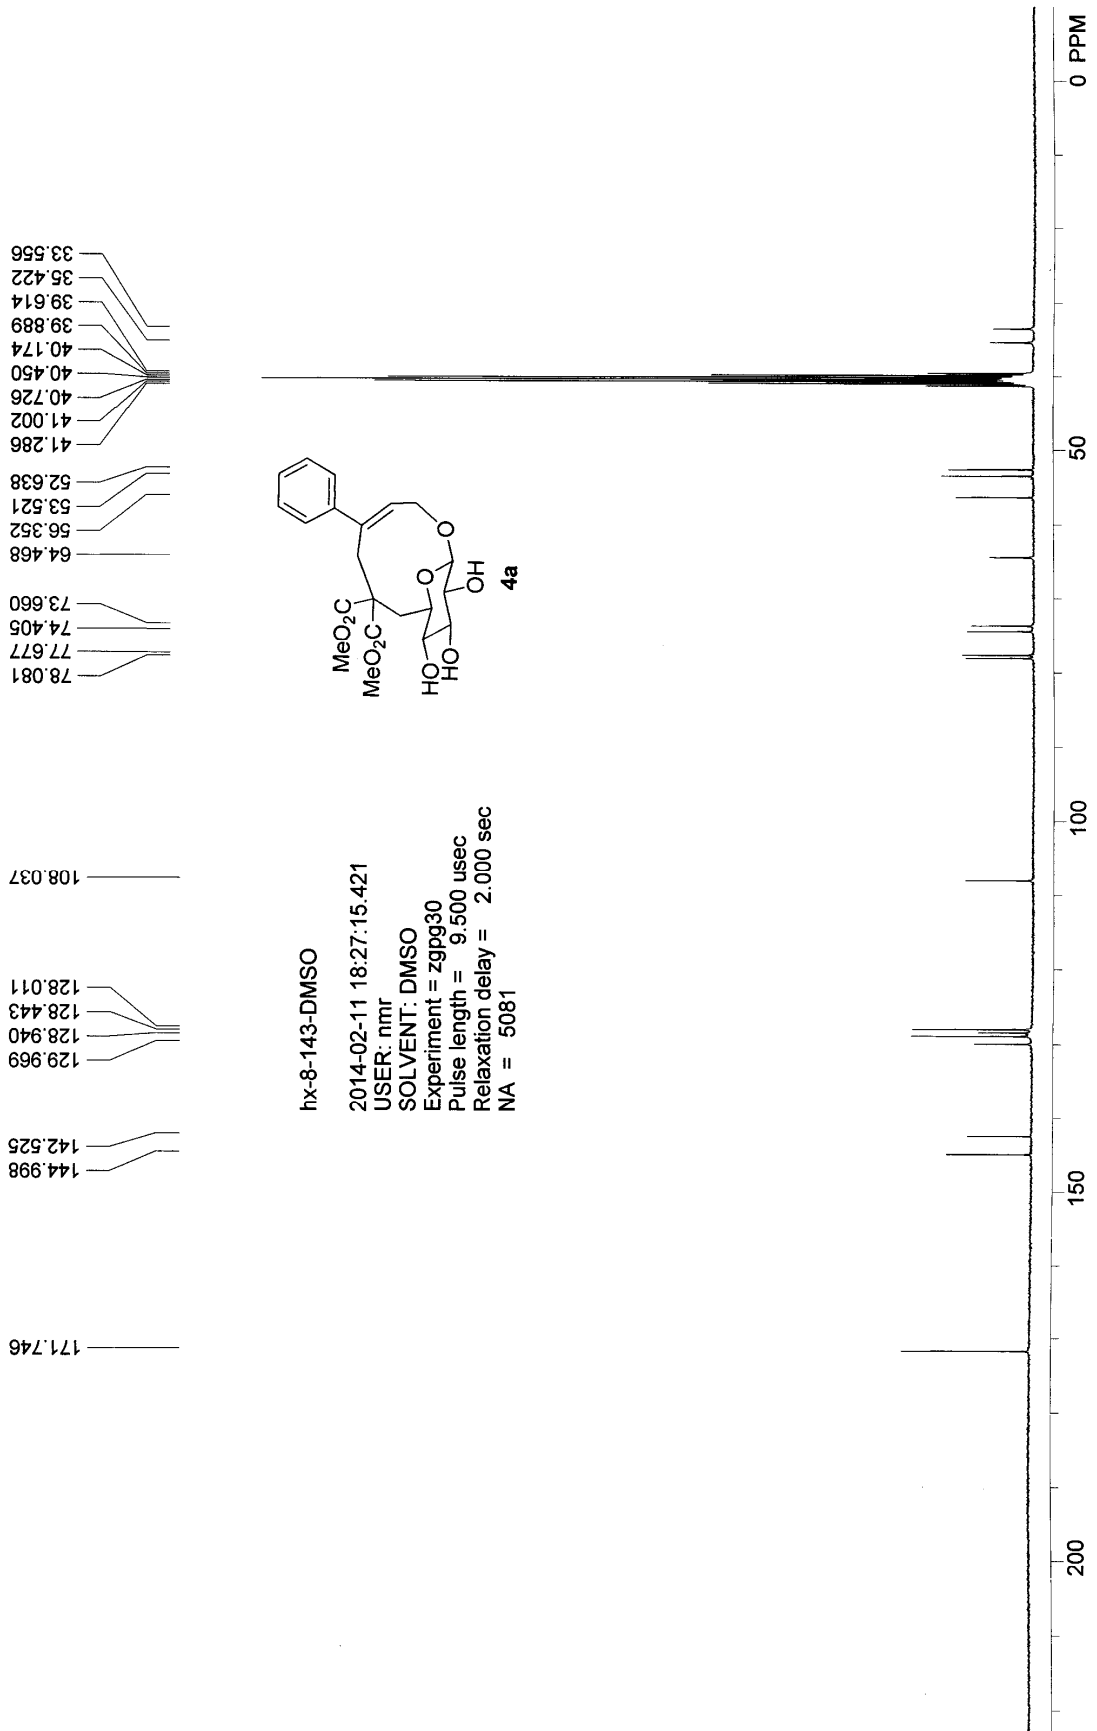

hx-8-143-DMSO

2014-02-11 18:27:15.421

USER: nmr

SOLVENT: DMSO

Experiment = zgpg30

Pulse length = 9.500 usec

Relaxation delay = 2.000 sec

NA = 5081

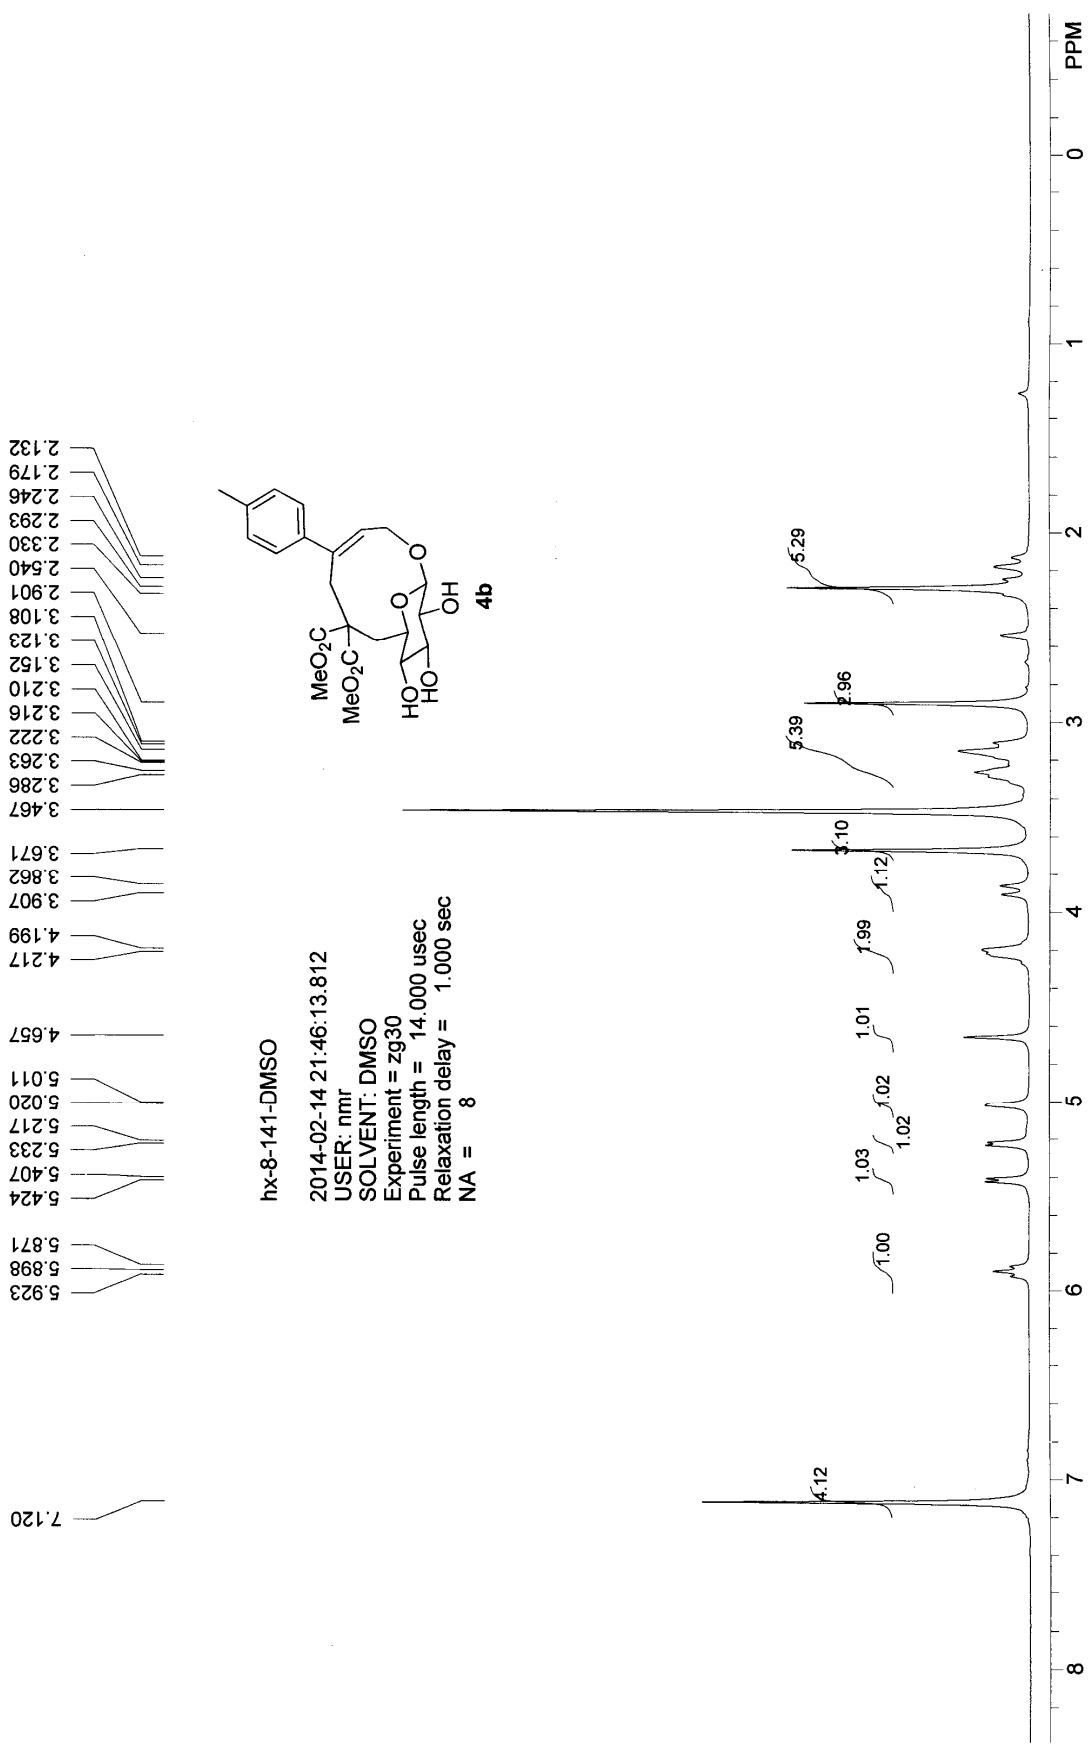

hx-8-141-DMSO  
 2014-02-14 21:46:13.812  
 USER: nmr  
 SOLVENT: DMSO  
 Experiment = zg30  
 Pulse length = 14.000 usec  
 Relaxation delay = 1.000 sec  
 NA = 8

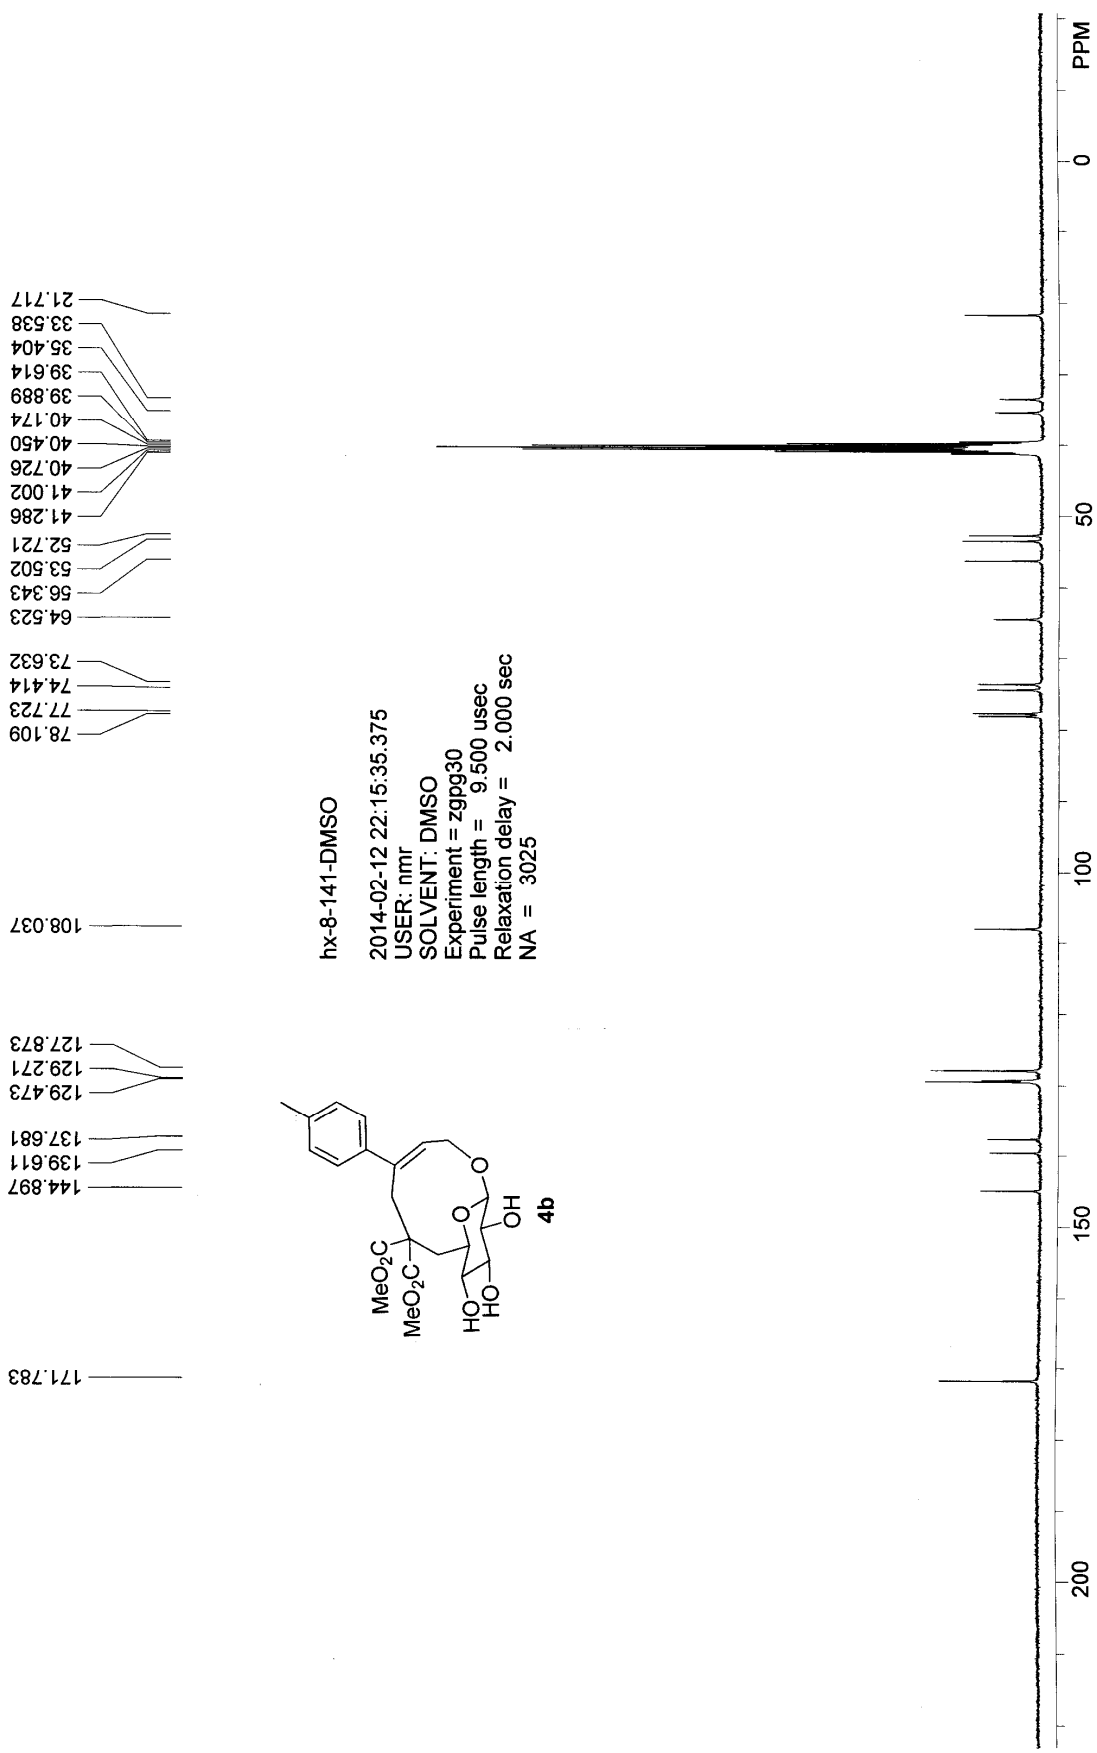

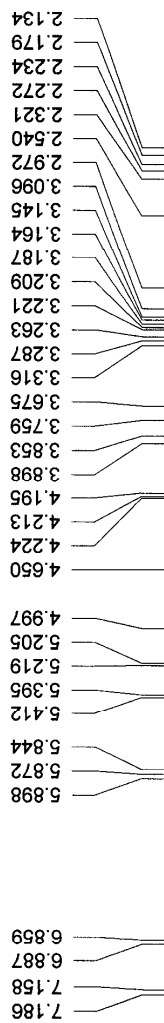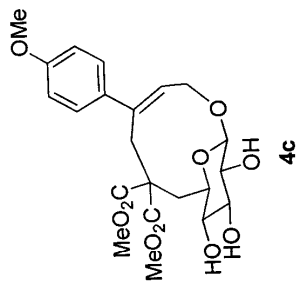

hx-8-138-DMSO

2014-02-14 21:53:41.046

USER: nmr

SOLVENT: DMSO

Experiment = zg30

Pulse length = 14.000 usec

Relaxation delay = 1.000 sec

NA = 8

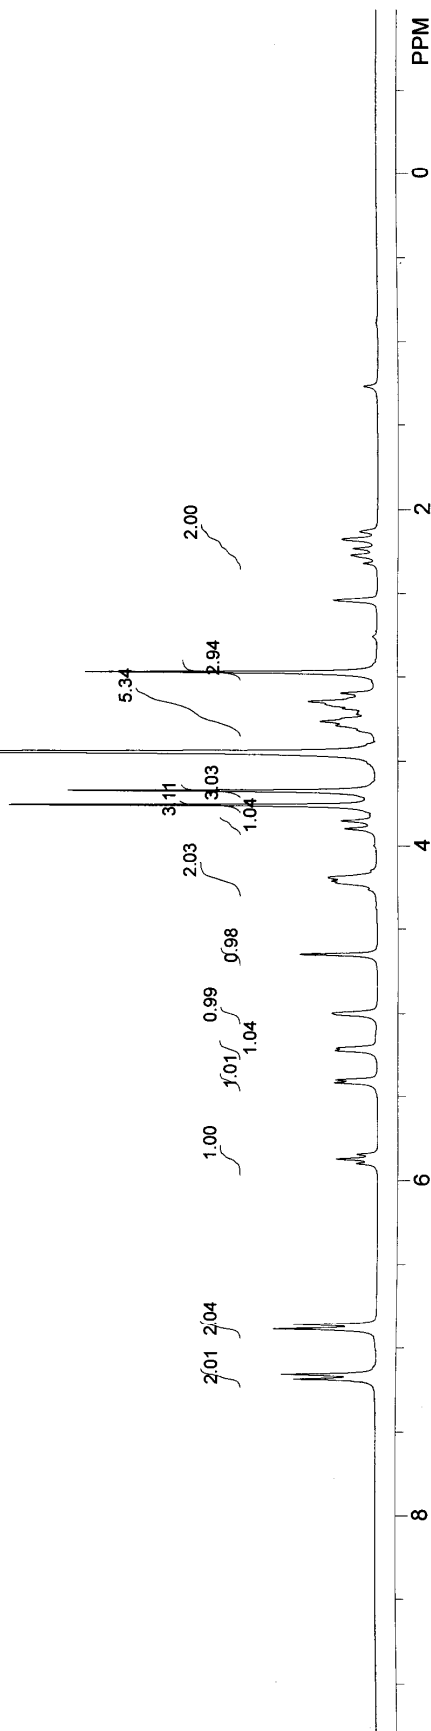



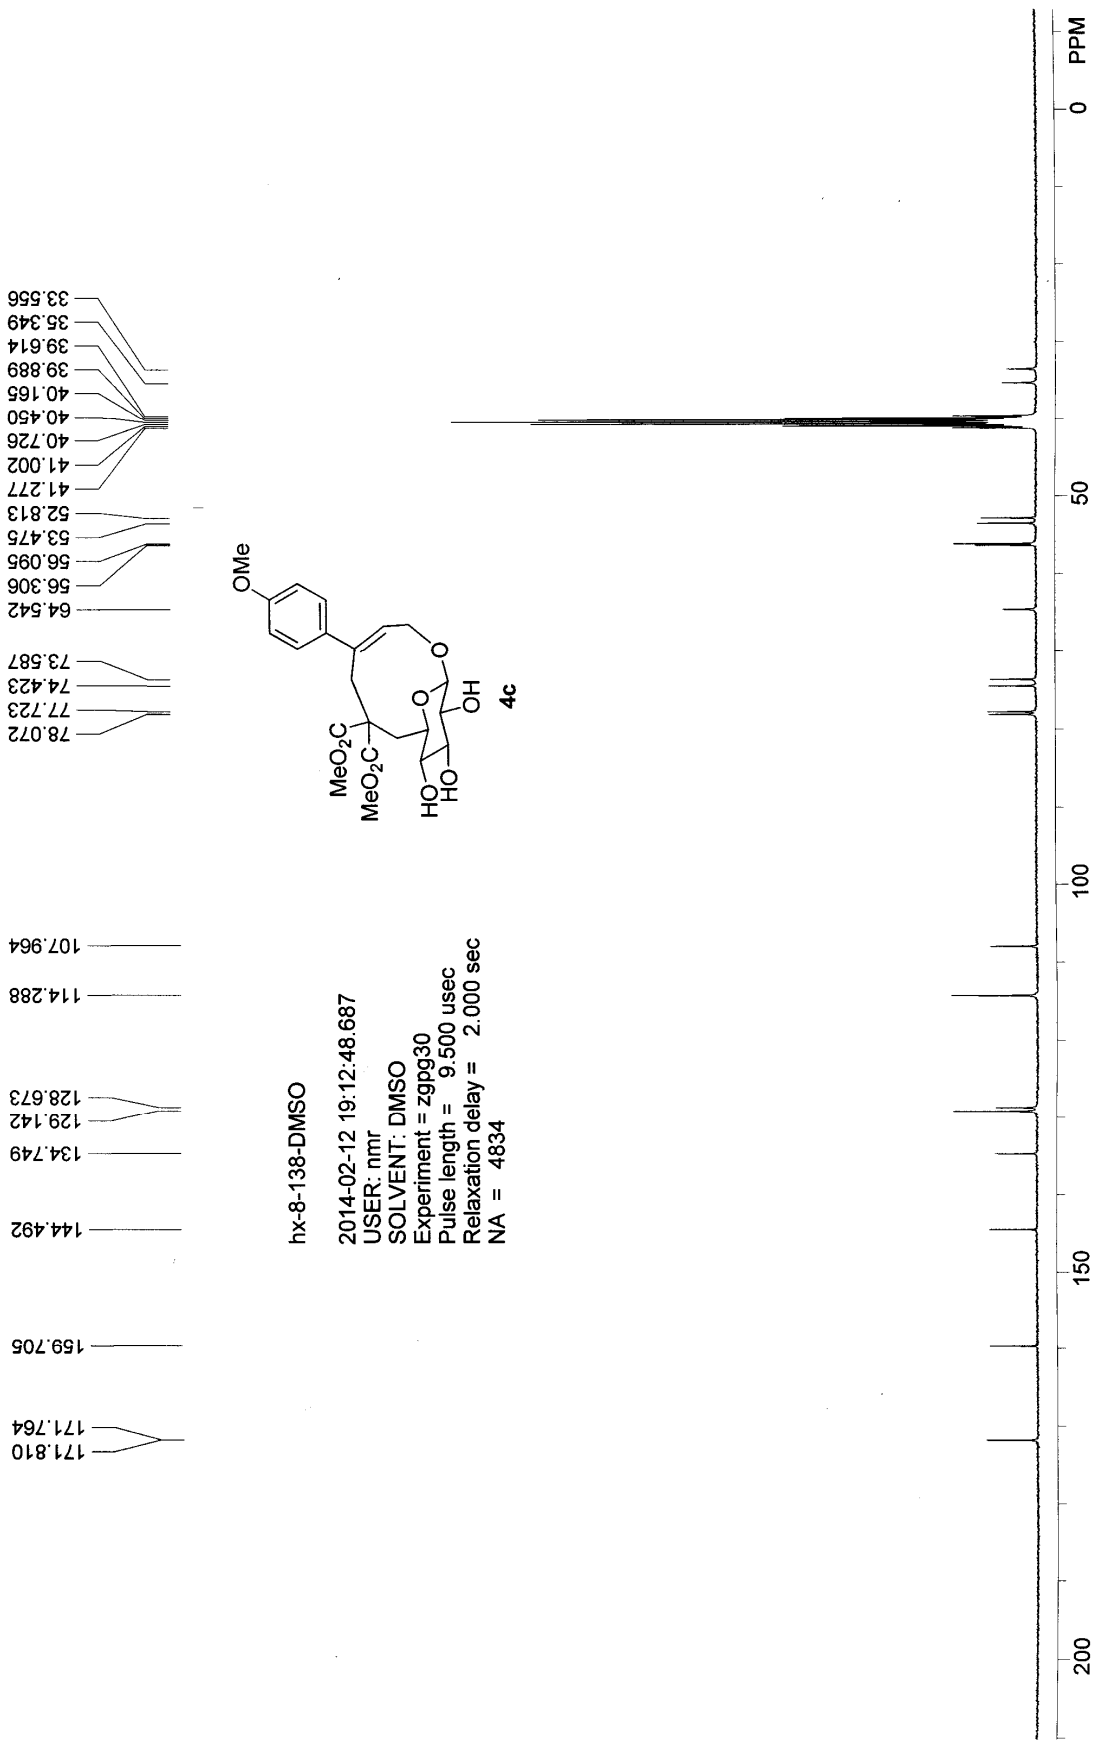

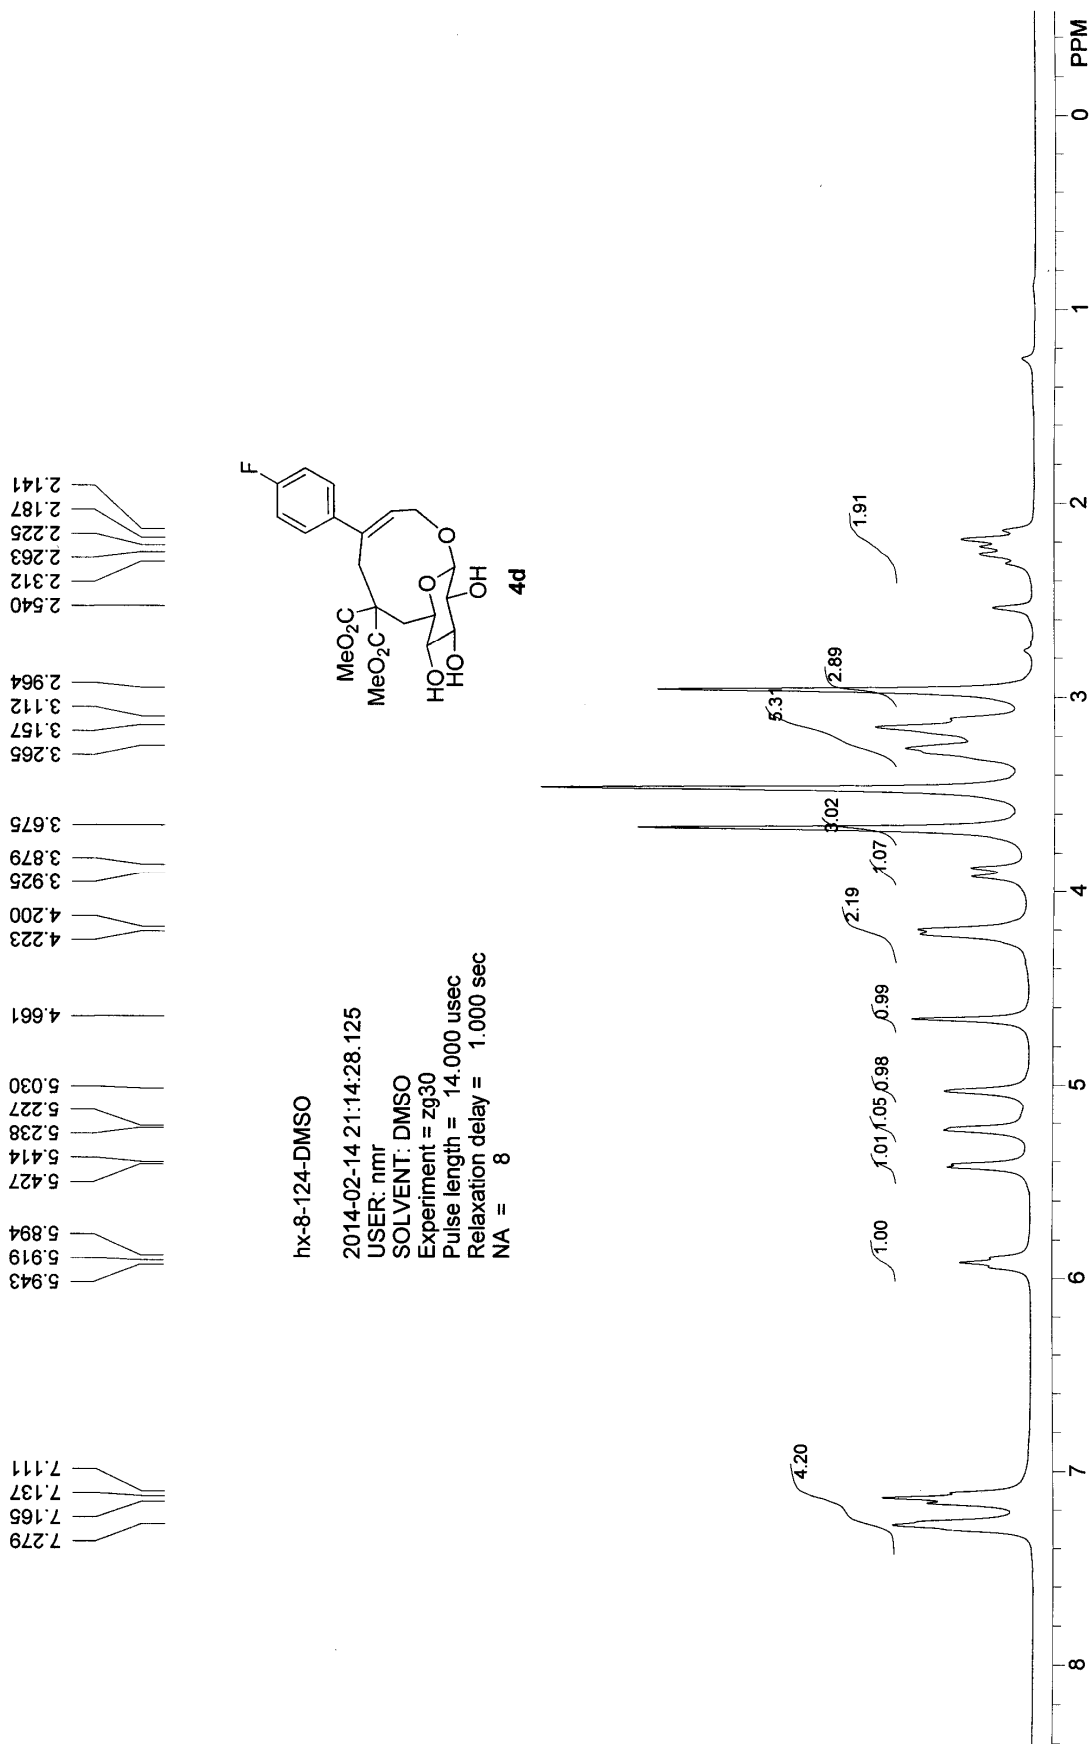

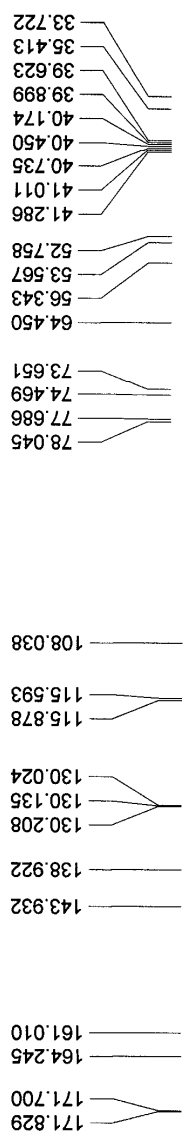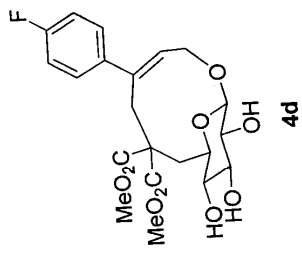

hx-8-124-DMSO

2014-02-14 13:59:31.812  
 USER: nmr  
 SOLVENT: DMSO  
 Experiment = zgpg30  
 Pulse length = 9.500 usec  
 Relaxation delay = 2.000 sec  
 NA = 3790

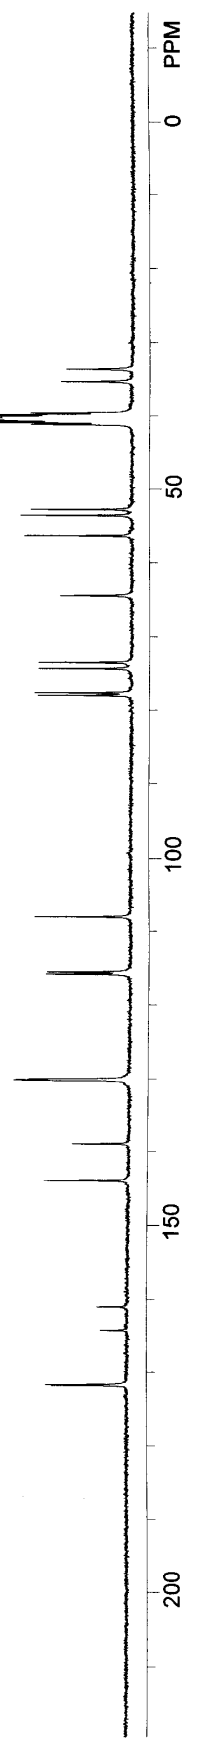

114.339

0.000

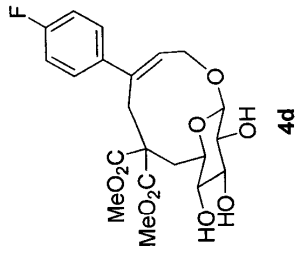

hx-8-124-DMSO

2014-02-15 14:19:53.968

USER: nmr

SOLVENT: DMSO

Experiment = zgfgan

Pulse length = 13.500 usec

Relaxation delay = 1.000 sec

NA = 16

20 0 -20 -40 -60 -80 -100 -120 -140 PPM

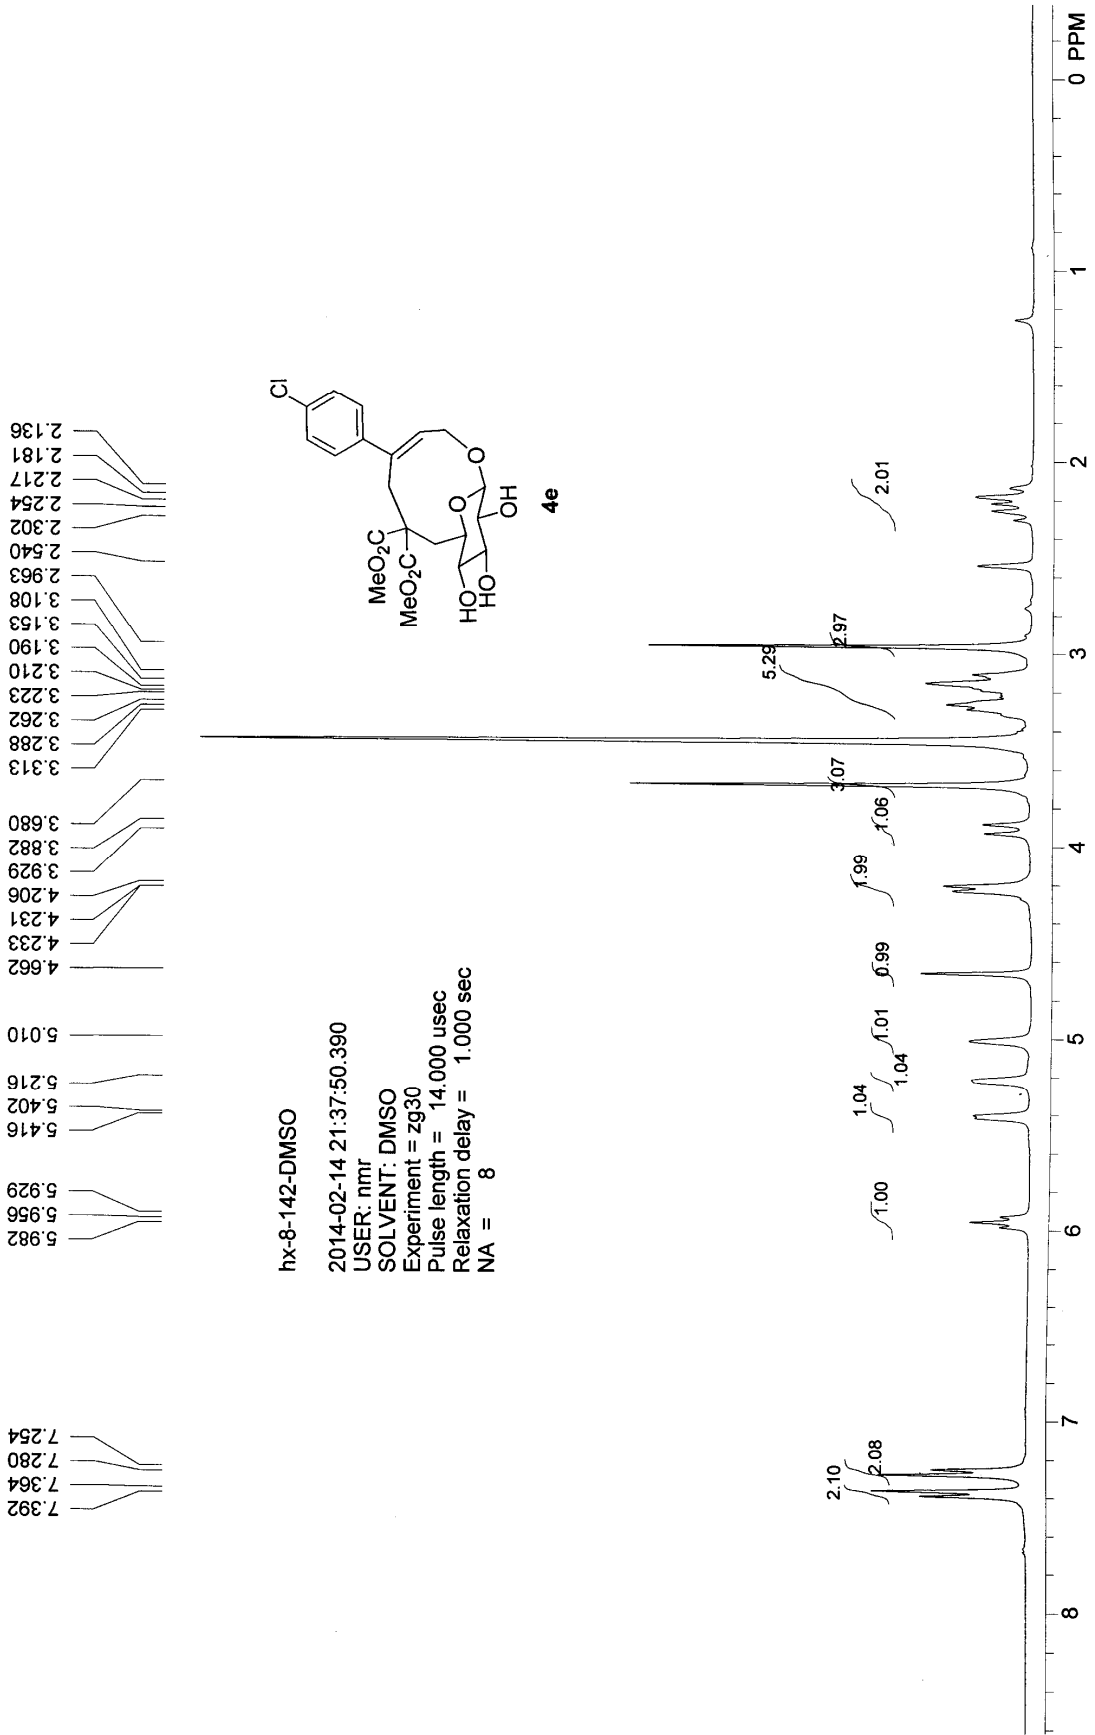

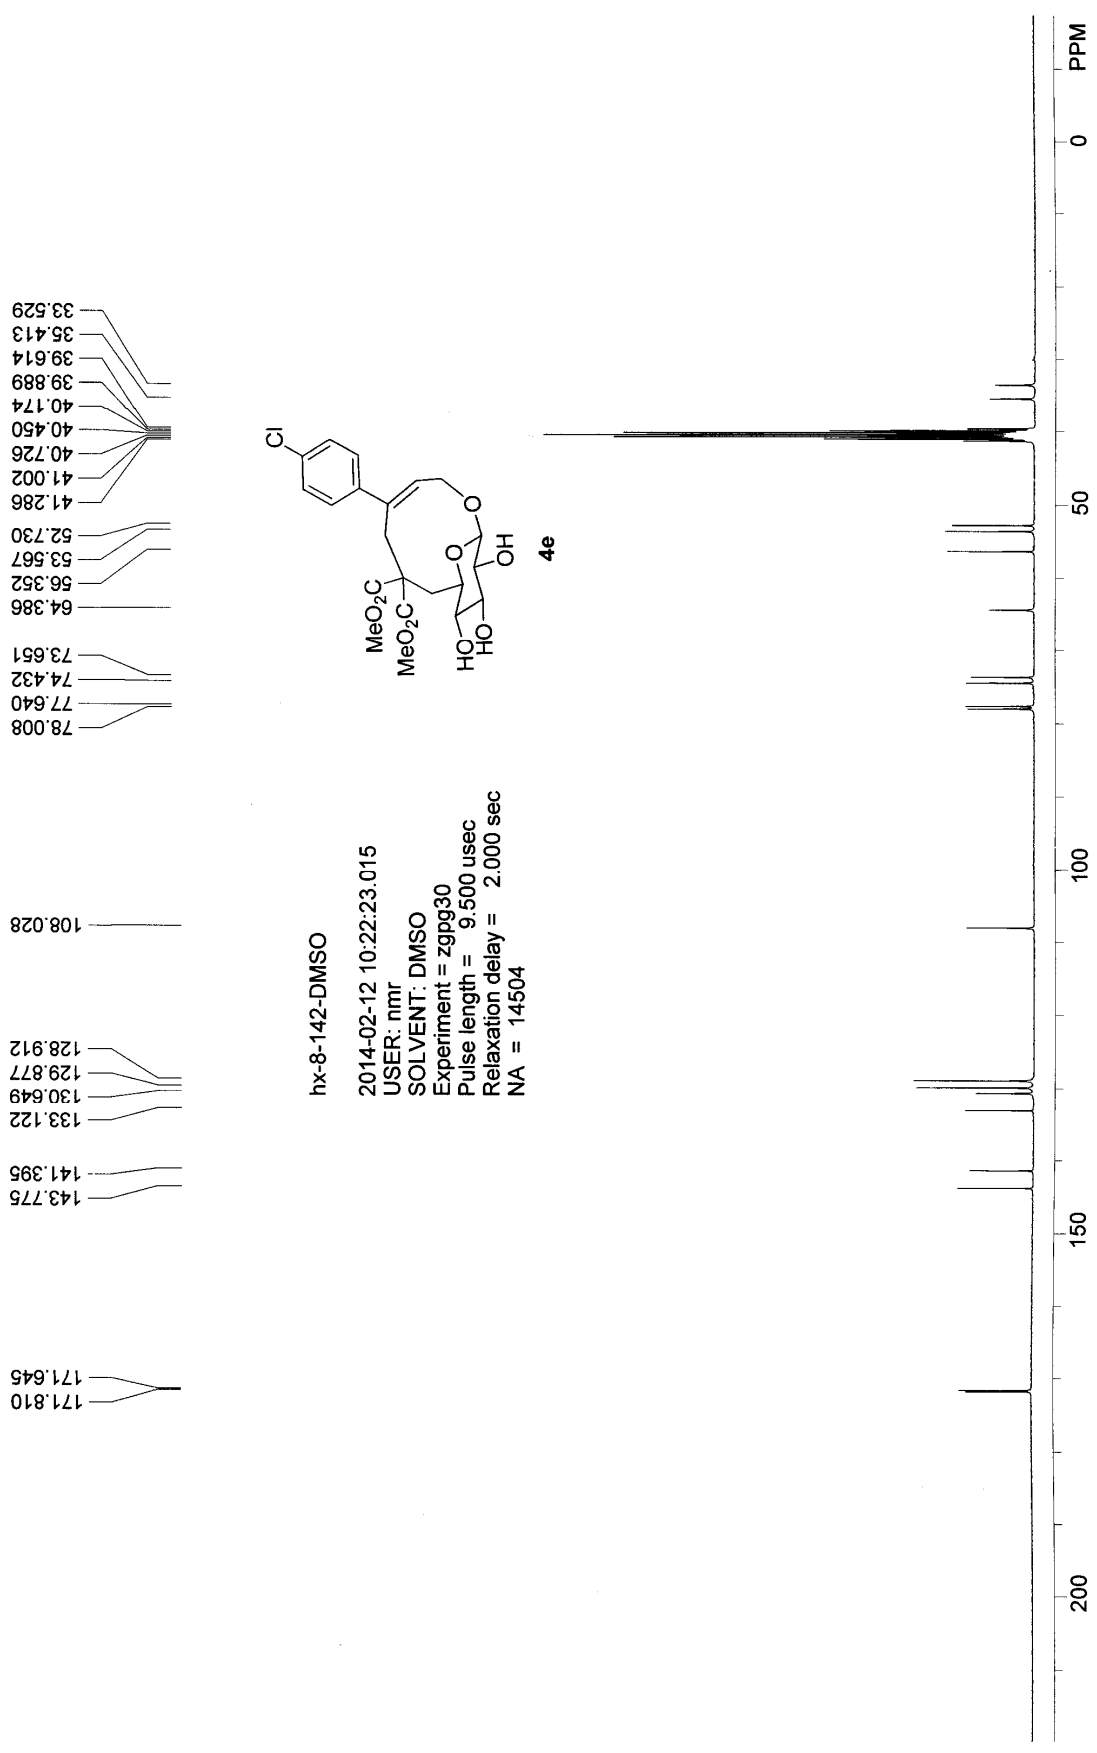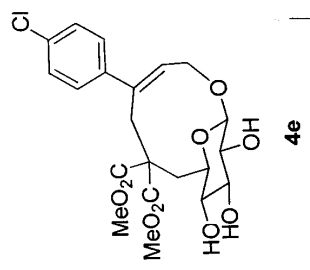

hx-8-142-DMSO  
 2014-02-12 10:22:23.015  
 USER: nmr  
 SOLVENT: DMSO  
 Experiment = zgpg30  
 Pulse length = 9.500 usec  
 Relaxation delay = 2.000 sec  
 NA = 14504

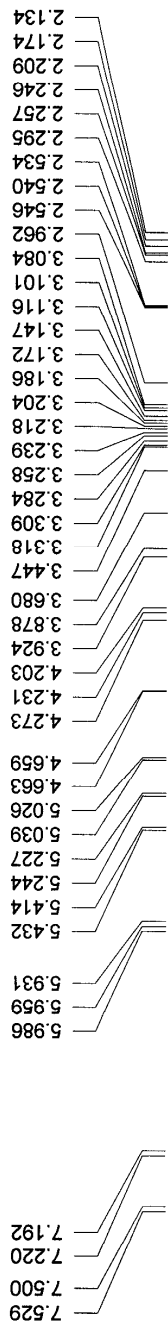

hx-8-123-DMSO

2014-02-14 10:11:37.796

USER: nmr

SOLVENT: DMSO

Experiment = zg30

Pulse length = 14.000 usec

Relaxation delay = 1.000 sec

NA = 8

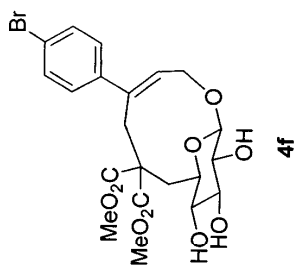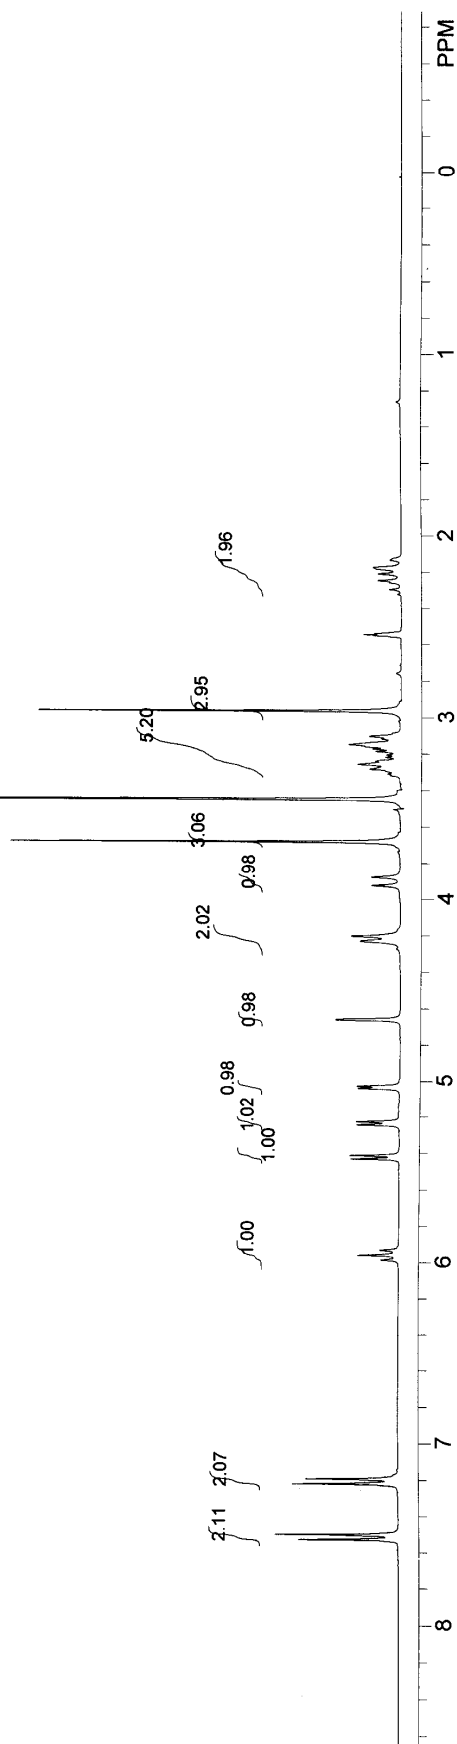

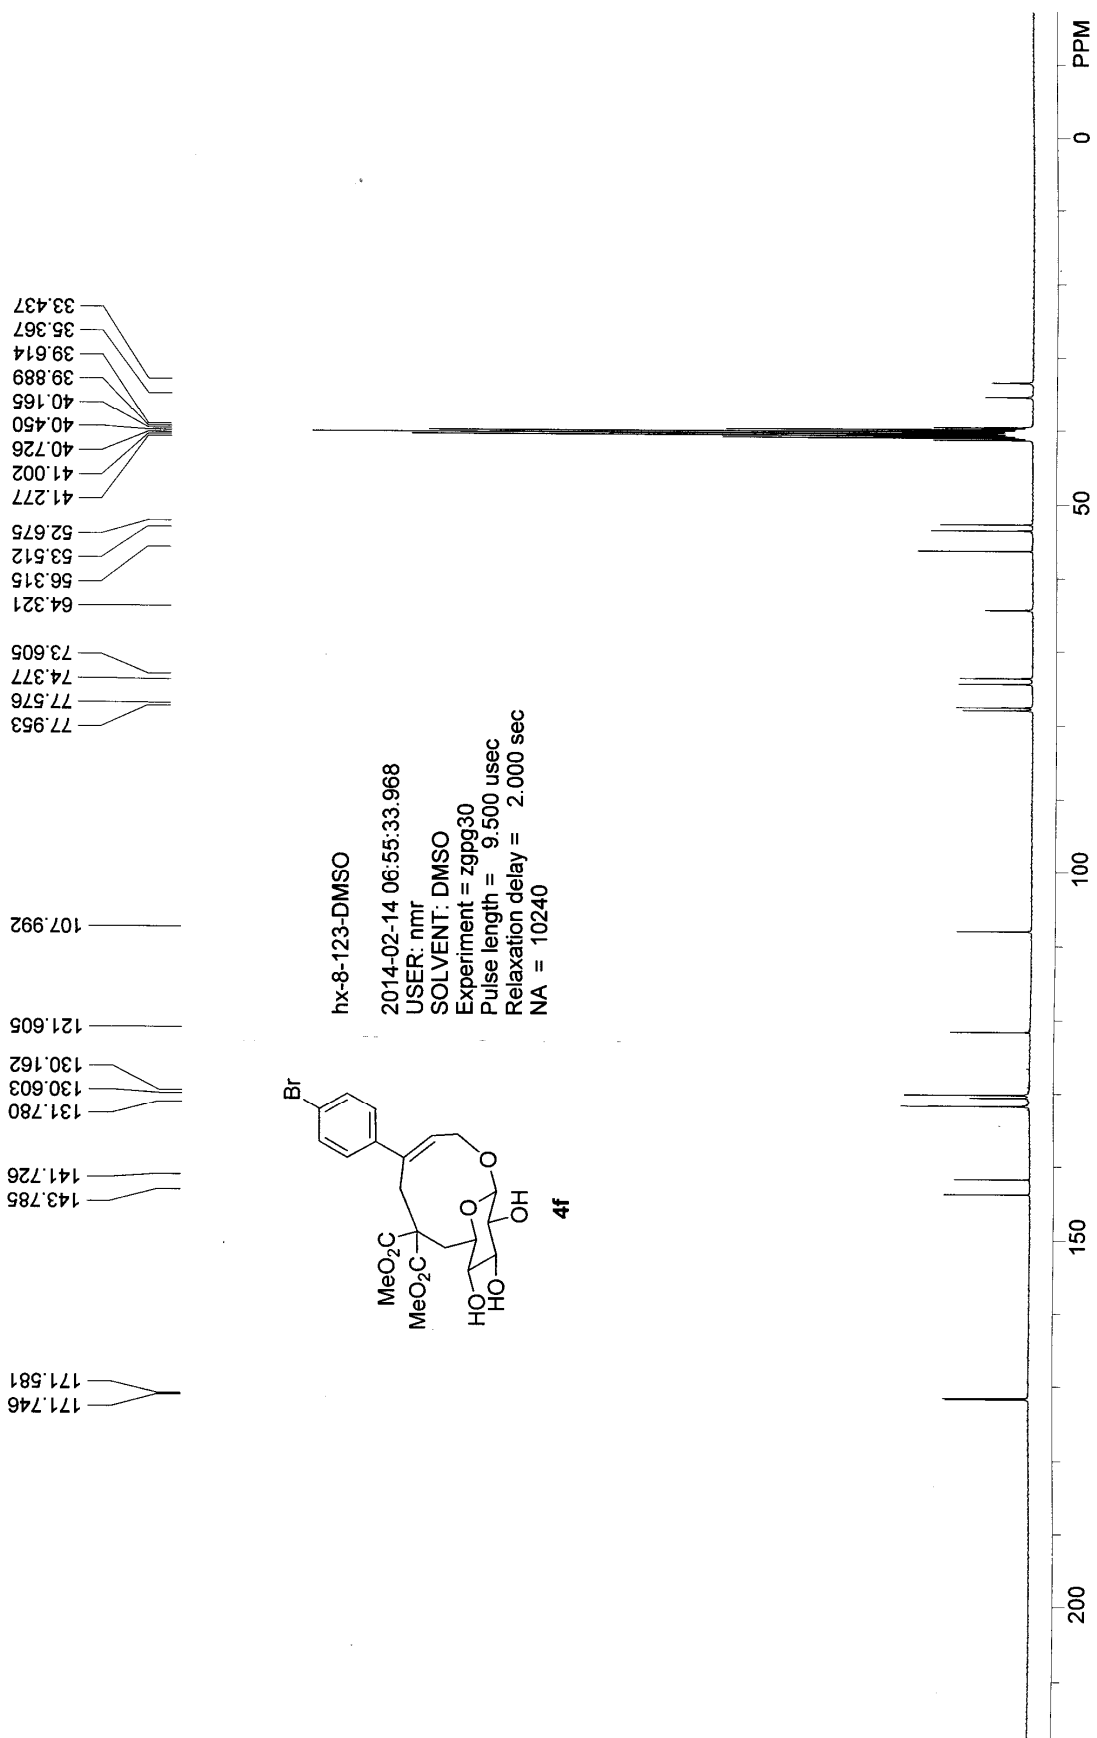



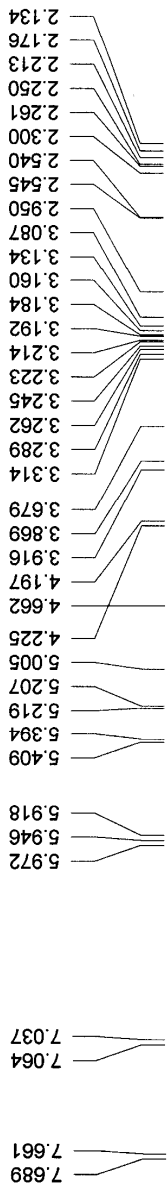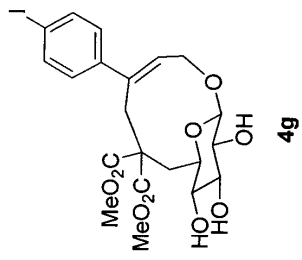

hx-8-127-DMSO  
 2014-02-14 14:05:02.312  
 USER: nmr  
 SOLVENT: DMSO  
 Experiment = zg30  
 Pulse length = 14.000 usec  
 Relaxation delay = 1.000 sec  
 NA = 8

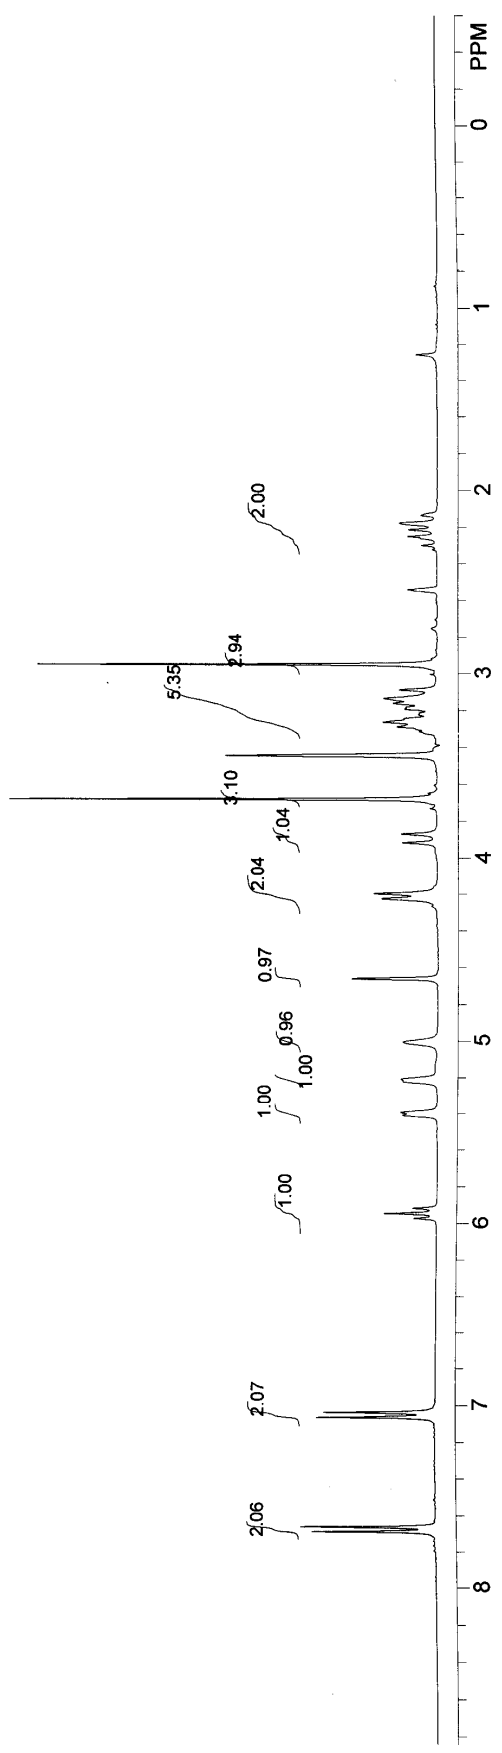

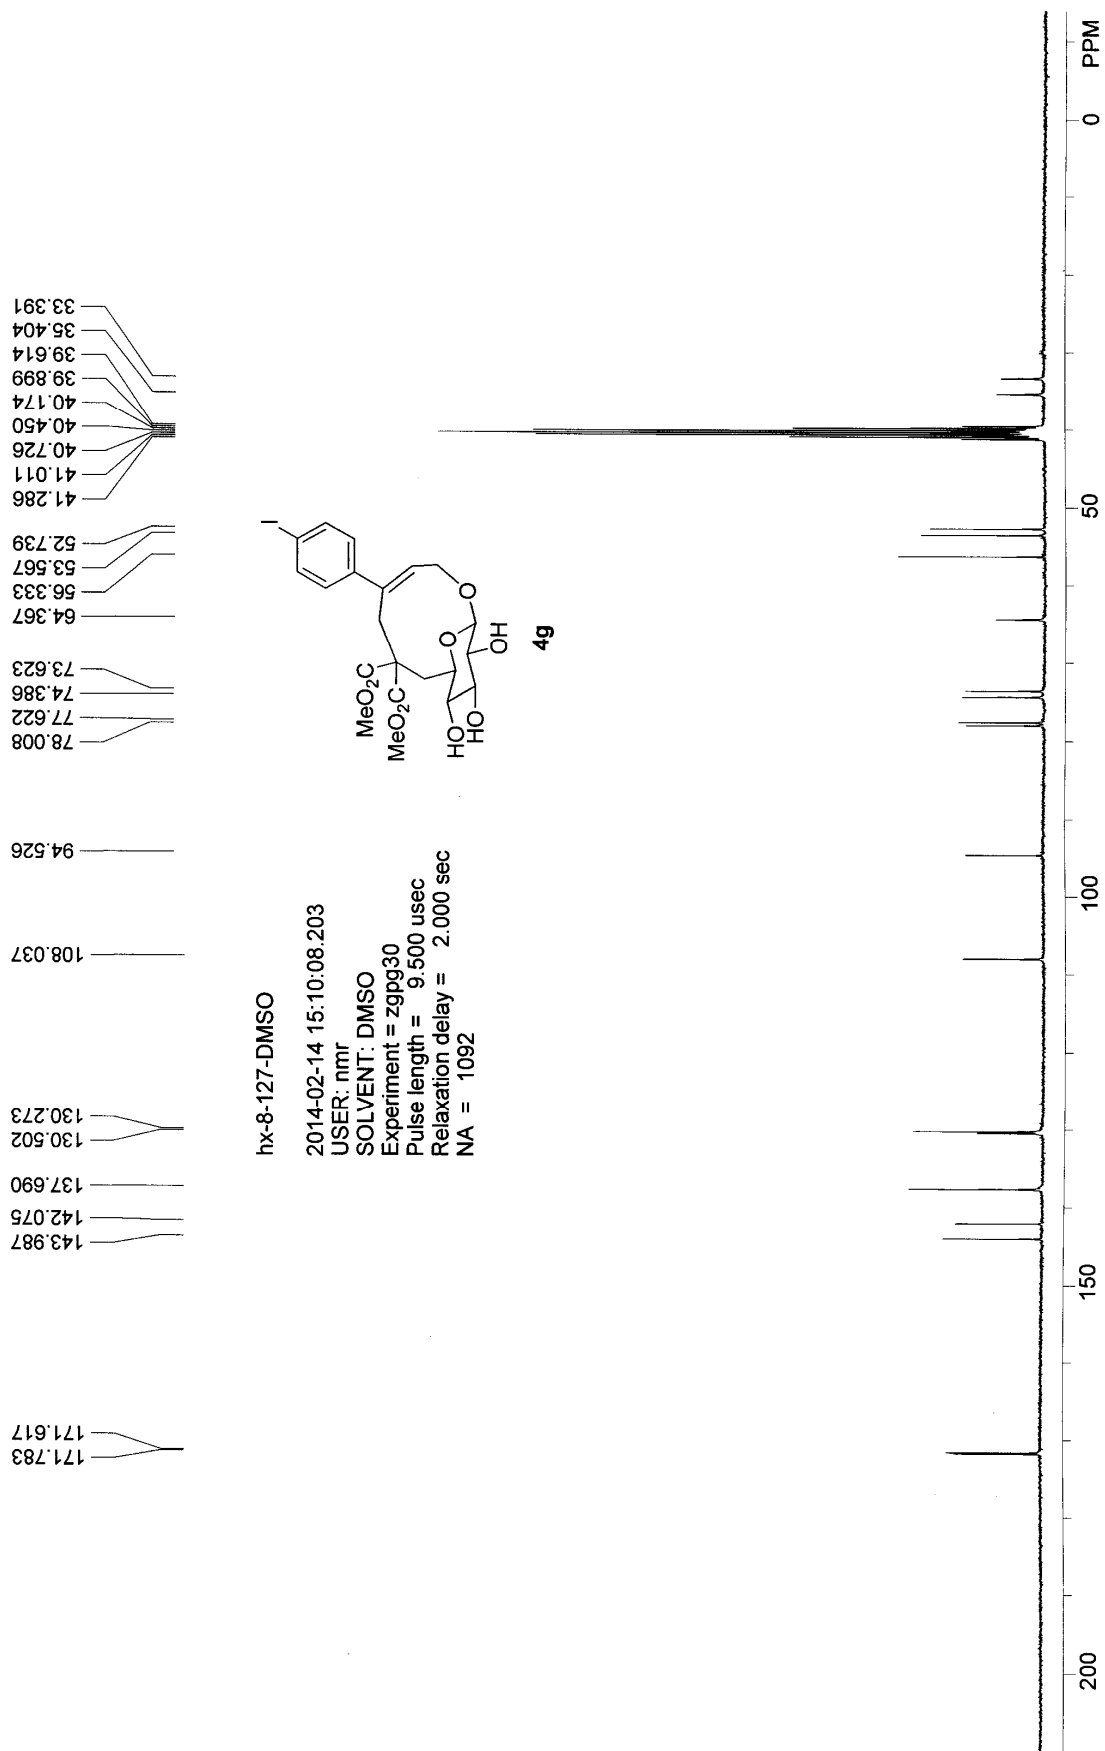

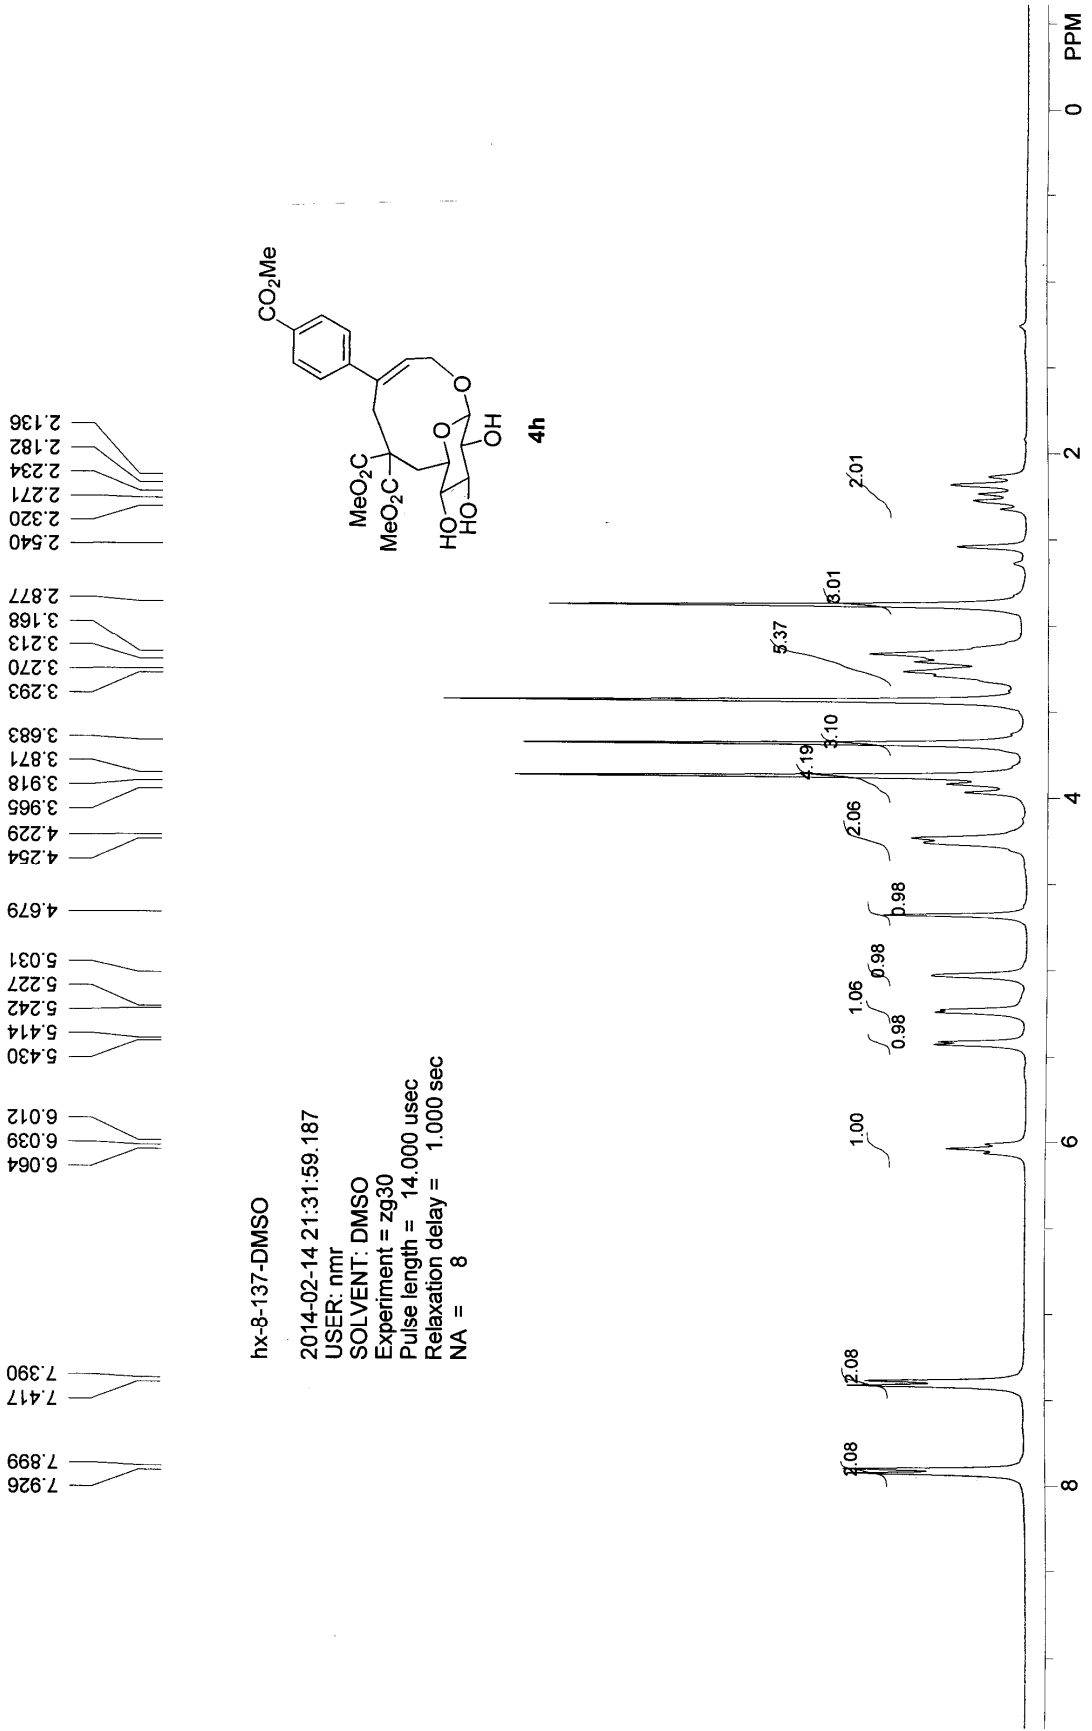

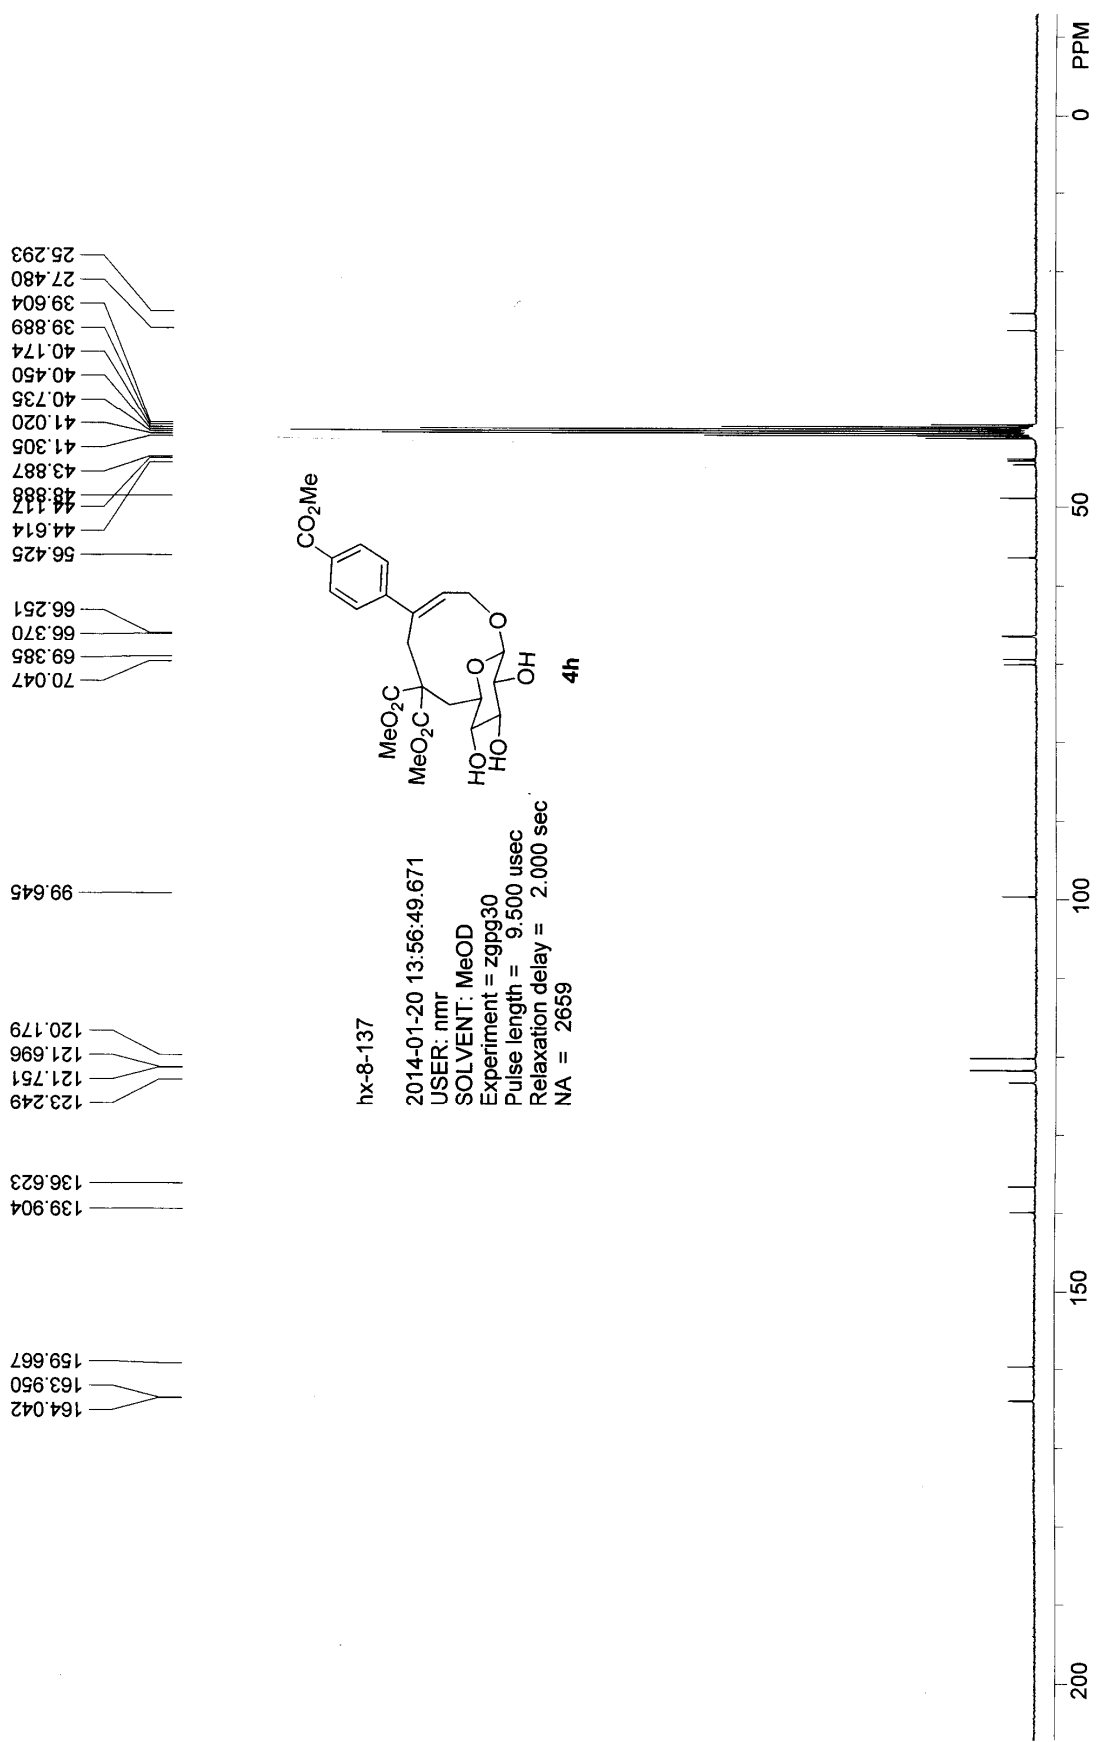

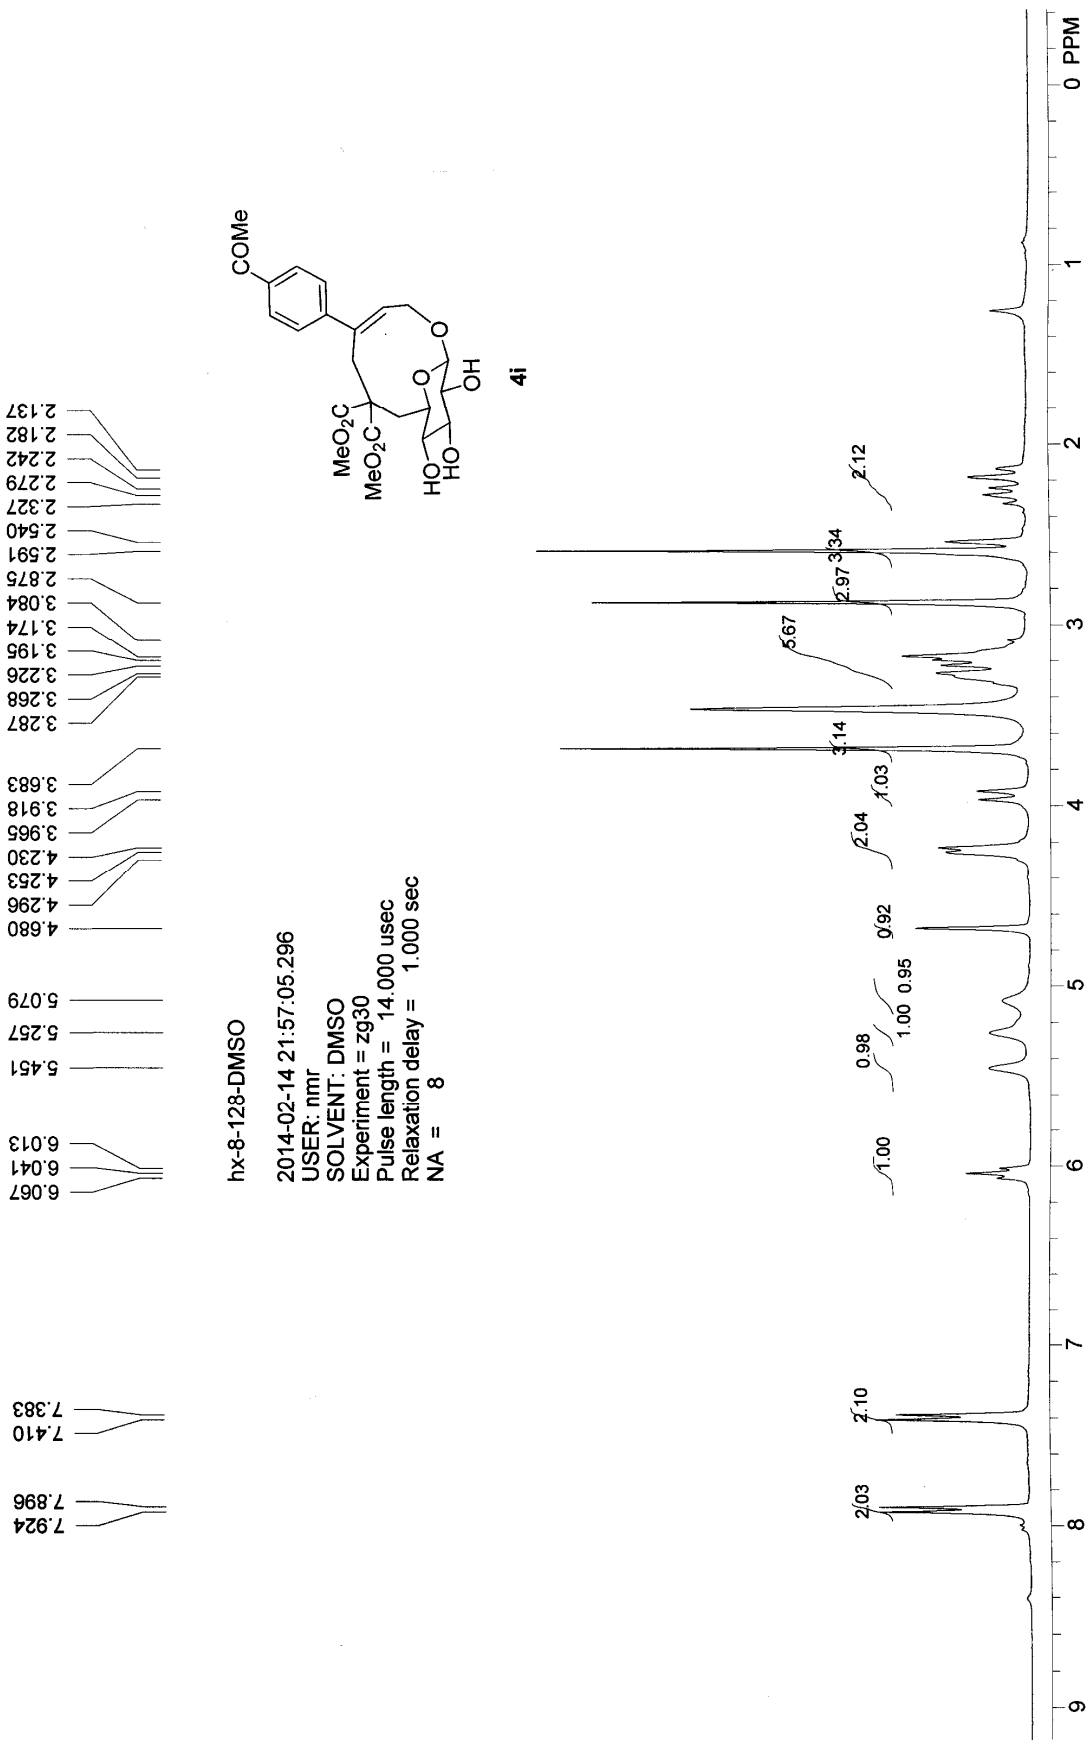

hx-8-128-DMSO

2014-02-14 21:57:05.296

USER: nmr

SOLVENT: DMSO

Experiment = zg30

Pulse length = 14.000 usec

Relaxation delay = 1.000 sec

NA = 8

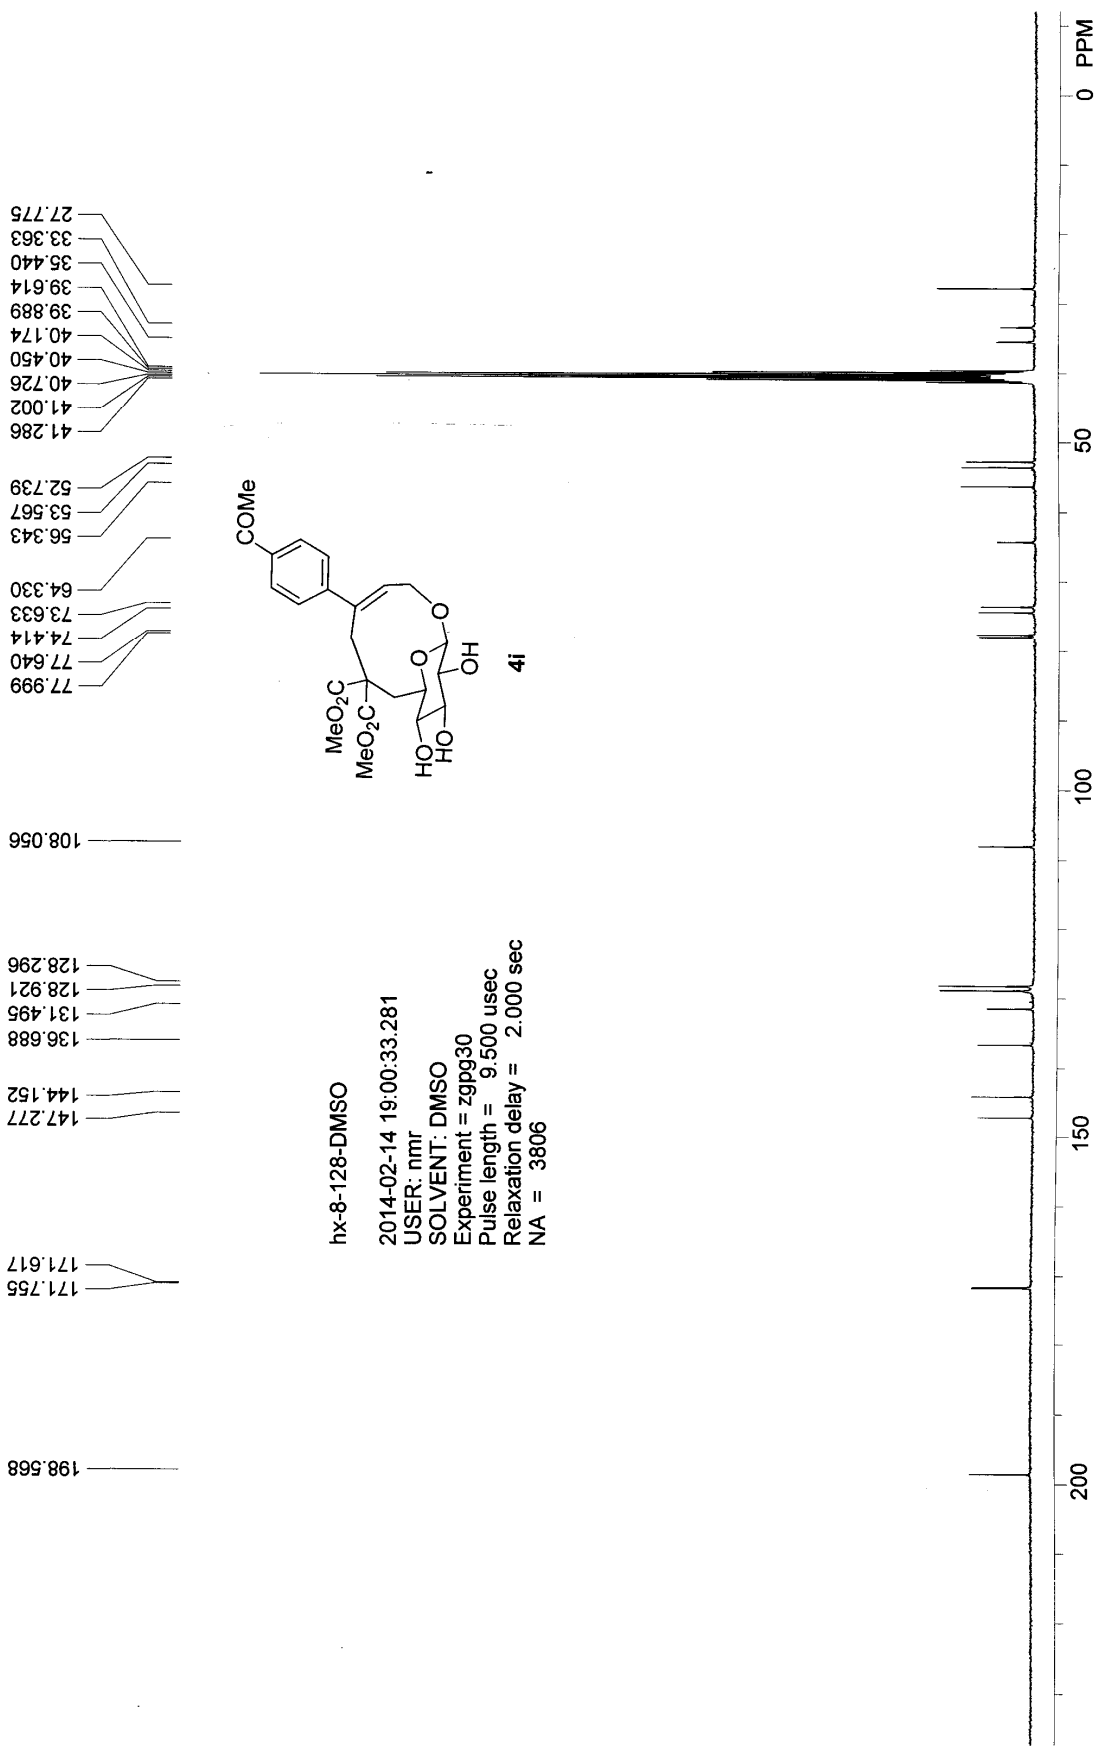

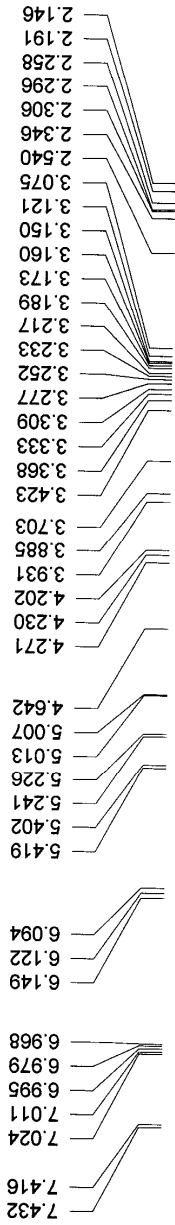

hx-8-129-DMSO

2014-02-14 21:50:07.625

USER: nmr

SOLVENT: DMSO

Experiment = zg30

Pulse length = 14.000 usec

Relaxation delay = 1.000 sec

NA = 8

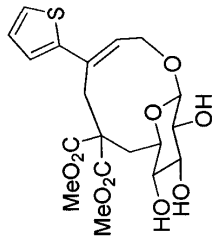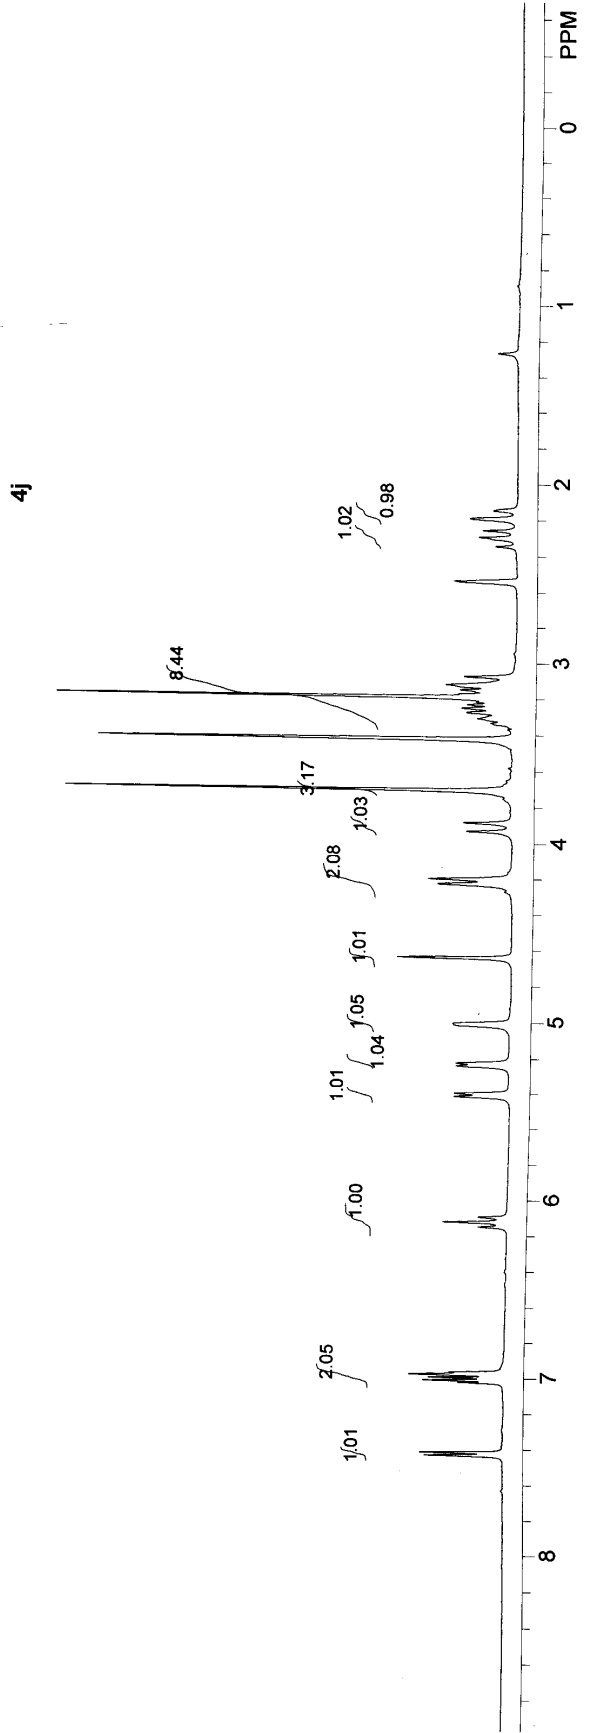

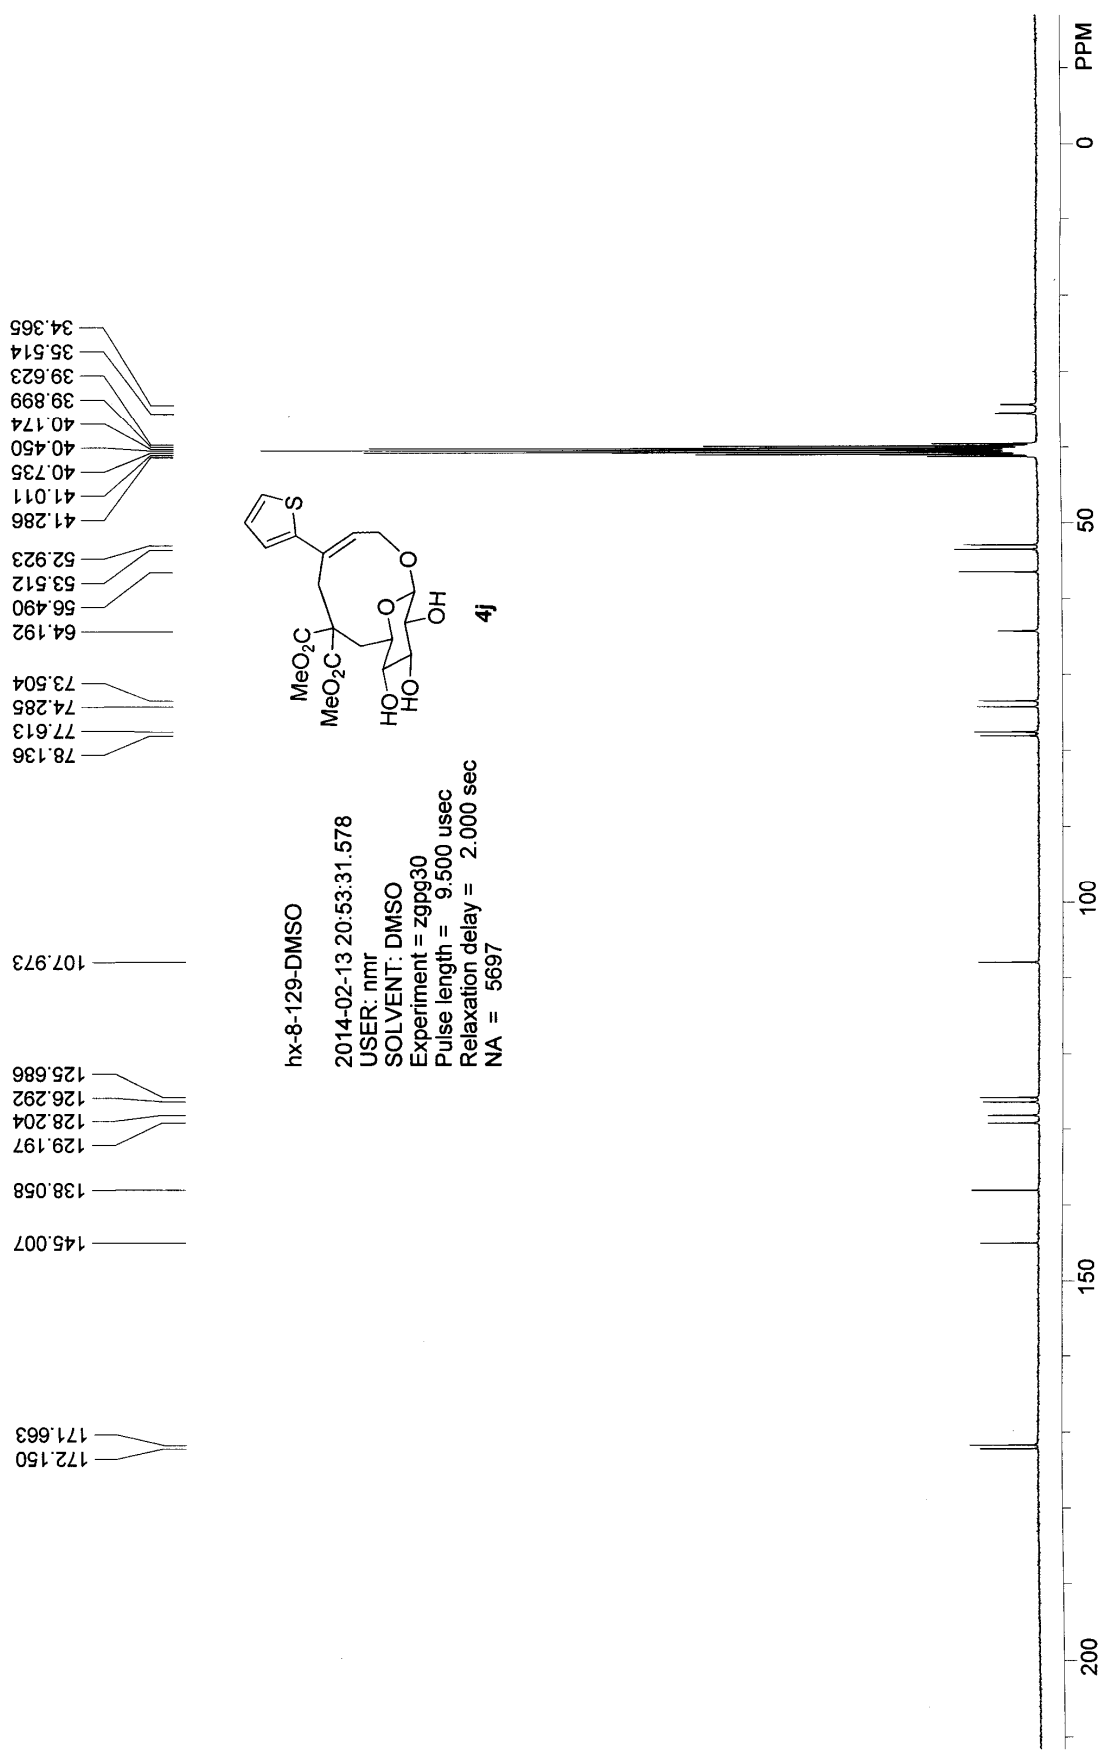



0.979  
 1.028  
 2.065  
 2.098  
 2.115  
 2.152  
 2.193  
 2.246  
 2.535  
 2.540  
 2.546  
 2.561  
 2.621  
 2.914  
 2.961  
 3.083  
 3.108  
 3.130  
 3.144  
 3.157  
 3.169  
 3.190  
 3.213  
 3.232  
 3.252  
 3.262  
 3.277  
 3.287  
 3.481  
 3.715  
 3.757  
 3.804  
 4.032  
 4.204  
 5.017  
 5.028  
 5.227  
 5.244  
 5.402  
 5.419  
 5.840  
 6.291  
 6.319  
 6.347

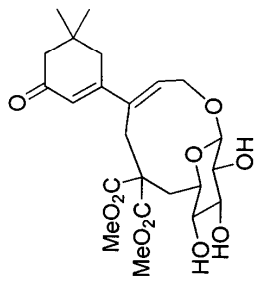

4k  
 hx-8-136-DMSO  
 2014-02-14 22:08:35.484  
 USER: nmr  
 SOLVENT: DMSO  
 Experiment = zg30  
 Pulse length = 14.000 usec  
 Relaxation delay = 1.000 sec  
 NA = 8

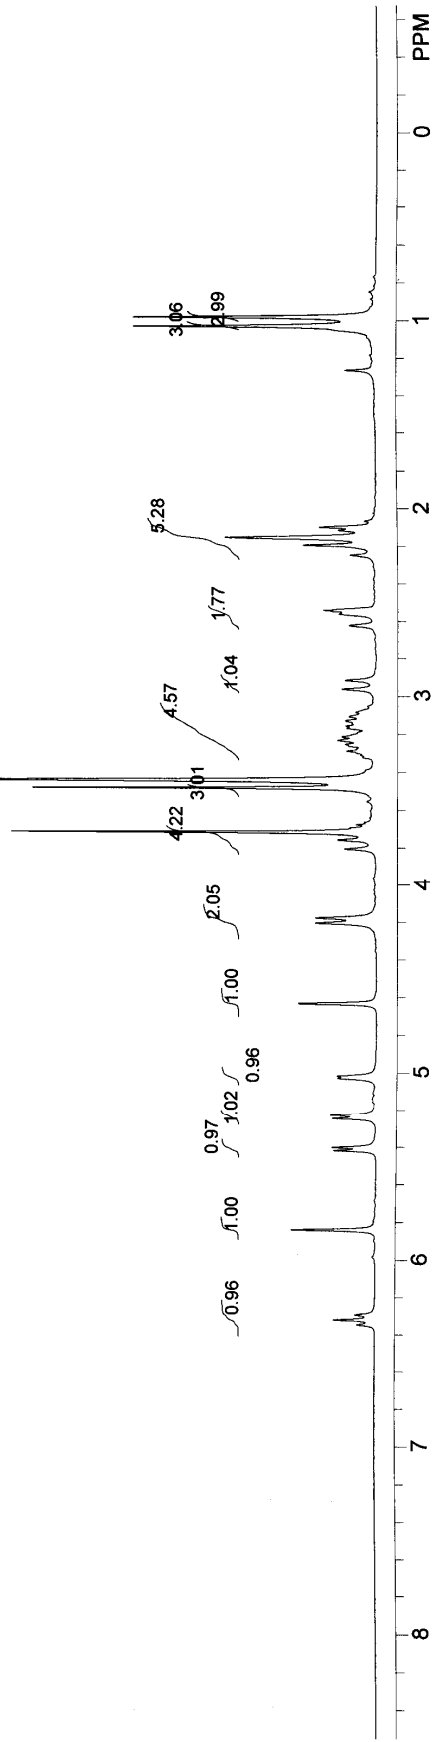

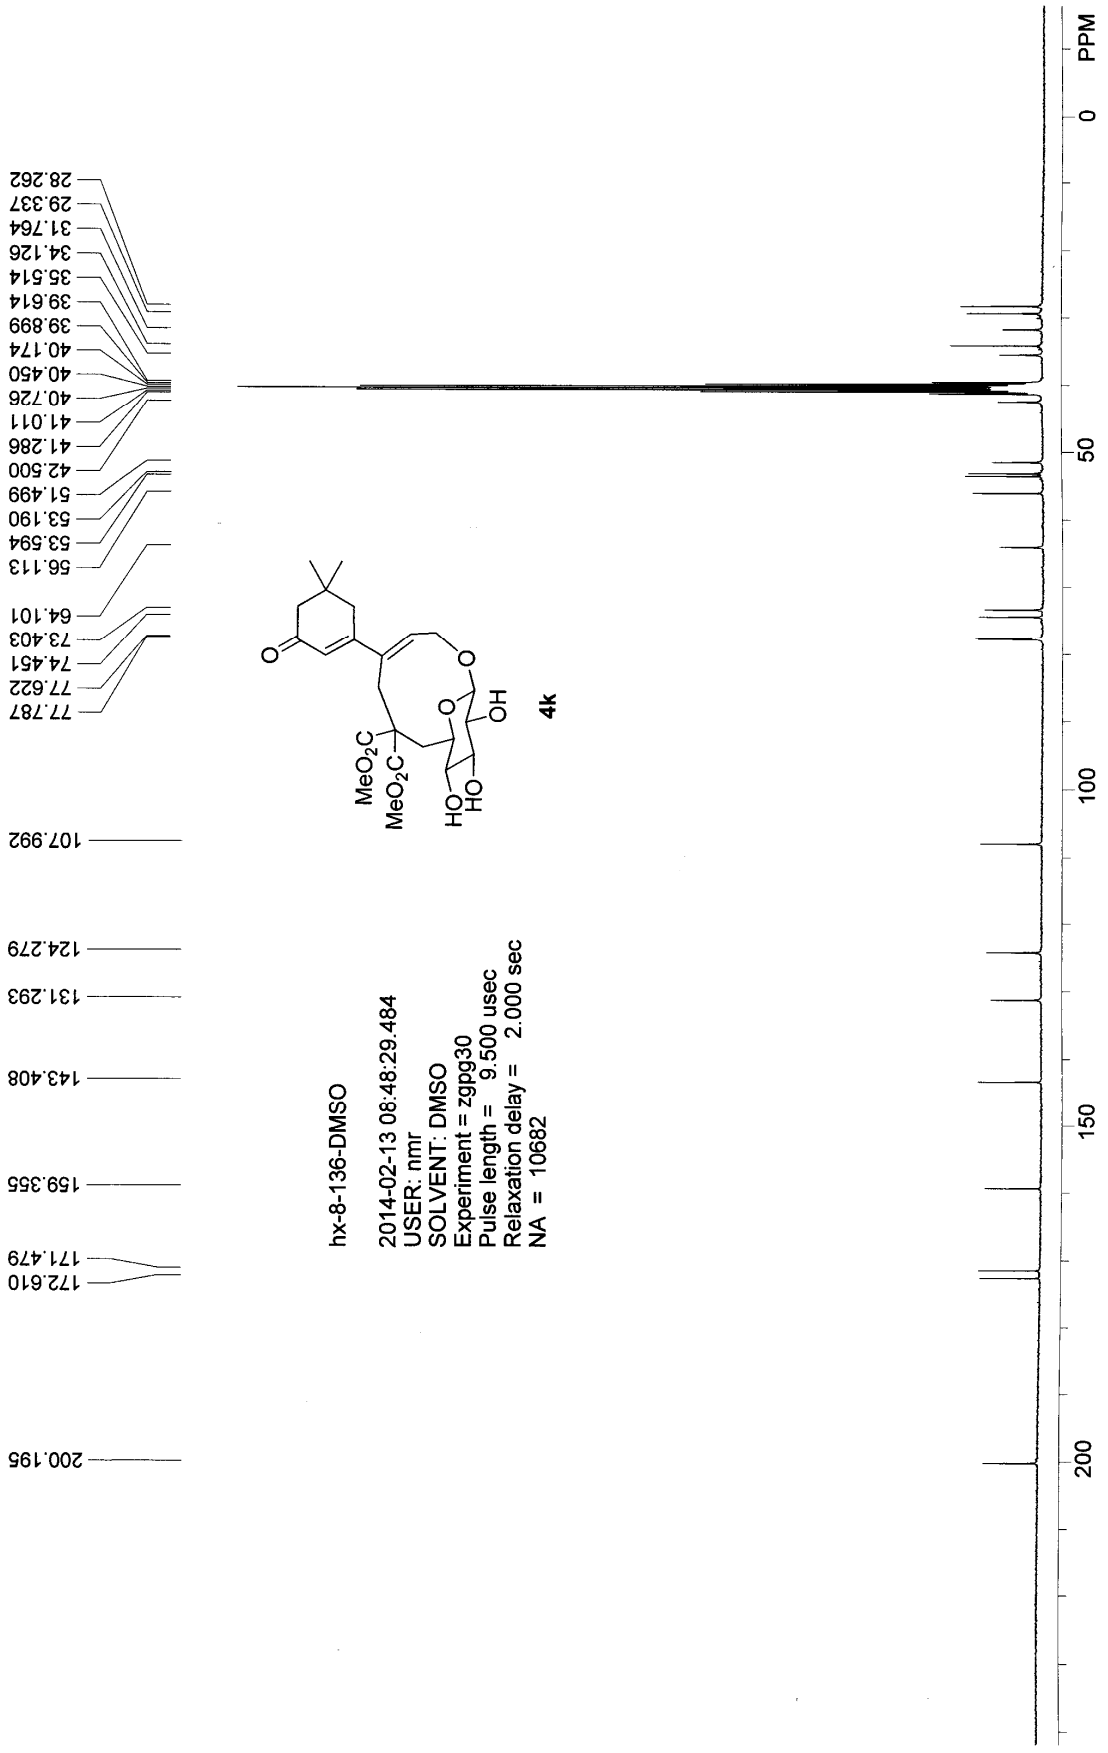

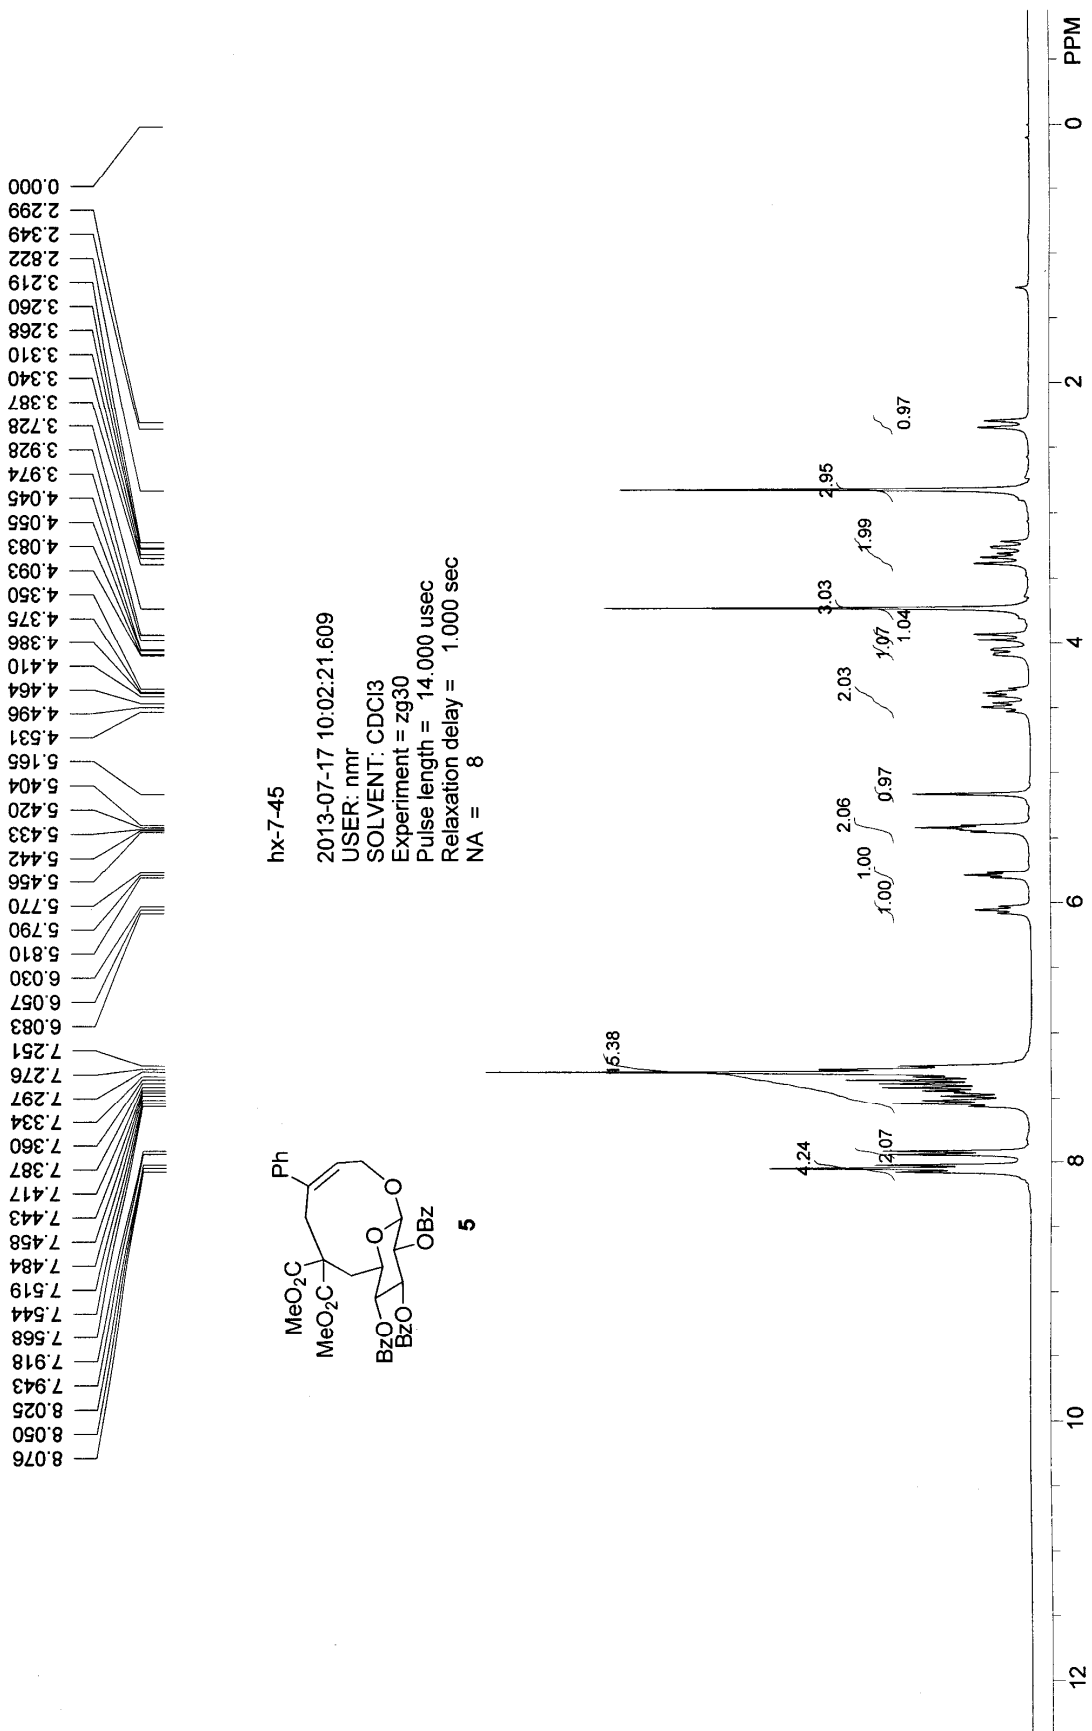

hx-7-45  
 2013-07-17 10:02:21.609  
 USER: nmr  
 SOLVENT: CDCl3  
 Experiment = zg30  
 Pulse length = 14.000 usec  
 Relaxation delay = 1.000 sec  
 NA = 8

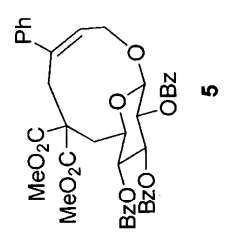

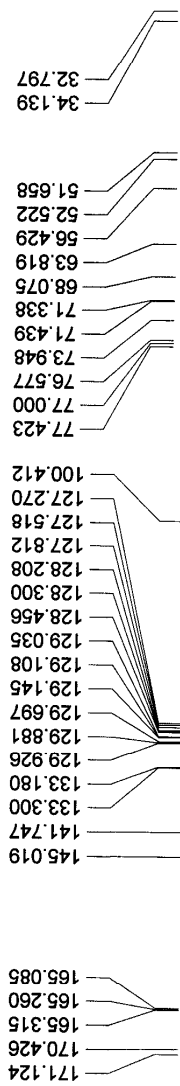

hx-7-45

2013-07-17 11:31:05.000

USER: nmr

SOLVENT: CDCl3

Experiment = zgpg30

Pulse length = 9.500 usec

Relaxation delay = 2.000 sec

NA = 1480

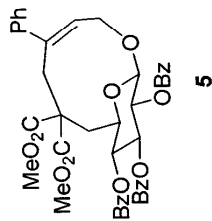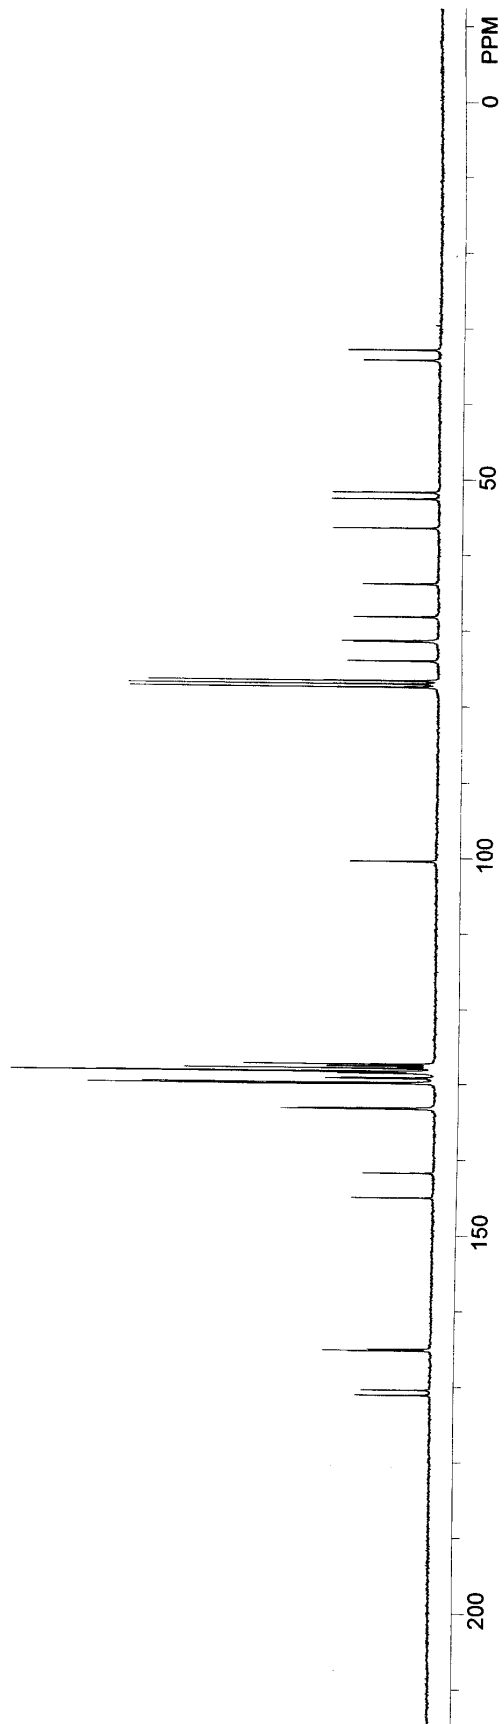

Supplement: c4ob01975j1.pdf [file c4ob01975j1.pdf]
